# Supplementary material
Source: PubMed Central journal article supplement (PMC8833190)
Supplement: NIHMS1509651-supplement-Supplemental_Figures_and_Tables.pdf [file NIHMS1509651-supplement-Supplemental_Figures_and_Tables.pdf]

# **SUPPLEMENTAL MATERIAL**

# Supplementary figure 1

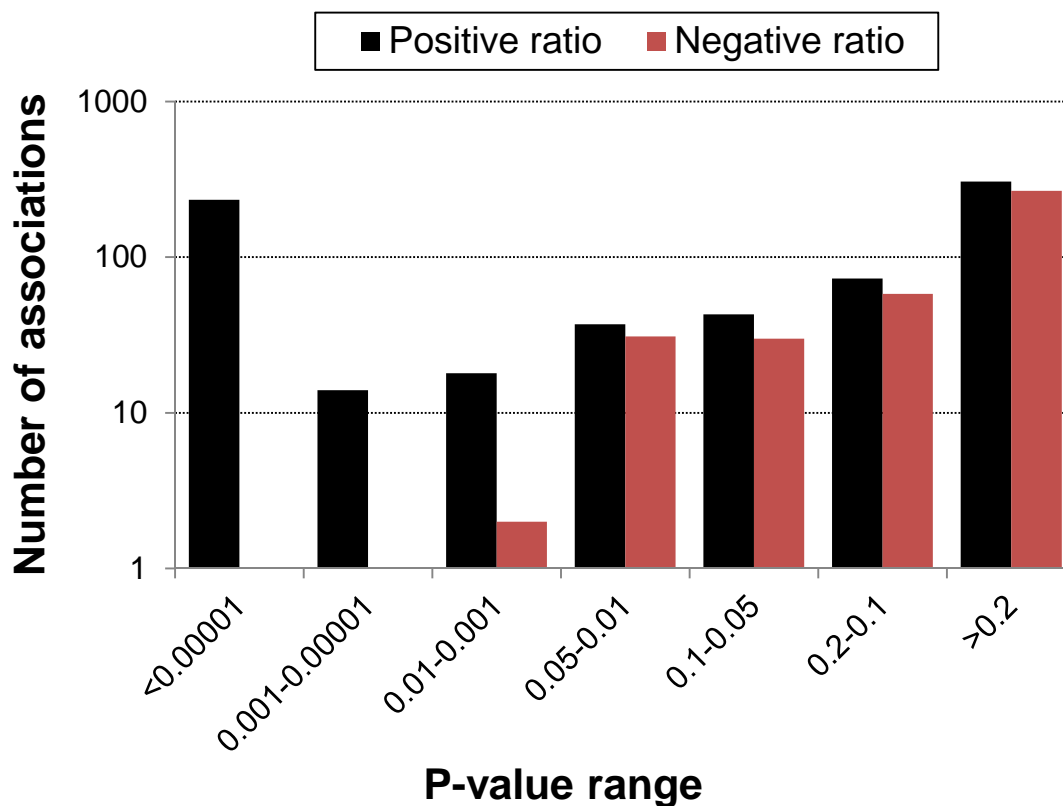

**Supplementary Figure 1: Frequency histogram showing the direction of ratio estimates from the inverse-variance weighted average (IVWA) analysis of the best Framingham predictor in the KORA data set.** Results are binned by the p-value from the IVWA analysis. Results are binned by p-value. The colored bars indicated with the direction of the association is in the expected direction (i.e. a positive association) or in the opposite direction.

**Supplementary Table 1: Characteristics of the EHR population.**

| <b>Characteristic</b>              | <b>n=41,288</b>  |
|------------------------------------|------------------|
| <b>Birth Decade</b>                |                  |
| median (IQR)                       | 1945 (1935-1955) |
| <b>Gender [n (%)]</b>              |                  |
| Males                              | 21,097 (51.1)    |
| Females                            | 20,191 (48.9)    |
| <b>Contributing center [n (%)]</b> |                  |
| Marshfield                         | 3,707 (9.0)      |
| VUMC                               | 20,230 (49.0)    |
| Group Health                       | 2,358 (5.7)      |
| Mayo                               | 6,665 (16.1)     |
| Northwestern                       | 1,247 (3.0)      |
| Geisinger                          | 2,946 (7.1)      |
| Harvard                            | 4,135 (10.0)     |

**Supplementary Table 2: Characteristics of the Malmö Diet and Cancer Study (MDCS) population.**

| <b>Characteristic</b>                     | <b>n=651</b> |
|-------------------------------------------|--------------|
| <b>Age (years) [Mean, s.d.]</b>           | 59.0 (5.6)   |
| <b>Gender [n (%)]</b>                     |              |
| Males                                     | 305 (46.9%)  |
| Females                                   | 346 (53.15%) |
| <b>Incident diabetes [n (%)]</b>          | 163 (25.0%)  |
| <b>Incident CHD [n (%)]</b>               | 162 (24.9%)  |
| <b>LDL-C levels (mmol/L) [mean, s.d.]</b> | 4.32 (1.00)  |
| <b>Prevalent carotid plaque [n (%)]</b>   | 168 (26.4%)  |

**Supplementary Table 3: SNPs and weights used to construct each protein predictor.**

| Protein                    | Variant ID   | Chromosome | Position  | Effect allele | Noneffect allele | Effect allele frequency | Beta  | Standard error | p-value |
|----------------------------|--------------|------------|-----------|---------------|------------------|-------------------------|-------|----------------|---------|
| 6Ckine                     | 3:132268469  | 3          | 132268469 | C             | T                | 0.87                    | 0.49  | 0.07           | 1.2E-11 |
| 6Ckine                     | 3:54289975   | 3          | 54289975  | A             | G                | 0.75                    | -0.31 | 0.06           | 6.8E-08 |
| a1_Antichymotrypsin        | 14:95095434  | 14         | 95095434  | C             | A                | 0.83                    | 0.50  | 0.07           | 3.1E-13 |
| a1_Antichymotrypsin        | 14:95131257  | 14         | 95131257  | G             | A                | 0.59                    | 0.29  | 0.05           | 2.0E-08 |
| a1_Antitrypsin             | 14:94769817  | 14         | 94769817  | G             | A                | 0.87                    | -0.44 | 0.08           | 2.4E-07 |
| a1_Antitrypsin             | 14:94796184  | 14         | 94796184  | A             | T                | 0.80                    | 0.37  | 0.06           | 4.1E-09 |
| a1_Antitrypsin             | 14:94838740  | 14         | 94838740  | A             | G                | 0.70                    | -0.31 | 0.06           | 1.8E-08 |
| a2_HS_Glycoprotein         | 3:186337827  | 3          | 186337827 | C             | T                | 0.52                    | 0.39  | 0.05           | 1.3E-16 |
| a2_HS_Glycoprotein         | 3:186344614  | 3          | 186344614 | C             | T                | 0.88                    | 0.47  | 0.08           | 3.9E-09 |
| ADAMTS_5                   | 21:28226787  | 21         | 28226787  | C             | T                | 0.83                    | 0.53  | 0.07           | 1.7E-15 |
| ADAMTS_5                   | 21:28231324  | 21         | 28231324  | G             | T                | 0.95                    | 0.62  | 0.10           | 2.2E-09 |
| ADAMTS_5                   | 21:28273975  | 21         | 28273975  | A             | T                | 0.87                    | -0.55 | 0.07           | 7.6E-17 |
| ADAMTS_5                   | 21:28311572  | 21         | 28311572  | C             | T                | 0.84                    | 0.81  | 0.06           | 5.2E-47 |
| ADAMTS_5                   | 21:28317134  | 21         | 28317134  | T             | C                | 0.63                    | -0.36 | 0.04           | 5.4E-16 |
| AK1A1                      | 1:46044314   | 1          | 46044314  | C             | T                | 0.79                    | 0.45  | 0.06           | 7.1E-14 |
| AK1A1                      | 1:46051053   | 1          | 46051053  | G             | A                | 0.95                    | 1.65  | 0.12           | 5.4E-44 |
| AK1A1                      | 1:46939999   | 1          | 46939999  | G             | C                | 0.77                    | 0.44  | 0.08           | 2.5E-08 |
| AK1A1                      | 1:47016761   | 1          | 47016761  | C             | T                | 0.94                    | 0.72  | 0.13           | 6.0E-08 |
| AK1A1                      | 20:37914526  | 20         | 37914526  | G             | A                | 0.79                    | -0.37 | 0.07           | 1.5E-07 |
| Alkaline_phosphatase__bone | 3:46488936   | 3          | 46488936  | C             | T                | 0.92                    | -0.65 | 0.11           | 1.4E-09 |
| Alkaline_phosphatase__bone | 3:46493078   | 3          | 46493078  | T             | C                | 0.68                    | -0.53 | 0.05           | 3.4E-25 |
| Alkaline_phosphatase__bone | 3:46543325   | 3          | 46543325  | C             | T                | 0.77                    | 0.33  | 0.06           | 8.4E-09 |
| Angiogenin                 | 14:21130632  | 14         | 21130632  | A             | G                | 0.79                    | -0.36 | 0.06           | 6.5E-09 |
| Angiogenin                 | 14:21155393  | 14         | 21155393  | G             | A                | 0.53                    | 0.30  | 0.05           | 7.7E-10 |
| Angiogenin                 | 14:21157936  | 14         | 21157936  | G             | A                | 0.87                    | -0.75 | 0.08           | 7.0E-19 |
| Angiogenin                 | 14:21161385  | 14         | 21161385  | T             | G                | 0.95                    | -0.74 | 0.11           | 2.0E-11 |
| Angiotensinogen            | 1:230831161  | 1          | 230831161 | G             | A                | 0.88                    | -0.38 | 0.07           | 6.4E-08 |
| annexin_II                 | 10:113296281 | 10         | 113296281 | C             | T                | 0.94                    | 0.55  | 0.11           | 9.4E-07 |
| annexin_II                 | 11:18698379  | 11         | 18698379  | A             | G                | 0.59                    | -0.31 | 0.07           | 2.3E-06 |
| annexin_II                 | 15:60687152  | 15         | 60687152  | T             | G                | 0.85                    | -0.33 | 0.07           | 7.6E-07 |
| annexin_II                 | 7:6243255    | 7          | 6243255   | T             | C                | 0.89                    | -0.44 | 0.09           | 2.5E-06 |
| Apo_E                      | 11:116967666 | 11         | 116967666 | T             | C                | 0.89                    | -0.50 | 0.08           | 4.3E-09 |
| Apo_E                      | 19:45372794  | 19         | 45372794  | G             | A                | 0.86                    | 0.49  | 0.08           | 6.6E-11 |
| Apo_E2                     | 19:45331103  | 19         | 45331103  | G             | A                | 0.52                    | 0.42  | 0.07           | 4.3E-09 |
| Apo_E2                     | 19:45373565  | 19         | 45373565  | G             | A                | 0.85                    | 0.40  | 0.07           | 3.6E-08 |
| Apo_E2                     | 19:45395266  | 19         | 45395266  | A             | G                | 0.58                    | 0.58  | 0.09           | 9.9E-11 |
| Apo_E2                     | 19:45411941  | 19         | 45411941  | T             | C                | 0.88                    | -0.83 | 0.10           | 1.1E-16 |
| Apo_E3                     | 11:116967666 | 11         | 116967666 | T             | C                | 0.89                    | -0.45 | 0.08           | 1.2E-07 |

|        |              |    |           |   |   |      |       |      |          |
|--------|--------------|----|-----------|---|---|------|-------|------|----------|
| Apo_E3 | 19:45331103  | 19 | 45331103  | G | A | 0.52 | 0.39  | 0.07 | 1.2E-07  |
| Apo_E3 | 19:45372794  | 19 | 45372794  | G | A | 0.86 | 0.42  | 0.08 | 2.7E-08  |
| Apo_E3 | 19:45395266  | 19 | 45395266  | A | G | 0.58 | 0.47  | 0.09 | 1.7E-07  |
| Apo_E3 | 19:45411941  | 19 | 45411941  | T | C | 0.88 | -0.55 | 0.10 | 9.0E-08  |
| Apo_E4 | 11:116967666 | 11 | 116967666 | T | C | 0.89 | -0.44 | 0.08 | 1.9E-07  |
| Apo_E4 | 19:45372794  | 19 | 45372794  | G | A | 0.86 | 0.42  | 0.08 | 3.4E-08  |
| ARSB   | 4:2358528    | 4  | 2358528   | G | A | 0.82 | 0.39  | 0.07 | 3.3E-08  |
| ARSB   | 5:78179742   | 5  | 78179742  | G | A | 0.56 | 0.37  | 0.05 | 1.2E-13  |
| ARSB   | 5:78263670   | 5  | 78263670  | C | T | 0.80 | -0.37 | 0.06 | 6.8E-09  |
| ARTS1  | 5:95969820   | 5  | 95969820  | C | T | 0.80 | -0.49 | 0.07 | 2.2E-12  |
| ARTS1  | 5:95982675   | 5  | 95982675  | A | C | 0.92 | -0.89 | 0.12 | 6.9E-13  |
| ARTS1  | 5:96018066   | 5  | 96018066  | C | G | 0.79 | -0.46 | 0.06 | 1.6E-13  |
| ARTS1  | 5:96046039   | 5  | 96046039  | C | A | 0.72 | -0.51 | 0.06 | 4.6E-18  |
| ARTS1  | 5:96069295   | 5  | 96069295  | G | A | 0.91 | -0.79 | 0.09 | 6.7E-18  |
| ARTS1  | 5:96116940   | 5  | 96116940  | G | A | 0.62 | -0.38 | 0.05 | 2.2E-13  |
| ARTS1  | 5:96119339   | 5  | 96119339  | G | T | 0.79 | 1.15  | 0.05 | 1.4E-116 |
| ARTS1  | 5:96123055   | 5  | 96123055  | G | A | 0.78 | -1.11 | 0.05 | 4.3E-128 |
| ARTS1  | 5:96164641   | 5  | 96164641  | C | A | 0.85 | -0.55 | 0.07 | 4.7E-14  |
| ARTS1  | 5:96182717   | 5  | 96182717  | A | G | 0.67 | -0.68 | 0.05 | 2.0E-39  |
| ARTS1  | 5:96214217   | 5  | 96214217  | C | T | 0.88 | 0.85  | 0.07 | 3.4E-34  |
| ARTS1  | 5:96229272   | 5  | 96229272  | G | A | 0.58 | -0.54 | 0.05 | 1.9E-26  |
| ARTS1  | 5:96229542   | 5  | 96229542  | T | G | 0.86 | -0.81 | 0.08 | 7.1E-24  |
| ARTS1  | 5:96377146   | 5  | 96377146  | C | T | 0.93 | -0.59 | 0.10 | 1.1E-08  |
| ARTS1  | 5:96411890   | 5  | 96411890  | T | C | 0.94 | 0.70  | 0.11 | 3.6E-11  |
| ASAH2  | 10:52017680  | 10 | 52017680  | A | G | 0.77 | 0.66  | 0.05 | 3.5E-35  |
| ASAH2  | 10:52020743  | 10 | 52020743  | G | A | 0.88 | 0.49  | 0.07 | 2.1E-11  |
| AS AHL | 12:102000977 | 12 | 102000977 | A | G | 0.86 | 0.47  | 0.08 | 5.6E-09  |
| AS AHL | 12:102032125 | 12 | 102032125 | C | T | 0.56 | -0.30 | 0.05 | 2.5E-08  |
| AS AHL | 12:102088361 | 12 | 102088361 | C | T | 0.58 | 0.31  | 0.05 | 1.1E-08  |
| AS AHL | 12:102185145 | 12 | 102185145 | T | C | 0.84 | 0.45  | 0.07 | 1.0E-11  |
| AS AHL | 4:76817221   | 4  | 76817221  | T | C | 0.83 | -0.39 | 0.07 | 3.1E-08  |
| AS AHL | 4:76839569   | 4  | 76839569  | C | T | 0.95 | -0.99 | 0.10 | 5.0E-21  |
| AS AHL | 4:76859615   | 4  | 76859615  | A | T | 0.64 | -0.35 | 0.05 | 1.4E-10  |
| AS AHL | 4:76887465   | 4  | 76887465  | A | T | 0.74 | 0.72  | 0.06 | 5.7E-37  |
| AS AHL | 4:77004178   | 4  | 77004178  | A | G | 0.55 | -0.34 | 0.06 | 6.3E-10  |
| ATS13  | 9:136170732  | 9  | 136170732 | G | A | 0.60 | -0.31 | 0.06 | 3.6E-07  |
| ATS13  | 9:136182615  | 9  | 136182615 | C | T | 0.95 | -0.98 | 0.15 | 5.3E-11  |
| ATS13  | 9:136193546  | 9  | 136193546 | C | T | 0.89 | 0.67  | 0.08 | 4.3E-16  |
| ATS13  | 9:136303253  | 9  | 136303253 | T | C | 0.61 | 0.54  | 0.05 | 1.7E-28  |
| ATS13  | 9:136336908  | 9  | 136336908 | G | A | 0.95 | 2.03  | 0.16 | 3.7E-38  |
| BCAM   | 6:151035800  | 6  | 151035800 | C | T | 0.67 | 0.29  | 0.06 | 2.5E-07  |
| BCAM   | 8:99185979   | 8  | 99185979  | G | A | 0.90 | -0.53 | 0.10 | 3.6E-07  |

|                       |              |    |           |   |   |      |       |      |          |
|-----------------------|--------------|----|-----------|---|---|------|-------|------|----------|
| BCAM                  | 9:136146431  | 9  | 136146431 | C | T | 0.68 | -0.30 | 0.06 | 1.4E-07  |
| b_Endorphin           | 11:116671823 | 11 | 116671823 | G | C | 0.88 | -0.43 | 0.08 | 2.7E-07  |
| b_Endorphin           | 11:116718415 | 11 | 116718415 | G | A | 0.85 | 0.46  | 0.07 | 5.6E-11  |
| BGH3                  | 5:135389433  | 5  | 135389433 | T | C | 0.52 | -0.54 | 0.04 | 3.8E-33  |
| BGH3                  | 5:135418032  | 5  | 135418032 | G | A | 0.65 | -0.31 | 0.05 | 7.5E-10  |
| BPI                   | 20:36920753  | 20 | 36920753  | A | C | 0.66 | -0.38 | 0.06 | 2.3E-11  |
| BPI                   | 20:36937881  | 20 | 36937881  | T | A | 0.57 | -0.35 | 0.05 | 2.9E-11  |
| BPI                   | 20:36974157  | 20 | 36974157  | A | G | 0.87 | 0.53  | 0.08 | 4.3E-11  |
| BSSP4                 | 12:77090093  | 12 | 77090093  | G | A | 0.92 | -0.40 | 0.09 | 4.1E-06  |
| BSSP4                 | 1:84026079   | 1  | 84026079  | C | T | 0.92 | -0.45 | 0.10 | 3.6E-06  |
| BSSP4                 | 4:129316730  | 4  | 129316730 | A | T | 0.85 | 0.37  | 0.07 | 8.5E-07  |
| BSSP4                 | 5:136172926  | 5  | 136172926 | G | A | 0.89 | 0.38  | 0.08 | 1.3E-06  |
| BSSP4                 | 9:16758776   | 9  | 16758776  | C | T | 0.91 | 0.38  | 0.08 | 2.8E-06  |
| BST1                  | 4:15442146   | 4  | 15442146  | C | T | 0.86 | 0.54  | 0.07 | 2.8E-13  |
| BST1                  | 4:15538922   | 4  | 15538922  | T | G | 0.55 | 0.48  | 0.05 | 7.3E-24  |
| BST1                  | 4:15683968   | 4  | 15683968  | G | C | 0.64 | 0.53  | 0.05 | 7.6E-25  |
| BST1                  | 4:15691259   | 4  | 15691259  | G | A | 0.82 | -0.50 | 0.06 | 6.7E-15  |
| BST1                  | 4:15705039   | 4  | 15705039  | T | G | 0.53 | 0.47  | 0.05 | 4.4E-21  |
| BST1                  | 4:15714189   | 4  | 15714189  | C | A | 0.85 | 1.44  | 0.04 | 9.8E-226 |
| BST1                  | 4:15756270   | 4  | 15756270  | A | T | 0.79 | 0.80  | 0.06 | 5.8E-45  |
| BST1                  | 4:15775906   | 4  | 15775906  | G | A | 0.50 | -0.38 | 0.05 | 2.9E-12  |
| BST1                  | 4:15806720   | 4  | 15806720  | G | A | 0.95 | 0.70  | 0.11 | 3.2E-10  |
| C1_Esterase_Inhibitor | 11:57352562  | 11 | 57352562  | C | A | 0.78 | -0.31 | 0.06 | 1.5E-07  |
| C1_Esterase_Inhibitor | 11:57374332  | 11 | 57374332  | T | C | 0.72 | 0.70  | 0.06 | 1.2E-34  |
| C1_Esterase_Inhibitor | 11:57434906  | 11 | 57434906  | G | T | 0.91 | 0.60  | 0.11 | 9.9E-08  |
| C1_Esterase_Inhibitor | 11:57639089  | 11 | 57639089  | C | T | 0.90 | 0.74  | 0.11 | 2.0E-11  |
| C1_Esterase_Inhibitor | 11:57687365  | 11 | 57687365  | C | G | 0.56 | -0.30 | 0.05 | 4.7E-09  |
| C1_Esterase_Inhibitor | 18:42512532  | 18 | 42512532  | G | C | 0.56 | 0.29  | 0.05 | 9.3E-08  |
| C1s                   | 1:196675861  | 1  | 196675861 | A | G | 0.61 | 0.51  | 0.05 | 4.8E-24  |
| C1s                   | 1:196684574  | 1  | 196684574 | C | T | 0.84 | -0.61 | 0.07 | 6.1E-17  |
| C1s                   | 1:196851253  | 1  | 196851253 | G | T | 0.88 | 0.58  | 0.08 | 9.6E-14  |
| C34_gp41_HIV_Fragment | 6:31836202   | 6  | 31836202  | A | C | 0.92 | -0.51 | 0.09 | 3.2E-09  |
| C34_gp41_HIV_Fragment | 6:31872383   | 6  | 31872383  | G | A | 0.92 | -0.59 | 0.09 | 1.7E-10  |
| C34_gp41_HIV_Fragment | 6:31914179   | 6  | 31914179  | C | T | 0.91 | -1.03 | 0.08 | 9.5E-41  |
| C34_gp41_HIV_Fragment | 6:31947594   | 6  | 31947594  | G | C | 0.87 | -0.65 | 0.07 | 2.1E-21  |
| C34_gp41_HIV_Fragment | 6:32032743   | 6  | 32032743  | G | A | 0.57 | 0.37  | 0.05 | 9.7E-14  |
| C4                    | 11:134370586 | 11 | 134370586 | C | G | 0.82 | 0.38  | 0.07 | 2.6E-07  |
| C4                    | 11:7557591   | 11 | 7557591   | G | A | 0.82 | -0.35 | 0.07 | 1.8E-06  |
| C4                    | 16:86323433  | 16 | 86323433  | C | T | 0.88 | 0.42  | 0.08 | 5.0E-07  |
| C4                    | 2:234156536  | 2  | 234156536 | T | G | 0.53 | 0.24  | 0.05 | 3.8E-06  |
| C4                    | 6:28787384   | 6  | 28787384  | T | C | 0.92 | 0.48  | 0.09 | 1.8E-07  |
| C4                    | 6:29986324   | 6  | 29986324  | T | A | 0.91 | 0.45  | 0.09 | 1.8E-07  |

|     |              |    |           |   |   |      |       |      |         |
|-----|--------------|----|-----------|---|---|------|-------|------|---------|
| C4  | 6:31081940   | 6  | 31081940  | T | C | 0.75 | 0.45  | 0.06 | 2.6E-15 |
| C4  | 6:31100869   | 6  | 31100869  | G | A | 0.76 | -0.28 | 0.06 | 3.2E-06 |
| C4  | 6:31102672   | 6  | 31102672  | T | C | 0.63 | -0.39 | 0.05 | 4.3E-14 |
| C4  | 6:31242585   | 6  | 31242585  | G | A | 0.84 | -0.43 | 0.09 | 6.3E-07 |
| C4  | 6:31325822   | 6  | 31325822  | A | G | 0.76 | 0.48  | 0.08 | 4.5E-10 |
| C4  | 6:31328685   | 6  | 31328685  | C | A | 0.82 | -0.40 | 0.09 | 3.7E-06 |
| C4  | 6:31399945   | 6  | 31399945  | T | C | 0.93 | -0.78 | 0.12 | 3.5E-11 |
| C4  | 6:31449213   | 6  | 31449213  | A | T | 0.93 | -0.47 | 0.10 | 2.4E-06 |
| C4  | 6:31461613   | 6  | 31461613  | T | C | 0.83 | -0.48 | 0.07 | 1.4E-11 |
| C4  | 6:31472720   | 6  | 31472720  | G | T | 0.77 | 0.37  | 0.07 | 2.9E-08 |
| C4  | 6:31476363   | 6  | 31476363  | G | A | 0.95 | 0.55  | 0.11 | 8.7E-07 |
| C4  | 6:31483136   | 6  | 31483136  | A | G | 0.65 | -0.43 | 0.06 | 3.7E-14 |
| C4  | 6:31485101   | 6  | 31485101  | A | C | 0.76 | 0.53  | 0.06 | 1.0E-18 |
| C4  | 6:31603770   | 6  | 31603770  | A | G | 0.83 | 0.50  | 0.07 | 1.1E-14 |
| C4  | 6:31713454   | 6  | 31713454  | C | T | 0.86 | -0.47 | 0.07 | 2.6E-11 |
| C4  | 6:31769796   | 6  | 31769796  | C | T | 0.91 | -0.54 | 0.09 | 6.3E-09 |
| C4  | 6:31931137   | 6  | 31931137  | T | C | 0.80 | -0.48 | 0.06 | 2.8E-14 |
| C4  | 6:31946614   | 6  | 31946614  | G | A | 0.68 | 0.29  | 0.06 | 4.2E-07 |
| C4  | 6:32007625   | 6  | 32007625  | C | T | 0.94 | -0.73 | 0.12 | 1.3E-09 |
| C4  | 6:32573877   | 6  | 32573877  | T | C | 0.65 | -0.38 | 0.07 | 2.8E-08 |
| C4  | 6:32673230   | 6  | 32673230  | C | T | 0.84 | -0.47 | 0.09 | 3.1E-07 |
| C4  | 6:32776921   | 6  | 32776921  | T | C | 0.90 | 0.48  | 0.09 | 1.1E-07 |
| C4  | 6:32796057   | 6  | 32796057  | G | A | 0.76 | -0.34 | 0.06 | 7.3E-08 |
| C4  | 8:19143937   | 8  | 19143937  | G | T | 0.74 | 0.30  | 0.06 | 2.8E-07 |
| C4  | 9:18312495   | 9  | 18312495  | T | C | 0.52 | -0.26 | 0.05 | 5.2E-07 |
| C4b | 10:2355947   | 10 | 2355947   | T | C | 0.81 | 0.26  | 0.06 | 4.2E-05 |
| C4b | 11:134330488 | 11 | 134330488 | C | T | 0.84 | -0.36 | 0.07 | 8.8E-07 |
| C4b | 11:4233350   | 11 | 4233350   | A | G | 0.74 | 0.31  | 0.06 | 7.4E-08 |
| C4b | 11:93063200  | 11 | 93063200  | C | T | 0.69 | 0.23  | 0.06 | 3.5E-05 |
| C4b | 13:95502594  | 13 | 95502594  | A | T | 0.81 | 0.41  | 0.10 | 2.9E-05 |
| C4b | 13:98514965  | 13 | 98514965  | A | G | 0.83 | 0.30  | 0.07 | 3.6E-05 |
| C4b | 14:100136575 | 14 | 100136575 | C | A | 0.62 | -0.26 | 0.06 | 4.6E-05 |
| C4b | 14:103643828 | 14 | 103643828 | A | G | 0.66 | 0.24  | 0.06 | 1.9E-05 |
| C4b | 14:91817829  | 14 | 91817829  | A | G | 0.92 | -0.42 | 0.09 | 7.4E-06 |
| C4b | 15:79898351  | 15 | 79898351  | T | C | 0.69 | 0.23  | 0.05 | 1.8E-05 |
| C4b | 15:99139635  | 15 | 99139635  | G | A | 0.51 | 0.22  | 0.05 | 2.2E-05 |
| C4b | 16:82830061  | 16 | 82830061  | A | G | 0.73 | 0.25  | 0.06 | 7.7E-06 |
| C4b | 16:84314450  | 16 | 84314450  | C | T | 0.86 | 0.35  | 0.08 | 3.3E-06 |
| C4b | 1:166445116  | 1  | 166445116 | G | A | 0.74 | -0.24 | 0.06 | 3.8E-05 |
| C4b | 1:18352387   | 1  | 18352387  | C | T | 0.51 | 0.21  | 0.05 | 4.6E-05 |
| C4b | 20:17673552  | 20 | 17673552  | G | A | 0.87 | 0.34  | 0.08 | 4.8E-05 |
| C4b | 21:20126172  | 21 | 20126172  | G | T | 0.78 | 0.30  | 0.07 | 1.4E-05 |



|            |             |    |           |   |   |      |       |      |         |
|------------|-------------|----|-----------|---|---|------|-------|------|---------|
| C4b        | 21:37839410 | 21 | 37839410  | G | A | 0.82 | -0.31 | 0.07 | 7.2E-06 |
| C4b        | 21:42477040 | 21 | 42477040  | C | G | 0.75 | 0.31  | 0.06 | 2.8E-07 |
| C4b        | 22:44823445 | 22 | 44823445  | G | A | 0.69 | 0.29  | 0.05 | 1.0E-07 |
| C4b        | 2:227446979 | 2  | 227446979 | G | T | 0.63 | 0.22  | 0.05 | 2.9E-05 |
| C4b        | 2:22922022  | 2  | 22922022  | A | G | 0.59 | -0.23 | 0.05 | 8.4E-06 |
| C4b        | 2:241569329 | 2  | 241569329 | G | A | 0.53 | 0.23  | 0.06 | 4.3E-05 |
| C4b        | 2:49750957  | 2  | 49750957  | C | T | 0.94 | -0.45 | 0.11 | 2.5E-05 |
| C4b        | 2:75166238  | 2  | 75166238  | T | G | 0.73 | -0.24 | 0.06 | 3.6E-05 |
| C4b        | 3:141346056 | 3  | 141346056 | C | G | 0.56 | -0.36 | 0.06 | 1.4E-08 |
| C4b        | 3:141366078 | 3  | 141366078 | T | A | 0.79 | 0.26  | 0.06 | 4.8E-05 |
| C4b        | 3:143991325 | 3  | 143991325 | G | A | 0.80 | 0.27  | 0.06 | 1.2E-05 |
| C4b        | 3:23500010  | 3  | 23500010  | A | G | 0.53 | 0.23  | 0.05 | 1.2E-05 |
| C4b        | 3:30292422  | 3  | 30292422  | G | A | 0.85 | -0.31 | 0.07 | 1.8E-05 |
| C4b        | 3:30388484  | 3  | 30388484  | C | A | 0.93 | 0.57  | 0.13 | 1.2E-05 |
| C4b        | 4:15897924  | 4  | 15897924  | G | A | 0.73 | -0.25 | 0.06 | 2.3E-05 |
| C4b        | 4:163308497 | 4  | 163308497 | T | C | 0.66 | 0.23  | 0.05 | 1.8E-05 |
| C4b        | 4:25010879  | 4  | 25010879  | C | T | 0.94 | 0.48  | 0.11 | 1.9E-05 |
| C4b        | 5:142365520 | 5  | 142365520 | C | T | 0.80 | -0.27 | 0.07 | 3.4E-05 |
| C4b        | 5:161908964 | 5  | 161908964 | G | A | 0.81 | 0.27  | 0.06 | 1.9E-05 |
| C4b        | 6:31081409  | 6  | 31081409  | T | C | 0.67 | 0.26  | 0.05 | 1.9E-06 |
| C4b        | 6:31092767  | 6  | 31092767  | C | T | 0.84 | -0.29 | 0.07 | 4.3E-05 |
| C4b        | 6:31106499  | 6  | 31106499  | G | A | 0.86 | 0.29  | 0.07 | 2.1E-05 |
| C4b        | 6:31145123  | 6  | 31145123  | A | G | 0.66 | 0.23  | 0.06 | 4.0E-05 |
| C4b        | 6:31270038  | 6  | 31270038  | A | G | 0.87 | 0.41  | 0.08 | 8.2E-08 |
| C4b        | 6:31397621  | 6  | 31397621  | T | A | 0.95 | 0.67  | 0.16 | 4.3E-05 |
| C4b        | 6:31482592  | 6  | 31482592  | C | T | 0.79 | 0.27  | 0.06 | 4.3E-05 |
| C4b        | 6:31566840  | 6  | 31566840  | C | T | 0.87 | 0.46  | 0.08 | 2.6E-08 |
| C4b        | 6:31635198  | 6  | 31635198  | T | C | 0.94 | 0.46  | 0.11 | 2.3E-05 |
| C4b        | 6:32006621  | 6  | 32006621  | A | C | 0.69 | 0.53  | 0.06 | 3.4E-21 |
| C4b        | 6:32007625  | 6  | 32007625  | C | T | 0.94 | -0.63 | 0.12 | 1.4E-07 |
| C4b        | 6:32119898  | 6  | 32119898  | C | T | 0.87 | -0.38 | 0.08 | 5.6E-07 |
| C4b        | 7:142503276 | 7  | 142503276 | G | T | 0.61 | 0.22  | 0.05 | 2.5E-05 |
| C4b        | 7:97265826  | 7  | 97265826  | C | T | 0.81 | 0.32  | 0.07 | 6.2E-06 |
| C4b        | 9:38137724  | 9  | 38137724  | G | T | 0.76 | 0.24  | 0.06 | 4.3E-05 |
| C4b        | 9:5359714   | 9  | 5359714   | T | A | 0.68 | 0.23  | 0.05 | 1.7E-05 |
| C4b        | 9:82727550  | 9  | 82727550  | A | G | 0.65 | 0.22  | 0.05 | 3.3E-05 |
| C7         | 5:40974680  | 5  | 40974680  | G | A | 0.75 | 0.46  | 0.06 | 6.0E-16 |
| C7         | 5:41267725  | 5  | 41267725  | C | T | 0.67 | -0.40 | 0.05 | 2.7E-15 |
| C8         | 1:70335682  | 1  | 70335682  | C | T | 0.50 | -0.26 | 0.05 | 4.1E-07 |
| C8         | 21:46750250 | 21 | 46750250  | G | A | 0.90 | -0.48 | 0.09 | 3.2E-07 |
| Cadherin_5 | 9:136084941 | 9  | 136084941 | T | C | 0.56 | -0.43 | 0.07 | 7.4E-10 |
| Cadherin_5 | 9:136128467 | 9  | 136128467 | A | G | 0.68 | -0.35 | 0.06 | 2.8E-10 |

|                         |              |    |           |   |   |      |       |      |          |
|-------------------------|--------------|----|-----------|---|---|------|-------|------|----------|
| Cadherin_5              | 9:136142185  | 9  | 136142185 | C | T | 0.92 | -1.13 | 0.09 | 1.5E-35  |
| Cadherin_5              | 9:136151806  | 9  | 136151806 | T | C | 0.79 | 0.39  | 0.07 | 3.0E-09  |
| Cadherin_5              | 9:136155359  | 9  | 136155359 | G | A | 0.62 | -0.41 | 0.07 | 1.8E-09  |
| Cadherin_5              | 9:136163447  | 9  | 136163447 | T | C | 0.77 | -0.71 | 0.08 | 8.8E-21  |
| Cadherin_5              | 9:136186926  | 9  | 136186926 | T | C | 0.67 | -0.38 | 0.07 | 5.6E-09  |
| Cadherin_5              | 9:136190948  | 9  | 136190948 | G | A | 0.76 | -0.45 | 0.07 | 2.1E-10  |
| CAMK1                   | 1:169253884  | 1  | 169253884 | A | G | 0.64 | -0.33 | 0.05 | 1.1E-11  |
| CAMK1                   | 1:169348434  | 1  | 169348434 | G | A | 0.88 | 0.75  | 0.09 | 1.0E-17  |
| CAMK1                   | 1:169490772  | 1  | 169490772 | G | A | 0.80 | -0.52 | 0.07 | 9.4E-13  |
| CAMK1                   | 1:169511755  | 1  | 169511755 | T | C | 0.73 | 1.11  | 0.04 | 2.5E-161 |
| CAMK1D                  | 17:26694861  | 17 | 26694861  | G | A | 0.49 | -0.35 | 0.06 | 5.5E-10  |
| CAPG                    | 2:85584988   | 2  | 85584988  | T | C | 0.65 | -0.31 | 0.05 | 1.9E-09  |
| Carbonic_anhydrase_6    | 1:9010984    | 1  | 9010984   | A | C | 0.50 | 0.45  | 0.05 | 1.1E-22  |
| Carbonic_anhydrase_6    | 1:9024458    | 1  | 9024458   | C | A | 0.78 | -0.58 | 0.10 | 1.3E-08  |
| Carbonic_anhydrase_6    | 1:9034598    | 1  | 9034598   | A | G | 0.60 | -0.61 | 0.07 | 2.2E-16  |
| Carbonic_anhydrase_6    | 1:9048244    | 1  | 9048244   | C | T | 0.52 | 0.34  | 0.05 | 9.0E-13  |
| Carbonic_anhydrase_XIII | 8:86194487   | 8  | 86194487  | A | C | 0.94 | 0.52  | 0.09 | 3.4E-08  |
| Catalase                | 10:85960296  | 10 | 85960296  | C | T | 0.54 | -0.25 | 0.05 | 6.3E-07  |
| Catalase                | 11:34488285  | 11 | 34488285  | G | A | 0.78 | 0.30  | 0.06 | 2.5E-06  |
| Catalase                | 18:70984252  | 18 | 70984252  | T | G | 0.78 | -0.35 | 0.07 | 5.4E-07  |
| Catalase                | 1:109815252  | 1  | 109815252 | A | G | 0.68 | 0.28  | 0.06 | 3.8E-06  |
| Catalase                | 2:24708638   | 2  | 24708638  | A | C | 0.51 | -0.25 | 0.05 | 1.5E-06  |
| Cathepsin_A             | 12:102219766 | 12 | 102219766 | G | A | 0.71 | 0.39  | 0.05 | 1.7E-13  |
| Cathepsin_B             | 8:11694986   | 8  | 11694986  | G | A | 0.74 | -0.47 | 0.06 | 1.6E-16  |
| Cathepsin_B             | 8:11713852   | 8  | 11713852  | A | G | 0.62 | 0.33  | 0.05 | 3.9E-10  |
| Cathepsin_S             | 1:150737220  | 1  | 150737220 | A | G | 0.91 | 1.10  | 0.10 | 1.0E-25  |
| Cathepsin_S             | 1:150774101  | 1  | 150774101 | A | G | 0.63 | -0.42 | 0.05 | 2.9E-15  |
| CATZ                    | 12:102029254 | 12 | 102029254 | A | C | 0.90 | 0.48  | 0.09 | 4.1E-08  |
| CATZ                    | 12:102095370 | 12 | 102095370 | T | G | 0.91 | 0.54  | 0.10 | 2.0E-08  |
| CATZ                    | 12:102218899 | 12 | 102218899 | T | C | 0.71 | 0.41  | 0.05 | 2.3E-14  |
| CD109                   | 6:74512687   | 6  | 74512687  | C | T | 0.48 | -0.64 | 0.05 | 1.2E-45  |
| CD109                   | 6:74531720   | 6  | 74531720  | C | T | 0.62 | -0.37 | 0.05 | 9.0E-13  |
| CD109                   | 6:74586805   | 6  | 74586805  | A | G | 0.59 | 0.30  | 0.06 | 6.2E-08  |
| CD23                    | 19:7755485   | 19 | 7755485   | G | A | 0.74 | 0.40  | 0.06 | 2.0E-11  |
| CD27                    | 3:186382095  | 3  | 186382095 | A | G | 0.83 | -0.46 | 0.07 | 5.2E-11  |
| CD27                    | 7:45005795   | 7  | 45005795  | G | A | 0.79 | -0.36 | 0.07 | 3.8E-08  |
| CD30_Ligand             | 9:117696266  | 9  | 117696266 | C | G | 0.74 | 0.34  | 0.06 | 7.3E-08  |
| CD36_ANTIGEN            | 9:136141870  | 9  | 136141870 | C | T | 0.82 | 0.53  | 0.07 | 8.3E-16  |
| CD48                    | 19:19429975  | 19 | 19429975  | C | G | 0.65 | -0.26 | 0.05 | 1.1E-06  |
| CD48                    | 1:40864856   | 1  | 40864856  | G | A | 0.93 | 0.49  | 0.11 | 4.0E-06  |
| CD48                    | 7:138758583  | 7  | 138758583 | A | G | 0.88 | 0.41  | 0.08 | 1.5E-06  |
| CDON                    | 11:125883765 | 11 | 125883765 | A | C | 0.92 | 0.76  | 0.09 | 1.7E-17  |

|                   |             |    |           |   |   |      |       |      |         |
|-------------------|-------------|----|-----------|---|---|------|-------|------|---------|
| CDON              | 11:62005245 | 11 | 62005245  | A | C | 0.59 | -0.29 | 0.05 | 4.0E-08 |
| Chitotriosidase_1 | 18:31926438 | 18 | 31926438  | C | T | 0.92 | 0.48  | 0.08 | 8.0E-09 |
| Chitotriosidase_1 | 1:203113189 | 1  | 203113189 | T | C | 0.80 | 0.35  | 0.06 | 3.6E-08 |
| Chitotriosidase_1 | 1:203169391 | 1  | 203169391 | A | G | 0.90 | 0.80  | 0.09 | 9.5E-18 |
| Chitotriosidase_1 | 1:203176399 | 1  | 203176399 | T | C | 0.72 | -0.39 | 0.05 | 3.2E-13 |
| Chitotriosidase_1 | 1:203181362 | 1  | 203181362 | C | A | 0.80 | 1.04  | 0.05 | 1.6E-97 |
| Ck_b_8_1          | 17:34326215 | 17 | 34326215  | C | A | 0.87 | 0.73  | 0.08 | 2.1E-21 |
| Ck_b_8_1          | 17:34361806 | 17 | 34361806  | A | G | 0.52 | -0.32 | 0.05 | 5.3E-10 |
| CK_MB             | 10:14306828 | 10 | 14306828  | T | G | 0.73 | 0.22  | 0.05 | 3.5E-05 |
| CK_MB             | 10:31712567 | 10 | 31712567  | G | A | 0.94 | 0.75  | 0.17 | 9.0E-06 |
| CK_MB             | 10:55754772 | 10 | 55754772  | T | C | 0.82 | 0.31  | 0.06 | 7.3E-07 |
| CK_MB             | 12:83320724 | 12 | 83320724  | C | T | 0.87 | -0.29 | 0.07 | 3.2E-05 |
| CK_MB             | 13:85969709 | 13 | 85969709  | T | G | 0.78 | -0.29 | 0.07 | 1.4E-05 |
| CK_MB             | 14:89577749 | 14 | 89577749  | G | A | 0.61 | -0.32 | 0.07 | 1.7E-05 |
| CK_MB             | 14:98430382 | 14 | 98430382  | A | G | 0.70 | -0.22 | 0.05 | 3.7E-05 |
| CK_MB             | 15:40317608 | 15 | 40317608  | G | A | 0.67 | 0.24  | 0.06 | 1.6E-05 |
| CK_MB             | 15:46825630 | 15 | 46825630  | T | C | 0.64 | -0.28 | 0.06 | 1.1E-05 |
| CK_MB             | 15:58682783 | 15 | 58682783  | C | A | 0.85 | 0.29  | 0.07 | 4.3E-05 |
| CK_MB             | 16:12283735 | 16 | 12283735  | T | G | 0.80 | 0.26  | 0.06 | 7.4E-06 |
| CK_MB             | 16:23347482 | 16 | 23347482  | T | C | 0.94 | -0.48 | 0.11 | 9.8E-06 |
| CK_MB             | 18:49211494 | 18 | 49211494  | T | G | 0.91 | -0.34 | 0.08 | 3.5E-05 |
| CK_MB             | 19:46906507 | 19 | 46906507  | G | A | 0.79 | -0.40 | 0.09 | 7.1E-06 |
| CK_MB             | 1:19510131  | 1  | 19510131  | G | A | 0.95 | -0.55 | 0.14 | 4.8E-05 |
| CK_MB             | 1:202089049 | 1  | 202089049 | C | G | 0.51 | 0.20  | 0.05 | 3.3E-05 |
| CK_MB             | 1:208787183 | 1  | 208787183 | T | G | 0.77 | -0.27 | 0.06 | 3.1E-06 |
| CK_MB             | 1:76714427  | 1  | 76714427  | C | G | 0.92 | -0.49 | 0.11 | 1.4E-05 |
| CK_MB             | 20:18766752 | 20 | 18766752  | A | G | 0.63 | -0.22 | 0.05 | 3.1E-05 |
| CK_MB             | 20:19563993 | 20 | 19563993  | C | G | 0.83 | -0.27 | 0.07 | 3.8E-05 |
| CK_MB             | 21:41728531 | 21 | 41728531  | G | A | 0.58 | 0.21  | 0.05 | 1.7E-05 |
| CK_MB             | 22:20068086 | 22 | 20068086  | G | C | 0.73 | -0.25 | 0.06 | 5.7E-06 |
| CK_MB             | 22:30373964 | 22 | 30373964  | C | T | 0.94 | -0.45 | 0.10 | 8.2E-06 |
| CK_MB             | 2:134645538 | 2  | 134645538 | G | T | 0.72 | 0.23  | 0.05 | 3.0E-05 |
| CK_MB             | 2:145255527 | 2  | 145255527 | T | C | 0.86 | -0.37 | 0.09 | 1.3E-05 |
| CK_MB             | 2:21476634  | 2  | 21476634  | G | A | 0.88 | -0.32 | 0.08 | 2.5E-05 |
| CK_MB             | 2:236145628 | 2  | 236145628 | A | G | 0.70 | -0.24 | 0.05 | 5.7E-06 |
| CK_MB             | 2:53860097  | 2  | 53860097  | C | T | 0.66 | -0.21 | 0.05 | 4.0E-05 |
| CK_MB             | 2:96410048  | 2  | 96410048  | T | A | 0.68 | 0.25  | 0.06 | 3.0E-05 |
| CK_MB             | 3:35259159  | 3  | 35259159  | A | G | 0.84 | -0.31 | 0.07 | 8.7E-06 |
| CK_MB             | 4:22486548  | 4  | 22486548  | A | C | 0.84 | 0.29  | 0.07 | 2.8E-05 |
| CK_MB             | 4:27623011  | 4  | 27623011  | C | T | 0.72 | 0.23  | 0.05 | 2.0E-05 |
| CK_MB             | 5:136987884 | 5  | 136987884 | T | A | 0.75 | 0.23  | 0.05 | 3.5E-05 |
| CK_MB             | 5:139659153 | 5  | 139659153 | A | G | 0.81 | 0.29  | 0.06 | 4.7E-06 |

|                               |              |    |           |   |   |      |       |      |         |
|-------------------------------|--------------|----|-----------|---|---|------|-------|------|---------|
| CK_MB                         | 6:103820086  | 6  | 103820086 | G | T | 0.62 | 0.23  | 0.05 | 1.6E-05 |
| CK_MB                         | 6:130152296  | 6  | 130152296 | A | G | 0.64 | -0.24 | 0.05 | 1.3E-06 |
| CK_MB                         | 7:126373509  | 7  | 126373509 | C | T | 0.83 | -0.27 | 0.06 | 3.8E-05 |
| CK_MB                         | 7:20280352   | 7  | 20280352  | C | T | 0.90 | 0.42  | 0.10 | 4.8E-05 |
| CK_MB                         | 8:14408424   | 8  | 14408424  | T | C | 0.77 | -0.24 | 0.06 | 4.1E-05 |
| CLC1B                         | 12:10124533  | 12 | 10124533  | T | C | 0.70 | -0.28 | 0.05 | 4.2E-07 |
| CLM6                          | 12:89779344  | 12 | 89779344  | A | G | 0.69 | 0.53  | 0.06 | 8.1E-19 |
| CLM6                          | 12:89897286  | 12 | 89897286  | G | A | 0.64 | -0.37 | 0.06 | 5.9E-10 |
| CLM6                          | 12:89897388  | 12 | 89897388  | C | T | 0.73 | 0.58  | 0.06 | 4.7E-23 |
| CNTN2                         | 1:205001332  | 1  | 205001332 | C | T | 0.93 | -0.74 | 0.12 | 2.0E-09 |
| CNTN2                         | 1:205024012  | 1  | 205024012 | T | C | 0.86 | -0.80 | 0.07 | 2.1E-31 |
| CNTN2                         | 1:205024857  | 1  | 205024857 | T | C | 0.51 | -0.37 | 0.05 | 3.3E-14 |
| CNTN2                         | 1:205034552  | 1  | 205034552 | C | T | 0.87 | -0.44 | 0.07 | 3.5E-09 |
| Coagulation_Factor_V          | 1:169498975  | 1  | 169498975 | T | C | 0.67 | 0.35  | 0.05 | 1.7E-11 |
| Coagulation_Factor_V          | 1:169504321  | 1  | 169504321 | G | T | 0.94 | 0.84  | 0.10 | 8.6E-17 |
| Coagulation_Factor_VII        | 13:113733335 | 13 | 113733335 | C | T | 0.61 | 0.46  | 0.08 | 8.9E-09 |
| Coagulation_Factor_VII        | 13:113743612 | 13 | 113743612 | G | A | 0.82 | 0.87  | 0.09 | 1.5E-21 |
| Coagulation_Factor_VII        | 13:113765235 | 13 | 113765235 | G | A | 0.87 | 1.63  | 0.08 | 7.1E-88 |
| Coagulation_Factor_VII        | 13:113792893 | 13 | 113792893 | A | C | 0.71 | 0.60  | 0.06 | 2.7E-25 |
| Coagulation_Factor_XI         | 3:186439173  | 3  | 186439173 | T | C | 0.71 | 0.30  | 0.05 | 3.0E-08 |
| Coagulation_Factor_XI         | 3:186454180  | 3  | 186454180 | A | C | 0.61 | -0.50 | 0.05 | 1.7E-25 |
| Coagulation_Factor_XI         | 4:187173691  | 4  | 187173691 | A | G | 0.60 | -0.30 | 0.05 | 3.9E-09 |
| Coagulation_Factor_XI         | 4:187204937  | 4  | 187204937 | G | A | 0.89 | 0.51  | 0.09 | 7.1E-09 |
| Coagulation_Factor_XI         | 4:187207381  | 4  | 187207381 | C | T | 0.60 | -0.41 | 0.05 | 1.7E-15 |
| complement_factor_H_related_5 | 1:196675861  | 1  | 196675861 | A | G | 0.61 | 0.53  | 0.05 | 5.1E-26 |
| complement_factor_H_related_5 | 1:196692940  | 1  | 196692940 | T | C | 0.94 | 1.20  | 0.15 | 3.4E-16 |
| complement_factor_H_related_5 | 1:196821120  | 1  | 196821120 | G | A | 0.80 | -0.38 | 0.07 | 5.9E-09 |
| complement_factor_H_related_5 | 1:196946050  | 1  | 196946050 | T | G | 0.83 | 0.53  | 0.07 | 4.1E-13 |
| complement_factor_H_related_5 | 1:197268763  | 1  | 197268763 | C | A | 0.68 | -0.31 | 0.06 | 3.1E-08 |
| contactin_1                   | 16:424420    | 16 | 424420    | G | C | 0.58 | -0.39 | 0.06 | 1.2E-10 |
| contactin_1                   | 8:40652751   | 8  | 40652751  | G | A | 0.49 | -0.27 | 0.05 | 1.1E-07 |
| Contactin_4                   | 2:64614241   | 2  | 64614241  | G | A | 0.95 | 0.89  | 0.15 | 6.1E-09 |
| Contactin_4                   | 3:3094310    | 3  | 3094310   | C | T | 0.87 | -0.43 | 0.08 | 8.2E-08 |
| Contactin_5                   | 10:8472876   | 10 | 8472876   | G | C | 0.64 | -0.30 | 0.05 | 3.8E-08 |
| Contactin_5                   | 11:99049109  | 11 | 99049109  | C | A | 0.62 | -0.29 | 0.05 | 6.7E-09 |
| Contactin_5                   | 11:99054404  | 11 | 99054404  | T | C | 0.93 | -0.73 | 0.10 | 1.3E-13 |
| CPNE1                         | 20:34022387  | 20 | 34022387  | A | C | 0.65 | 0.28  | 0.05 | 3.2E-07 |
| CPNE1                         | 20:34045590  | 20 | 34045590  | A | C | 0.93 | 0.57  | 0.10 | 5.2E-08 |
| CPNE1                         | 20:34155764  | 20 | 34155764  | A | T | 0.92 | 0.75  | 0.10 | 1.9E-13 |
| CPNE1                         | 20:34183479  | 20 | 34183479  | C | T | 0.85 | 0.47  | 0.07 | 3.3E-10 |
| CPNE1                         | 20:34218673  | 20 | 34218673  | G | C | 0.90 | 1.22  | 0.07 | 8.9E-68 |
| CPNE1                         | 20:34712310  | 20 | 34712310  | T | C | 0.72 | 0.43  | 0.06 | 1.7E-11 |

|            |             |    |           |   |   |      |       |      |         |
|------------|-------------|----|-----------|---|---|------|-------|------|---------|
| CPNE1      | 4:67962761  | 4  | 67962761  | T | A | 0.78 | 0.50  | 0.10 | 3.4E-07 |
| Cripto     | 3:46298561  | 3  | 46298561  | C | T | 0.83 | -0.39 | 0.07 | 3.6E-08 |
| Cripto     | 3:46549304  | 3  | 46549304  | G | A | 0.83 | -0.49 | 0.07 | 1.7E-13 |
| Cripto     | 3:46572362  | 3  | 46572362  | A | G | 0.55 | 0.34  | 0.05 | 2.8E-11 |
| Cripto     | 3:46604586  | 3  | 46604586  | A | G | 0.64 | 0.42  | 0.05 | 6.7E-16 |
| Cripto     | 3:46617502  | 3  | 46617502  | T | C | 0.76 | -0.98 | 0.05 | 1.1E-86 |
| Cripto     | 3:46642870  | 3  | 46642870  | G | A | 0.74 | 0.40  | 0.06 | 1.3E-10 |
| Cripto     | 3:46653347  | 3  | 46653347  | A | G | 0.94 | -0.72 | 0.13 | 1.5E-08 |
| Cystatin_C | 20:23618984 | 20 | 23618984  | G | C | 0.79 | 0.40  | 0.06 | 8.2E-12 |
| CYTD       | 20:23767666 | 20 | 23767666  | T | A | 0.63 | -0.33 | 0.05 | 3.3E-10 |
| CYTD       | 20:23848024 | 20 | 23848024  | T | G | 0.78 | 0.40  | 0.07 | 1.8E-08 |
| CYTD       | 20:23859319 | 20 | 23859319  | G | A | 0.83 | -0.71 | 0.06 | 1.7E-28 |
| CYTD       | 20:23862844 | 20 | 23862844  | A | G | 0.67 | -0.33 | 0.05 | 1.2E-09 |
| CYTF       | 20:24902396 | 20 | 24902396  | C | A | 0.70 | 0.46  | 0.06 | 3.3E-13 |
| CYTN       | 20:23645518 | 20 | 23645518  | A | T | 0.54 | 0.29  | 0.06 | 1.4E-07 |
| CYTN       | 20:23707628 | 20 | 23707628  | T | C | 0.93 | 0.60  | 0.10 | 1.0E-08 |
| CYTN       | 20:23719557 | 20 | 23719557  | T | A | 0.67 | -0.40 | 0.05 | 1.2E-13 |
| CYTN       | 20:23728873 | 20 | 23728873  | C | T | 0.71 | 0.63  | 0.05 | 1.6E-32 |
| CYTT       | 20:23646809 | 20 | 23646809  | G | A | 0.54 | 0.33  | 0.05 | 1.4E-09 |
| CYTT       | 20:23719557 | 20 | 23719557  | T | A | 0.67 | -0.41 | 0.05 | 8.9E-15 |
| CYTT       | 20:23728873 | 20 | 23728873  | C | T | 0.71 | 0.57  | 0.05 | 7.7E-27 |
| CYTT       | 20:23731978 | 20 | 23731978  | C | G | 0.91 | 0.63  | 0.11 | 8.4E-09 |
| CYTT       | 20:23852690 | 20 | 23852690  | T | A | 0.73 | 0.32  | 0.06 | 4.7E-08 |
| DAF        | 1:207324781 | 1  | 207324781 | T | C | 0.92 | 0.74  | 0.13 | 1.9E-08 |
| DAF        | 1:207454596 | 1  | 207454596 | G | C | 0.74 | 0.60  | 0.05 | 3.9E-31 |
| DAF        | 1:207486456 | 1  | 207486456 | T | C | 0.93 | 0.79  | 0.11 | 2.7E-12 |
| DAF        | 1:207578284 | 1  | 207578284 | C | T | 0.78 | -0.36 | 0.06 | 3.8E-09 |
| DBNL       | 3:186391274 | 3  | 186391274 | G | A | 0.63 | -0.33 | 0.05 | 1.4E-09 |
| DC_SIGN    | 12:15720249 | 12 | 15720249  | A | G | 0.64 | -0.31 | 0.05 | 1.0E-08 |
| DC_SIGN    | 19:7798733  | 19 | 7798733   | T | G | 0.56 | 0.42  | 0.07 | 1.3E-08 |
| DC_SIGN    | 9:136059310 | 9  | 136059310 | C | T | 0.72 | -0.30 | 0.06 | 4.2E-07 |
| DC_SIGN    | 9:136079654 | 9  | 136079654 | T | C | 0.53 | 0.32  | 0.05 | 9.5E-11 |
| DC_SIGN    | 9:136137106 | 9  | 136137106 | G | A | 0.68 | -0.92 | 0.04 | 2.8E-99 |
| DC_SIGN    | 9:136146310 | 9  | 136146310 | T | C | 0.92 | -0.94 | 0.10 | 9.0E-22 |
| DC_SIGN    | 9:136152070 | 9  | 136152070 | G | C | 0.84 | 0.66  | 0.10 | 3.4E-11 |
| DC_SIGN    | 9:136152722 | 9  | 136152722 | C | T | 0.76 | 0.61  | 0.08 | 5.8E-15 |
| DC_SIGN    | 9:136157037 | 9  | 136157037 | A | C | 0.72 | 0.48  | 0.06 | 2.4E-18 |
| DC_SIGN    | 9:136164593 | 9  | 136164593 | T | G | 0.90 | -0.54 | 0.09 | 6.8E-10 |
| DC_SIGN    | 9:136181848 | 9  | 136181848 | T | C | 0.69 | 0.29  | 0.05 | 1.1E-07 |
| DC_SIGN    | 9:136190948 | 9  | 136190948 | G | A | 0.76 | -0.41 | 0.07 | 1.2E-08 |
| DERM       | 1:168675281 | 1  | 168675281 | C | T | 0.59 | 0.27  | 0.05 | 9.1E-09 |
| DERM       | 1:168697761 | 1  | 168697761 | C | A | 0.56 | 0.36  | 0.05 | 8.2E-14 |

|                             |              |    |           |   |   |      |       |      |         |
|-----------------------------|--------------|----|-----------|---|---|------|-------|------|---------|
| DERM                        | 1:168772240  | 1  | 168772240 | C | T | 0.82 | -0.33 | 0.06 | 1.2E-08 |
| discoidin_domain_receptor_1 | 11:65601560  | 11 | 65601560  | G | C | 0.85 | 0.31  | 0.07 | 1.3E-05 |
| discoidin_domain_receptor_1 | 11:69017797  | 11 | 69017797  | T | C | 0.90 | 0.40  | 0.10 | 3.1E-05 |
| discoidin_domain_receptor_1 | 11:77405141  | 11 | 77405141  | A | T | 0.65 | 0.23  | 0.05 | 8.5E-06 |
| discoidin_domain_receptor_1 | 11:87805299  | 11 | 87805299  | A | G | 0.65 | 0.25  | 0.06 | 9.9E-06 |
| discoidin_domain_receptor_1 | 12:130597843 | 12 | 130597843 | C | T | 0.82 | -0.36 | 0.09 | 3.1E-05 |
| discoidin_domain_receptor_1 | 13:104490794 | 13 | 104490794 | G | A | 0.52 | 0.30  | 0.07 | 3.5E-05 |
| discoidin_domain_receptor_1 | 14:54099700  | 14 | 54099700  | A | G | 0.71 | 0.24  | 0.06 | 4.3E-05 |
| discoidin_domain_receptor_1 | 17:70757476  | 17 | 70757476  | A | T | 0.89 | -0.34 | 0.08 | 1.6E-05 |
| discoidin_domain_receptor_1 | 17:74134628  | 17 | 74134628  | C | G | 0.74 | -0.27 | 0.06 | 2.4E-05 |
| discoidin_domain_receptor_1 | 17:78024094  | 17 | 78024094  | C | T | 0.78 | 0.35  | 0.09 | 4.5E-05 |
| discoidin_domain_receptor_1 | 18:24180890  | 18 | 24180890  | G | A | 0.87 | -0.31 | 0.08 | 3.4E-05 |
| discoidin_domain_receptor_1 | 18:24430032  | 18 | 24430032  | C | A | 0.89 | 0.42  | 0.10 | 4.5E-05 |
| discoidin_domain_receptor_1 | 18:74233107  | 18 | 74233107  | A | T | 0.85 | 0.44  | 0.11 | 3.8E-05 |
| discoidin_domain_receptor_1 | 1:213018174  | 1  | 213018174 | G | A | 0.80 | -0.30 | 0.07 | 5.3E-06 |
| discoidin_domain_receptor_1 | 1:240137811  | 1  | 240137811 | C | T | 0.68 | -0.25 | 0.06 | 3.7E-05 |
| discoidin_domain_receptor_1 | 1:241879743  | 1  | 241879743 | A | G | 0.72 | -0.28 | 0.06 | 7.5E-06 |
| discoidin_domain_receptor_1 | 20:3650234   | 20 | 3650234   | A | G | 0.84 | -0.41 | 0.09 | 1.2E-05 |
| discoidin_domain_receptor_1 | 2:100624490  | 2  | 100624490 | T | C | 0.94 | -0.55 | 0.13 | 2.3E-05 |
| discoidin_domain_receptor_1 | 2:127577208  | 2  | 127577208 | A | G | 0.93 | 0.43  | 0.10 | 2.9E-05 |
| discoidin_domain_receptor_1 | 2:138293642  | 2  | 138293642 | G | A | 0.88 | -0.41 | 0.10 | 2.0E-05 |
| discoidin_domain_receptor_1 | 2:236044977  | 2  | 236044977 | C | T | 0.84 | -0.31 | 0.07 | 6.4E-06 |
| discoidin_domain_receptor_1 | 2:65928857   | 2  | 65928857  | C | A | 0.95 | 0.62  | 0.14 | 1.8E-05 |
| discoidin_domain_receptor_1 | 3:106026316  | 3  | 106026316 | T | C | 0.57 | 0.22  | 0.05 | 2.5E-05 |
| discoidin_domain_receptor_1 | 3:32184517   | 3  | 32184517  | A | T | 0.65 | -0.27 | 0.06 | 3.1E-06 |
| discoidin_domain_receptor_1 | 3:3995771    | 3  | 3995771   | C | G | 0.78 | -0.27 | 0.07 | 3.8E-05 |
| discoidin_domain_receptor_1 | 3:71558889   | 3  | 71558889  | C | T | 0.93 | 0.45  | 0.10 | 6.5E-06 |
| discoidin_domain_receptor_1 | 4:139690326  | 4  | 139690326 | G | A | 0.71 | 0.28  | 0.06 | 2.5E-06 |
| discoidin_domain_receptor_1 | 4:161716303  | 4  | 161716303 | G | C | 0.76 | 0.25  | 0.06 | 3.4E-05 |
| discoidin_domain_receptor_1 | 4:180351563  | 4  | 180351563 | A | G | 0.52 | -0.25 | 0.05 | 1.6E-06 |
| discoidin_domain_receptor_1 | 4:92084600   | 4  | 92084600  | A | G | 0.61 | 0.27  | 0.07 | 4.1E-05 |
| discoidin_domain_receptor_1 | 5:130503286  | 5  | 130503286 | G | A | 0.62 | -0.23 | 0.05 | 1.2E-05 |
| discoidin_domain_receptor_1 | 5:131380658  | 5  | 131380658 | C | T | 0.65 | 0.27  | 0.05 | 3.7E-07 |
| discoidin_domain_receptor_1 | 5:161398542  | 5  | 161398542 | A | G | 0.56 | -0.23 | 0.05 | 8.2E-06 |
| discoidin_domain_receptor_1 | 5:172156007  | 5  | 172156007 | G | A | 0.80 | -0.28 | 0.07 | 1.7E-05 |
| discoidin_domain_receptor_1 | 6:4694899    | 6  | 4694899   | T | C | 0.65 | 0.22  | 0.05 | 3.7E-05 |
| discoidin_domain_receptor_1 | 7:120136968  | 7  | 120136968 | C | G | 0.85 | -0.32 | 0.07 | 7.0E-06 |
| discoidin_domain_receptor_1 | 7:121965266  | 7  | 121965266 | A | G | 0.84 | 0.28  | 0.07 | 3.9E-05 |
| discoidin_domain_receptor_1 | 8:19480023   | 8  | 19480023  | T | G | 0.94 | 0.46  | 0.11 | 2.7E-05 |
| discoidin_domain_receptor_1 | 8:23730212   | 8  | 23730212  | C | G | 0.92 | -0.48 | 0.10 | 3.6E-06 |
| discoidin_domain_receptor_1 | 8:5531336    | 8  | 5531336   | G | T | 0.95 | 0.53  | 0.13 | 2.3E-05 |
| discoidin_domain_receptor_1 | 8:81894604   | 8  | 81894604  | C | A | 0.79 | -0.26 | 0.06 | 4.2E-05 |

|                              |              |    |           |   |   |      |       |      |         |
|------------------------------|--------------|----|-----------|---|---|------|-------|------|---------|
| discoidin_domain_receptor_1  | 9:117803832  | 9  | 117803832 | A | G | 0.80 | 0.29  | 0.06 | 6.2E-06 |
| discoidin_domain_receptor_1  | 9:118109239  | 9  | 118109239 | C | T | 0.87 | 0.32  | 0.08 | 2.4E-05 |
| discoidin_domain_receptor_1  | 9:77957243   | 9  | 77957243  | C | T | 0.55 | -0.30 | 0.07 | 1.3E-05 |
| DKK3                         | 11:82241487  | 11 | 82241487  | C | T | 0.54 | 0.23  | 0.05 | 1.8E-06 |
| DKK3                         | 12:126792793 | 12 | 126792793 | G | A | 0.74 | -0.26 | 0.05 | 2.9E-06 |
| DKK3                         | 16:25035038  | 16 | 25035038  | A | G | 0.91 | -0.48 | 0.10 | 3.1E-06 |
| DKK3                         | 16:86267203  | 16 | 86267203  | G | A | 0.91 | -0.42 | 0.09 | 4.2E-06 |
| DKK3                         | 18:8343115   | 18 | 8343115   | C | T | 0.53 | 0.23  | 0.05 | 2.7E-06 |
| DKK3                         | 3:66824225   | 3  | 66824225  | T | G | 0.83 | -0.33 | 0.07 | 1.2E-06 |
| DnaJ_homolog                 | 3:133494354  | 3  | 133494354 | C | T | 0.84 | 0.54  | 0.07 | 1.3E-15 |
| ECM1                         | 1:150221934  | 1  | 150221934 | C | A | 0.72 | -0.44 | 0.06 | 5.0E-13 |
| ECM1                         | 1:150423577  | 1  | 150423577 | G | A | 0.78 | -0.63 | 0.06 | 3.8E-25 |
| ECM1                         | 1:150456367  | 1  | 150456367 | A | T | 0.79 | -0.45 | 0.06 | 1.1E-14 |
| ECM1                         | 1:150493925  | 1  | 150493925 | C | G | 0.61 | 0.89  | 0.05 | 2.0E-76 |
| ECM1                         | 1:150535196  | 1  | 150535196 | C | T | 0.92 | 1.40  | 0.15 | 3.3E-21 |
| ECM1                         | 1:150618961  | 1  | 150618961 | G | T | 0.59 | 0.33  | 0.05 | 2.0E-11 |
| Elafin                       | 20:43796772  | 20 | 43796772  | C | A | 0.80 | -0.43 | 0.07 | 7.7E-11 |
| Endoglin                     | 9:136142185  | 9  | 136142185 | C | T | 0.92 | -0.60 | 0.10 | 3.8E-10 |
| Endoglin                     | 9:136151806  | 9  | 136151806 | T | C | 0.79 | 0.47  | 0.06 | 3.0E-13 |
| Endothelin_converting_enzyme | 15:60178936  | 15 | 60178936  | G | A | 0.91 | -0.60 | 0.12 | 4.0E-07 |
| Endothelin_converting_enzyme | 15:77841603  | 15 | 77841603  | C | T | 0.89 | 0.40  | 0.08 | 3.0E-07 |
| Endothelin_converting_enzyme | 3:142600252  | 3  | 142600252 | A | G | 0.75 | 0.32  | 0.06 | 2.1E-07 |
| Endothelin_converting_enzyme | 3:142602666  | 3  | 142602666 | C | T | 0.67 | -0.40 | 0.05 | 1.7E-14 |
| ENTP5                        | 14:74299507  | 14 | 74299507  | A | T | 0.75 | 0.54  | 0.06 | 2.9E-17 |
| ENTP5                        | 14:74313283  | 14 | 74313283  | C | G | 0.81 | -0.51 | 0.08 | 2.0E-11 |
| ENTP5                        | 14:74467222  | 14 | 74467222  | G | A | 0.93 | 1.21  | 0.09 | 4.5E-42 |
| ENTP5                        | 14:74509976  | 14 | 74509976  | A | G | 0.53 | 0.40  | 0.05 | 2.7E-13 |
| Eotaxin                      | 3:42876764   | 3  | 42876764  | A | G | 0.60 | 0.36  | 0.05 | 9.0E-11 |
| EphA1                        | 7:143097100  | 7  | 143097100 | G | A | 0.93 | 1.18  | 0.11 | 5.8E-25 |
| EPHB2                        | 1:22993335   | 1  | 22993335  | T | G | 0.51 | 0.26  | 0.05 | 4.0E-07 |
| EPHB2                        | 1:23061551   | 1  | 23061551  | G | A | 0.92 | 0.59  | 0.10 | 1.4E-09 |
| ER                           | 3:186395113  | 3  | 186395113 | A | G | 0.80 | -0.46 | 0.07 | 4.2E-11 |
| ER                           | 3:186395436  | 3  | 186395436 | C | T | 0.77 | 0.55  | 0.06 | 4.4E-21 |
| Esterase_D                   | 13:47332180  | 13 | 47332180  | A | G | 0.67 | 0.30  | 0.06 | 8.7E-08 |
| Esterase_D                   | 13:47342773  | 13 | 47342773  | A | T | 0.90 | 1.08  | 0.08 | 3.0E-40 |
| Esterase_D                   | 13:47401335  | 13 | 47401335  | A | G | 0.73 | 0.46  | 0.06 | 1.8E-15 |
| ETHE1                        | 1:42350417   | 1  | 42350417  | A | G | 0.83 | 0.36  | 0.07 | 1.9E-07 |
| ETHE1                        | 3:186381262  | 3  | 186381262 | T | C | 0.79 | -0.38 | 0.06 | 6.0E-09 |
| Factor_B                     | 1:196679455  | 1  | 196679455 | A | C | 0.58 | -0.26 | 0.05 | 4.2E-07 |
| Factor_B                     | 6:31863168   | 6  | 31863168  | T | C | 0.96 | 0.81  | 0.13 | 6.0E-10 |
| Factor_B                     | 6:31919917   | 6  | 31919917  | T | C | 0.91 | -0.68 | 0.08 | 8.6E-16 |
| Factor_B                     | 6:32156908   | 6  | 32156908  | G | A | 0.76 | -0.31 | 0.06 | 1.2E-07 |

|          |              |    |           |   |   |      |       |      |          |
|----------|--------------|----|-----------|---|---|------|-------|------|----------|
| Factor_H | 1:196545875  | 1  | 196545875 | A | T | 0.85 | -0.77 | 0.10 | 7.2E-16  |
| Factor_H | 1:196679455  | 1  | 196679455 | A | C | 0.58 | -0.61 | 0.05 | 2.3E-36  |
| Factor_H | 1:196715667  | 1  | 196715667 | A | T | 0.83 | 0.63  | 0.07 | 1.3E-17  |
| Factor_H | 1:196951459  | 1  | 196951459 | G | A | 0.83 | -0.40 | 0.07 | 1.0E-08  |
| Factor_I | 4:110659067  | 4  | 110659067 | C | T | 0.52 | 0.34  | 0.06 | 2.2E-09  |
| FCG2A_B  | 10:21004362  | 10 | 21004362  | G | A | 0.64 | -0.23 | 0.05 | 1.6E-05  |
| FCG2A_B  | 10:56388664  | 10 | 56388664  | G | T | 0.80 | 0.35  | 0.08 | 2.1E-05  |
| FCG2A_B  | 10:91932891  | 10 | 91932891  | A | G | 0.70 | 0.31  | 0.07 | 8.5E-06  |
| FCG2A_B  | 11:103573786 | 11 | 103573786 | T | C | 0.53 | 0.22  | 0.05 | 1.0E-05  |
| FCG2A_B  | 11:117430389 | 11 | 117430389 | C | G | 0.92 | -0.44 | 0.09 | 2.8E-06  |
| FCG2A_B  | 12:19176182  | 12 | 19176182  | A | G | 0.66 | 0.24  | 0.06 | 1.7E-05  |
| FCG2A_B  | 12:40323922  | 12 | 40323922  | G | A | 0.74 | 0.26  | 0.06 | 1.8E-05  |
| FCG2A_B  | 14:47546276  | 14 | 47546276  | T | G | 0.81 | -0.28 | 0.07 | 4.0E-05  |
| FCG2A_B  | 14:56817408  | 14 | 56817408  | A | G | 0.50 | -0.22 | 0.05 | 1.5E-05  |
| FCG2A_B  | 14:65246011  | 14 | 65246011  | A | G | 0.95 | -0.47 | 0.11 | 2.2E-05  |
| FCG2A_B  | 15:34946600  | 15 | 34946600  | A | G | 0.93 | 0.45  | 0.11 | 2.9E-05  |
| FCG2A_B  | 15:57928978  | 15 | 57928978  | T | C | 0.84 | 0.29  | 0.07 | 4.9E-05  |
| FCG2A_B  | 16:73333256  | 16 | 73333256  | G | A | 0.70 | 0.24  | 0.06 | 3.4E-05  |
| FCG2A_B  | 17:64548659  | 17 | 64548659  | G | A | 0.93 | -0.41 | 0.10 | 3.2E-05  |
| FCG2A_B  | 17:74942155  | 17 | 74942155  | G | T | 0.74 | 0.32  | 0.08 | 4.1E-05  |
| FCG2A_B  | 18:11322500  | 18 | 11322500  | T | C | 0.84 | 0.36  | 0.07 | 7.7E-07  |
| FCG2A_B  | 18:41224167  | 18 | 41224167  | G | C | 0.68 | -0.25 | 0.05 | 3.1E-06  |
| FCG2A_B  | 1:161132777  | 1  | 161132777 | G | A | 0.94 | 0.57  | 0.13 | 1.0E-05  |
| FCG2A_B  | 1:161406056  | 1  | 161406056 | T | C | 0.74 | 0.60  | 0.07 | 2.2E-16  |
| FCG2A_B  | 1:161455521  | 1  | 161455521 | C | T | 0.81 | 0.60  | 0.09 | 1.2E-11  |
| FCG2A_B  | 1:161473125  | 1  | 161473125 | G | C | 0.90 | 0.56  | 0.09 | 2.5E-09  |
| FCG2A_B  | 1:161479745  | 1  | 161479745 | G | A | 0.50 | 0.86  | 0.04 | 2.3E-94  |
| FCG2A_B  | 1:161641384  | 1  | 161641384 | G | A | 0.82 | -1.72 | 0.05 | 6.1E-230 |
| FCG2A_B  | 1:161653737  | 1  | 161653737 | T | C | 0.90 | 0.37  | 0.09 | 3.7E-05  |
| FCG2A_B  | 1:161664354  | 1  | 161664354 | G | A | 0.57 | 0.77  | 0.06 | 3.6E-40  |
| FCG2A_B  | 1:161675580  | 1  | 161675580 | G | A | 0.60 | -0.50 | 0.06 | 1.1E-18  |
| FCG2A_B  | 1:161678254  | 1  | 161678254 | G | A | 0.54 | 0.22  | 0.05 | 1.7E-05  |
| FCG2A_B  | 1:161710795  | 1  | 161710795 | G | A | 0.94 | -0.89 | 0.10 | 6.8E-19  |
| FCG2A_B  | 1:161720430  | 1  | 161720430 | G | C | 0.70 | 0.37  | 0.06 | 1.6E-10  |
| FCG2A_B  | 1:161738238  | 1  | 161738238 | A | C | 0.76 | 0.32  | 0.07 | 1.2E-05  |
| FCG2A_B  | 1:161843259  | 1  | 161843259 | A | G | 0.93 | -0.49 | 0.12 | 4.2E-05  |
| FCG2A_B  | 1:161955505  | 1  | 161955505 | A | T | 0.77 | -0.33 | 0.07 | 5.8E-07  |
| FCG2A_B  | 1:97029325   | 1  | 97029325  | A | G | 0.58 | -0.23 | 0.05 | 1.7E-05  |
| FCG2A_B  | 20:16650592  | 20 | 16650592  | G | A | 0.94 | 0.48  | 0.11 | 1.8E-05  |
| FCG2A_B  | 20:46302940  | 20 | 46302940  | T | C | 0.47 | 0.23  | 0.05 | 3.0E-05  |
| FCG2A_B  | 2:150463775  | 2  | 150463775 | C | T | 0.88 | -0.33 | 0.08 | 2.8E-05  |
| FCG2A_B  | 3:102561027  | 3  | 102561027 | C | T | 0.89 | -0.35 | 0.09 | 4.6E-05  |



|                      |             |    |           |   |   |      |       |      |         |
|----------------------|-------------|----|-----------|---|---|------|-------|------|---------|
| FCG2A_B              | 3:72033169  | 3  | 72033169  | C | T | 0.53 | -0.23 | 0.05 | 2.1E-05 |
| FCG2A_B              | 3:86163466  | 3  | 86163466  | T | G | 0.92 | 0.44  | 0.09 | 2.6E-06 |
| FCG2A_B              | 4:165680942 | 4  | 165680942 | A | G | 0.54 | 0.27  | 0.05 | 9.9E-08 |
| FCG2A_B              | 4:166187493 | 4  | 166187493 | A | T | 0.94 | 0.54  | 0.11 | 1.3E-06 |
| FCG2A_B              | 4:3262323   | 4  | 3262323   | T | C | 0.62 | -0.23 | 0.05 | 1.6E-05 |
| FCG2A_B              | 4:3411110   | 4  | 3411110   | A | G | 0.77 | 0.25  | 0.06 | 4.2E-05 |
| FCG2A_B              | 4:54555201  | 4  | 54555201  | T | C | 0.52 | -0.28 | 0.06 | 1.6E-05 |
| FCG2A_B              | 5:15696394  | 5  | 15696394  | C | T | 0.95 | -0.49 | 0.11 | 1.6E-05 |
| FCG2A_B              | 5:165472696 | 5  | 165472696 | T | G | 0.96 | -0.48 | 0.11 | 2.9E-05 |
| FCG2A_B              | 5:165625020 | 5  | 165625020 | C | T | 0.90 | -0.47 | 0.11 | 6.7E-06 |
| FCG2A_B              | 6:125479208 | 6  | 125479208 | A | G | 0.57 | 0.25  | 0.05 | 8.5E-07 |
| FCG2A_B              | 6:23539602  | 6  | 23539602  | A | C | 0.90 | 0.46  | 0.09 | 5.3E-07 |
| FCG2A_B              | 8:39498859  | 8  | 39498859  | G | C | 0.63 | 0.23  | 0.05 | 1.8E-05 |
| FCG2A_B              | 9:82929577  | 9  | 82929577  | G | A | 0.86 | 0.34  | 0.08 | 1.9E-05 |
| FCG2A_B              | 9:86150415  | 9  | 86150415  | C | T | 0.71 | 0.23  | 0.06 | 3.8E-05 |
| FCG3B                | 1:161464493 | 1  | 161464493 | T | C | 0.78 | 0.33  | 0.06 | 3.9E-08 |
| FCN2                 | 9:137775084 | 9  | 137775084 | A | G | 0.61 | 0.59  | 0.05 | 7.4E-34 |
| FCN2                 | 9:137778887 | 9  | 137778887 | T | G | 0.89 | 0.82  | 0.07 | 1.5E-28 |
| FCN2                 | 9:137791343 | 9  | 137791343 | C | T | 0.56 | -0.32 | 0.05 | 6.1E-10 |
| FCRL3                | 10:36710823 | 10 | 36710823  | G | A | 0.96 | -0.71 | 0.13 | 1.6E-08 |
| FCRL3                | 1:157686337 | 1  | 157686337 | G | T | 0.56 | -0.33 | 0.05 | 2.1E-10 |
| Ferritin             | 16:72042825 | 16 | 72042825  | G | T | 0.75 | 0.37  | 0.06 | 4.5E-10 |
| Ferritin             | 16:72114002 | 16 | 72114002  | C | T | 0.82 | -0.52 | 0.07 | 1.1E-15 |
| Ferritin             | 16:72144174 | 16 | 72144174  | T | C | 0.81 | -0.44 | 0.07 | 2.5E-10 |
| Ferritin             | 16:72154509 | 16 | 72154509  | C | T | 0.70 | 0.35  | 0.05 | 1.0E-10 |
| Fibronectin          | 2:216300185 | 2  | 216300185 | T | C | 0.74 | 0.56  | 0.06 | 1.1E-22 |
| Ficolin_3            | 1:27710876  | 1  | 27710876  | T | A | 0.89 | 0.67  | 0.08 | 1.6E-15 |
| FN1_3                | 2:216300482 | 2  | 216300482 | A | T | 0.74 | 0.52  | 0.06 | 2.7E-19 |
| FN1_4                | 16:26638600 | 16 | 26638600  | A | G | 0.66 | -0.29 | 0.06 | 2.2E-07 |
| FN1_4                | 2:216300185 | 2  | 216300185 | T | C | 0.74 | 0.31  | 0.06 | 3.0E-07 |
| Fucosyltransferase_3 | 19:5837285  | 19 | 5837285   | T | C | 0.60 | -1.28 | 0.07 | 2.4E-67 |
| Fucosyltransferase_3 | 19:5840926  | 19 | 5840926   | C | A | 0.93 | 0.83  | 0.11 | 2.5E-13 |
| Fucosyltransferase_3 | 19:5844649  | 19 | 5844649   | A | G | 0.80 | 0.96  | 0.05 | 1.6E-73 |
| FUT5                 | 19:5823903  | 19 | 5823903   | G | A | 0.92 | 0.74  | 0.09 | 1.4E-16 |
| FUT5                 | 19:5830302  | 19 | 5830302   | G | A | 0.68 | 0.46  | 0.05 | 9.3E-21 |
| FUT5                 | 19:5841356  | 19 | 5841356   | G | T | 0.94 | 0.76  | 0.10 | 2.3E-13 |
| Galectin_3           | 12:43417914 | 12 | 43417914  | C | A | 0.90 | -0.43 | 0.08 | 2.9E-08 |
| Galectin_3           | 14:55352041 | 14 | 55352041  | T | C | 0.81 | 0.36  | 0.06 | 4.9E-10 |
| Galectin_3           | 14:55581538 | 14 | 55581538  | A | G | 0.92 | 0.74  | 0.08 | 1.2E-18 |
| Galectin_3           | 14:55587552 | 14 | 55587552  | C | T | 0.62 | 0.32  | 0.05 | 8.5E-12 |
| GCP_2                | 3:121411876 | 3  | 121411876 | A | C | 0.62 | 0.26  | 0.05 | 3.7E-07 |
| GCP_2                | 4:74673564  | 4  | 74673564  | T | C | 0.61 | -0.49 | 0.05 | 1.7E-23 |

|                         |              |    |           |   |   |      |       |      |         |
|-------------------------|--------------|----|-----------|---|---|------|-------|------|---------|
| GCP_2                   | 4:74723372   | 4  | 74723372  | T | C | 0.85 | -0.38 | 0.07 | 5.9E-08 |
| G_CSF                   | 19:45448465  | 19 | 45448465  | T | G | 0.65 | -0.67 | 0.08 | 3.9E-17 |
| GFRa_1                  | 10:118027584 | 10 | 118027584 | T | C | 0.76 | -0.29 | 0.06 | 8.2E-07 |
| GFRa_1                  | 16:86437318  | 16 | 86437318  | C | A | 0.70 | -0.27 | 0.06 | 2.6E-06 |
| GFRa_1                  | 3:7956472    | 3  | 7956472   | C | T | 0.90 | -0.41 | 0.08 | 1.4E-07 |
| GFRa_1                  | 4:175743525  | 4  | 175743525 | A | G | 0.63 | 0.25  | 0.05 | 2.9E-06 |
| GFRa_2                  | 8:21473805   | 8  | 21473805  | T | C | 0.57 | 0.27  | 0.05 | 3.1E-07 |
| GFRa_2                  | 8:21502545   | 8  | 21502545  | T | G | 0.58 | -0.30 | 0.06 | 1.2E-07 |
| GFRa_2                  | 8:21525978   | 8  | 21525978  | C | G | 0.58 | -0.54 | 0.05 | 5.5E-23 |
| gp130__soluble          | 5:55248943   | 5  | 55248943  | C | A | 0.88 | -0.73 | 0.08 | 3.4E-19 |
| gp130__soluble          | 5:55294328   | 5  | 55294328  | C | A | 0.56 | -0.44 | 0.07 | 1.3E-09 |
| GPC5                    | 13:92422946  | 13 | 92422946  | G | T | 0.73 | 0.72  | 0.06 | 1.7E-37 |
| GPC5                    | 13:92526445  | 13 | 92526445  | T | A | 0.59 | -0.30 | 0.05 | 5.6E-09 |
| GPC5                    | 13:92681567  | 13 | 92681567  | T | C | 0.73 | 0.45  | 0.06 | 5.7E-13 |
| GPNUMB                  | 7:23211352   | 7  | 23211352  | G | A | 0.62 | 0.31  | 0.05 | 1.7E-09 |
| GPVI                    | 19:55519137  | 19 | 55519137  | A | T | 0.87 | -0.46 | 0.08 | 2.0E-09 |
| GPVI                    | 19:55519248  | 19 | 55519248  | C | T | 0.58 | -0.36 | 0.06 | 2.5E-09 |
| GPVI                    | 19:55529100  | 19 | 55529100  | C | T | 0.59 | 0.46  | 0.06 | 6.4E-17 |
| GPVI                    | 19:55539072  | 19 | 55539072  | G | T | 0.85 | 0.96  | 0.07 | 1.4E-48 |
| GPVI                    | 19:55552217  | 19 | 55552217  | A | G | 0.52 | 0.36  | 0.05 | 3.3E-12 |
| GPVI                    | 19:55564851  | 19 | 55564851  | G | A | 0.89 | -0.46 | 0.09 | 8.2E-08 |
| Granulysin              | 2:85795361   | 2  | 85795361  | G | C | 0.95 | -0.60 | 0.10 | 1.3E-09 |
| Granulysin              | 2:85906280   | 2  | 85906280  | C | T | 0.95 | -0.84 | 0.12 | 5.3E-13 |
| Granulysin              | 2:85910799   | 2  | 85910799  | C | T | 0.86 | -0.72 | 0.08 | 1.4E-19 |
| Granulysin              | 2:85920329   | 2  | 85920329  | T | C | 0.63 | 0.60  | 0.05 | 3.8E-37 |
| Granulysin              | 2:85933003   | 2  | 85933003  | C | T | 0.78 | -0.88 | 0.05 | 1.6E-65 |
| Granulysin              | 2:85946999   | 2  | 85946999  | G | T | 0.80 | -0.39 | 0.06 | 2.1E-10 |
| GRN                     | 1:109807099  | 1  | 109807099 | G | A | 0.55 | -0.48 | 0.06 | 7.3E-15 |
| GRN                     | 1:109817192  | 1  | 109817192 | A | G | 0.78 | 0.84  | 0.05 | 7.4E-59 |
| GRN                     | 1:109830993  | 1  | 109830993 | C | T | 0.93 | 0.61  | 0.09 | 1.4E-11 |
| Gro_a                   | 4:74727832   | 4  | 74727832  | G | A | 0.94 | -1.06 | 0.13 | 1.4E-15 |
| Gro_a                   | 4:74740169   | 4  | 74740169  | C | G | 0.76 | -0.65 | 0.05 | 1.1E-33 |
| HAI_1                   | 1:39297734   | 1  | 39297734  | T | C | 0.53 | 0.46  | 0.06 | 6.2E-17 |
| Haptoglobin__Mixed_Type | 16:70724001  | 16 | 70724001  | G | T | 0.93 | -0.84 | 0.14 | 3.7E-09 |
| Haptoglobin__Mixed_Type | 16:71284108  | 16 | 71284108  | T | C | 0.94 | -0.69 | 0.10 | 3.3E-11 |
| Haptoglobin__Mixed_Type | 16:71347595  | 16 | 71347595  | C | T | 0.74 | -0.41 | 0.06 | 1.7E-12 |
| Haptoglobin__Mixed_Type | 16:71635836  | 16 | 71635836  | A | C | 0.51 | -0.47 | 0.05 | 3.0E-20 |
| Haptoglobin__Mixed_Type | 16:71697015  | 16 | 71697015  | T | G | 0.95 | -0.86 | 0.13 | 3.1E-11 |
| Haptoglobin__Mixed_Type | 16:71877000  | 16 | 71877000  | C | T | 0.89 | 0.55  | 0.09 | 2.5E-10 |
| Haptoglobin__Mixed_Type | 16:72042825  | 16 | 72042825  | G | T | 0.75 | 0.44  | 0.06 | 2.4E-14 |
| Haptoglobin__Mixed_Type | 16:72052348  | 16 | 72052348  | A | G | 0.78 | 0.68  | 0.06 | 1.8E-30 |
| Haptoglobin__Mixed_Type | 16:72077598  | 16 | 72077598  | G | C | 0.87 | 0.54  | 0.08 | 3.6E-12 |

|                         |             |    |           |   |   |      |       |      |         |
|-------------------------|-------------|----|-----------|---|---|------|-------|------|---------|
| Haptoglobin__Mixed_Type | 16:72114002 | 16 | 72114002  | C | T | 0.82 | -1.05 | 0.06 | 3.1E-75 |
| Haptoglobin__Mixed_Type | 16:72144174 | 16 | 72144174  | T | C | 0.81 | -0.77 | 0.07 | 4.0E-32 |
| Haptoglobin__Mixed_Type | 16:72154509 | 16 | 72154509  | C | T | 0.70 | 0.57  | 0.05 | 9.0E-28 |
| Haptoglobin__Mixed_Type | 16:72252752 | 16 | 72252752  | A | G | 0.64 | 0.47  | 0.06 | 1.5E-17 |
| Haptoglobin__Mixed_Type | 16:72268928 | 16 | 72268928  | C | T | 0.81 | 0.41  | 0.06 | 5.7E-11 |
| Haptoglobin__Mixed_Type | 16:72294623 | 16 | 72294623  | G | C | 0.94 | -1.01 | 0.13 | 6.5E-15 |
| Haptoglobin__Mixed_Type | 16:72500483 | 16 | 72500483  | T | C | 0.88 | 0.54  | 0.08 | 3.8E-11 |
| HCC_1                   | 17:34317595 | 17 | 34317595  | G | A | 0.88 | 0.55  | 0.09 | 1.6E-09 |
| HCC_1                   | 17:34335694 | 17 | 34335694  | C | T | 0.88 | 1.01  | 0.07 | 6.3E-47 |
| HCC_4                   | 17:34303312 | 17 | 34303312  | T | C | 0.94 | 1.65  | 0.11 | 4.6E-55 |
| HCC_4                   | 17:34317595 | 17 | 34317595  | G | A | 0.88 | 0.64  | 0.09 | 4.7E-13 |
| HCC_4                   | 17:34321277 | 17 | 34321277  | C | T | 0.89 | 0.65  | 0.10 | 1.0E-11 |
| HCC_4                   | 7:47704636  | 7  | 47704636  | T | C | 0.62 | -0.27 | 0.06 | 2.1E-06 |
| HCG                     | 19:49458262 | 19 | 49458262  | T | C | 0.85 | -0.43 | 0.06 | 3.7E-12 |
| HCG                     | 19:49517925 | 19 | 49517925  | C | T | 0.91 | -1.10 | 0.07 | 3.0E-51 |
| HCG                     | 19:49519230 | 19 | 49519230  | T | G | 0.51 | 0.27  | 0.04 | 1.3E-09 |
| Hemopexin               | 1:196102490 | 1  | 196102490 | G | A | 0.51 | -0.27 | 0.05 | 1.5E-07 |
| Hemopexin               | 1:196248826 | 1  | 196248826 | G | A | 0.72 | 0.55  | 0.06 | 1.8E-20 |
| Hemopexin               | 1:196672473 | 1  | 196672473 | T | C | 0.63 | -0.33 | 0.05 | 1.3E-09 |
| Hemopexin               | 1:196886223 | 1  | 196886223 | C | T | 0.86 | -1.35 | 0.08 | 1.5E-69 |
| Hemopexin               | 1:196887457 | 1  | 196887457 | G | A | 0.89 | 1.02  | 0.07 | 2.2E-42 |
| Hemopexin               | 1:196920299 | 1  | 196920299 | T | A | 0.75 | 0.88  | 0.06 | 3.0E-56 |
| Hemopexin               | 1:197101621 | 1  | 197101621 | C | T | 0.48 | -0.46 | 0.05 | 1.1E-19 |
| Hemopexin               | 1:197130983 | 1  | 197130983 | A | T | 0.90 | -0.69 | 0.12 | 2.3E-08 |
| Hemopexin               | 1:197197708 | 1  | 197197708 | A | G | 0.81 | -0.37 | 0.07 | 2.0E-08 |
| Hemopexin               | 1:197308081 | 1  | 197308081 | G | T | 0.95 | -0.81 | 0.13 | 8.0E-10 |
| Hemopexin               | 1:197799364 | 1  | 197799364 | C | T | 0.92 | -0.52 | 0.10 | 3.6E-07 |
| Hemopexin               | 1:197915297 | 1  | 197915297 | G | T | 0.82 | -0.41 | 0.07 | 9.0E-10 |
| Heparin_cofactor_II     | 16:72114002 | 16 | 72114002  | C | T | 0.82 | -0.49 | 0.06 | 4.6E-14 |
| HGFA                    | 4:3048207   | 4  | 3048207   | T | C | 0.50 | 0.30  | 0.05 | 4.6E-09 |
| HGFA                    | 4:3271982   | 4  | 3271982   | G | C | 0.76 | 0.45  | 0.06 | 1.0E-12 |
| HGFA                    | 4:3434885   | 4  | 3434885   | G | T | 0.57 | 0.55  | 0.07 | 3.0E-14 |
| HGFA                    | 4:3439604   | 4  | 3439604   | G | A | 0.79 | -0.68 | 0.11 | 1.9E-10 |
| HGFA                    | 4:3447156   | 4  | 3447156   | C | T | 0.75 | -0.77 | 0.09 | 8.2E-19 |
| HGFA                    | 4:3449781   | 4  | 3449781   | G | A | 0.92 | 1.24  | 0.13 | 1.3E-21 |
| HGFA                    | 4:3451109   | 4  | 3451109   | G | A | 0.90 | 1.92  | 0.10 | 4.0E-88 |
| HGFA                    | 4:3464667   | 4  | 3464667   | C | A | 0.65 | 0.35  | 0.06 | 1.5E-09 |
| HGFA                    | 4:3478851   | 4  | 3478851   | G | C | 0.59 | 1.16  | 0.07 | 1.2E-57 |
| HGFA                    | 4:3485786   | 4  | 3485786   | G | A | 0.56 | 0.56  | 0.09 | 4.9E-11 |
| HGFA                    | 4:3493014   | 4  | 3493014   | G | A | 0.82 | 0.91  | 0.07 | 5.7E-34 |
| HRG                     | 3:186390627 | 3  | 186390627 | C | T | 0.65 | -0.78 | 0.05 | 7.9E-66 |
| HRG                     | 3:186440483 | 3  | 186440483 | C | T | 0.73 | 0.32  | 0.06 | 4.4E-08 |

|                 |              |    |           |   |   |      |       |      |         |
|-----------------|--------------|----|-----------|---|---|------|-------|------|---------|
| IDUA            | 12:102091379 | 12 | 102091379 | G | C | 0.60 | 0.39  | 0.06 | 3.9E-12 |
| IDUA            | 4:875671     | 4  | 875671    | T | C | 0.82 | 0.50  | 0.07 | 1.2E-12 |
| IGFBP_3         | 7:46010100   | 7  | 46010100  | C | G | 0.54 | -0.35 | 0.05 | 2.6E-13 |
| IGFBP_7         | 4:57939654   | 4  | 57939654  | G | A | 0.81 | -0.38 | 0.06 | 1.1E-09 |
| IGF_II_receptor | 6:160432331  | 6  | 160432331 | T | A | 0.83 | -0.38 | 0.07 | 5.7E-08 |
| IGF_II_receptor | 6:160469099  | 6  | 160469099 | T | A | 0.51 | -0.46 | 0.05 | 6.5E-20 |
| IGF_II_receptor | 6:160494409  | 6  | 160494409 | G | A | 0.88 | 1.12  | 0.07 | 1.2E-56 |
| IGF_II_receptor | 6:160503894  | 6  | 160503894 | C | T | 0.85 | -0.90 | 0.07 | 5.5E-43 |
| IGF_II_receptor | 6:160552254  | 6  | 160552254 | G | T | 0.64 | 0.44  | 0.05 | 7.1E-17 |
| IGF_II_receptor | 6:160552803  | 6  | 160552803 | C | T | 0.93 | -0.55 | 0.09 | 2.5E-09 |
| IGF_II_receptor | 6:160570083  | 6  | 160570083 | C | T | 0.65 | 0.58  | 0.05 | 3.6E-33 |
| IL_10_Rb        | 21:34640788  | 21 | 34640788  | A | G | 0.75 | 0.27  | 0.06 | 3.4E-06 |
| IL_10_Rb        | 6:48673386   | 6  | 48673386  | G | A | 0.91 | -0.39 | 0.08 | 3.3E-06 |
| IL_10_Rb        | 7:79335537   | 7  | 79335537  | A | G | 0.51 | -0.29 | 0.06 | 2.8E-06 |
| IL_10_Rb        | 7:85005259   | 7  | 85005259  | G | A | 0.70 | -0.27 | 0.06 | 2.8E-06 |
| IL_11_RA        | 9:34684612   | 9  | 34684612  | G | T | 0.94 | -0.71 | 0.12 | 1.1E-09 |
| IL_12_Rb1       | 19:18157591  | 19 | 18157591  | C | G | 0.90 | 0.61  | 0.10 | 3.0E-09 |
| IL_12_Rb1       | 19:18180451  | 19 | 18180451  | A | G | 0.69 | 0.69  | 0.05 | 8.6E-47 |
| IL_12_Rb1       | 19:18214521  | 19 | 18214521  | T | C | 0.73 | 0.46  | 0.07 | 2.0E-10 |
| IL_15_Ra        | 10:6005674   | 10 | 6005674   | A | G | 0.78 | 0.37  | 0.07 | 2.1E-08 |
| IL_15_Ra        | 9:85389912   | 9  | 85389912  | A | G | 0.93 | 0.62  | 0.12 | 9.5E-08 |
| IL_17B_R        | 2:60073547   | 2  | 60073547  | A | G | 0.89 | 0.40  | 0.08 | 1.7E-07 |
| IL_17B_R        | 3:53811341   | 3  | 53811341  | G | A | 0.74 | -0.36 | 0.06 | 3.1E-10 |
| IL_17B_R        | 3:53877149   | 3  | 53877149  | T | G | 0.62 | -0.43 | 0.05 | 1.3E-17 |
| IL_17B_R        | 4:161340537  | 4  | 161340537 | G | A | 0.93 | -0.55 | 0.10 | 1.9E-08 |
| IL_17E          | 11:119950934 | 11 | 119950934 | T | C | 0.79 | -0.41 | 0.06 | 2.7E-10 |
| IL_17E          | 11:120042082 | 11 | 120042082 | G | A | 0.94 | -0.87 | 0.11 | 1.6E-16 |
| IL_17E          | 11:120099679 | 11 | 120099679 | A | G | 0.80 | -0.85 | 0.06 | 8.2E-46 |
| IL_17E          | 11:120122394 | 11 | 120122394 | A | G | 0.93 | -0.51 | 0.10 | 1.7E-07 |
| IL_17E          | 11:120135501 | 11 | 120135501 | C | A | 0.75 | -0.41 | 0.06 | 2.2E-12 |
| IL_17_RD        | 3:57085010   | 3  | 57085010  | C | T | 0.64 | -0.33 | 0.05 | 3.5E-10 |
| IL_17_RD        | 3:57130981   | 3  | 57130981  | T | G | 0.84 | -0.76 | 0.06 | 4.0E-36 |
| IL_17_RD        | 3:57158196   | 3  | 57158196  | C | T | 0.56 | 0.34  | 0.05 | 6.3E-11 |
| IL_17_RD        | 3:57690473   | 3  | 57690473  | T | G | 0.75 | -0.36 | 0.06 | 4.6E-09 |
| IL_17_sR        | 14:21791000  | 14 | 21791000  | A | T | 0.75 | 0.28  | 0.06 | 1.3E-06 |
| IL_17_sR        | 15:57855222  | 15 | 57855222  | T | C | 0.80 | 0.34  | 0.07 | 2.3E-06 |
| IL_17_sR        | 17:17431671  | 17 | 17431671  | G | C | 0.92 | 0.55  | 0.10 | 5.7E-08 |
| IL_17_sR        | 22:17587659  | 22 | 17587659  | G | A | 0.89 | 0.76  | 0.08 | 5.7E-20 |
| IL_17_sR        | 22:17591823  | 22 | 17591823  | C | G | 0.85 | 0.84  | 0.06 | 3.5E-40 |
| IL_17_sR        | 22:17595915  | 22 | 17595915  | C | A | 0.77 | -0.99 | 0.05 | 3.2E-77 |
| IL_17_sR        | 22:17615213  | 22 | 17615213  | A | G | 0.62 | 0.40  | 0.06 | 7.1E-13 |
| IL_17_sR        | 22:17616715  | 22 | 17616715  | C | T | 0.64 | 0.31  | 0.06 | 1.7E-08 |

|            |              |    |           |   |   |      |       |      |          |
|------------|--------------|----|-----------|---|---|------|-------|------|----------|
| IL_17_sR   | 22:17633837  | 22 | 17633837  | C | T | 0.94 | 0.63  | 0.12 | 5.7E-08  |
| IL_17_sR   | 22:17658341  | 22 | 17658341  | A | G | 0.51 | -0.27 | 0.05 | 5.7E-07  |
| IL_18_Ra   | 2:102800046  | 2  | 102800046 | G | A | 0.81 | -0.46 | 0.07 | 2.4E-12  |
| IL_18_Ra   | 2:102860411  | 2  | 102860411 | C | T | 0.65 | -0.30 | 0.05 | 3.3E-08  |
| IL_18_Ra   | 2:102966310  | 2  | 102966310 | G | A | 0.71 | 0.31  | 0.05 | 9.4E-09  |
| IL_18_Ra   | 2:102982276  | 2  | 102982276 | C | G | 0.89 | 0.57  | 0.08 | 1.6E-11  |
| IL_18_Ra   | 2:102989734  | 2  | 102989734 | G | A | 0.75 | -0.85 | 0.05 | 1.8E-57  |
| IL_18_Ra   | 2:103082906  | 2  | 103082906 | G | A | 0.71 | 0.52  | 0.06 | 7.5E-21  |
| IL_18_Ra   | 2:103207806  | 2  | 103207806 | T | C | 0.57 | 0.33  | 0.05 | 2.2E-10  |
| IL_18_Ra   | 2:103212037  | 2  | 103212037 | T | C | 0.92 | -0.63 | 0.11 | 3.2E-09  |
| IL_18_Ra   | 2:103235516  | 2  | 103235516 | A | G | 0.94 | -0.63 | 0.10 | 1.1E-09  |
| IL_18_Rb   | 2:103087641  | 2  | 103087641 | C | T | 0.70 | -0.43 | 0.06 | 9.6E-15  |
| IL_19      | 14:80371582  | 14 | 80371582  | T | A | 0.61 | -0.25 | 0.05 | 3.8E-06  |
| IL_19      | 2:3645429    | 2  | 3645429   | C | T | 0.74 | 0.29  | 0.06 | 6.6E-07  |
| IL_19      | 5:122732236  | 5  | 122732236 | C | T | 0.71 | -0.29 | 0.06 | 2.8E-07  |
| IL_19      | 7:12850931   | 7  | 12850931  | C | G | 0.59 | -0.24 | 0.05 | 2.8E-06  |
| IL_1a      | 13:46655501  | 13 | 46655501  | C | T | 0.73 | 0.28  | 0.06 | 3.9E-07  |
| IL_1a      | 1:93487836   | 1  | 93487836  | C | T | 0.80 | -0.34 | 0.07 | 1.9E-07  |
| IL_1_R4    | 2:102750428  | 2  | 102750428 | G | T | 0.87 | 0.47  | 0.07 | 2.7E-10  |
| IL_1_R4    | 2:102840667  | 2  | 102840667 | C | T | 0.87 | 0.41  | 0.07 | 2.8E-09  |
| IL_1_R4    | 2:102907630  | 2  | 102907630 | C | T | 0.66 | -0.33 | 0.05 | 2.1E-10  |
| IL_1_R4    | 2:102927649  | 2  | 102927649 | A | G | 0.93 | -0.71 | 0.09 | 6.7E-15  |
| IL_1_R4    | 2:102929865  | 2  | 102929865 | G | A | 0.89 | 0.63  | 0.08 | 9.0E-15  |
| IL_1_R4    | 2:102941338  | 2  | 102941338 | C | T | 0.63 | -0.74 | 0.04 | 6.4E-65  |
| IL_1_R4    | 2:102966310  | 2  | 102966310 | G | A | 0.71 | -0.33 | 0.05 | 3.9E-11  |
| IL_1_R4    | 2:103092503  | 2  | 103092503 | C | T | 0.76 | 0.56  | 0.06 | 1.8E-23  |
| IL_1_R4    | 2:103207806  | 2  | 103207806 | T | C | 0.57 | 0.28  | 0.05 | 6.9E-09  |
| IL_1_R4    | 2:103215410  | 2  | 103215410 | C | T | 0.86 | -0.48 | 0.07 | 1.8E-12  |
| IL_1_R4    | 2:103245025  | 2  | 103245025 | G | A | 0.84 | -0.40 | 0.06 | 1.5E-10  |
| IL_1_R_AcP | 10:133152836 | 10 | 133152836 | A | T | 0.85 | 0.38  | 0.08 | 4.6E-06  |
| IL_1_R_AcP | 13:106079978 | 13 | 106079978 | C | G | 0.85 | -0.43 | 0.08 | 4.3E-08  |
| IL_1_R_AcP | 18:59346842  | 18 | 59346842  | C | T | 0.89 | 0.39  | 0.08 | 2.1E-06  |
| IL_1_R_AcP | 3:190314468  | 3  | 190314468 | C | T | 0.53 | 0.35  | 0.05 | 8.7E-13  |
| IL_1_R_AcP | 3:190347681  | 3  | 190347681 | T | C | 0.86 | -1.34 | 0.05 | 4.3E-159 |
| IL_1_R_AcP | 3:190357571  | 3  | 190357571 | A | G | 0.84 | 0.57  | 0.07 | 1.3E-15  |
| IL_1_R_AcP | 3:190358776  | 3  | 190358776 | C | T | 0.94 | -0.97 | 0.10 | 7.4E-21  |
| IL_1_R_AcP | 3:55189726   | 3  | 55189726  | A | G | 0.56 | 0.31  | 0.06 | 1.7E-06  |
| IL_1_R_AcP | 6:72497090   | 6  | 72497090  | T | C | 0.57 | 0.24  | 0.05 | 1.6E-06  |
| IL_1Rrp2   | 2:102802255  | 2  | 102802255 | C | T | 0.72 | -0.30 | 0.06 | 7.3E-08  |
| IL_1Rrp2   | 2:102805218  | 2  | 102805218 | T | G | 0.93 | 0.58  | 0.10 | 3.3E-09  |
| IL_1Rrp2   | 2:102816695  | 2  | 102816695 | T | C | 0.60 | -0.30 | 0.05 | 6.2E-09  |
| IL_1Rrp2   | 6:31081746   | 6  | 31081746  | C | T | 0.81 | 0.32  | 0.06 | 2.9E-07  |

|               |              |    |           |   |   |      |       |      |          |
|---------------|--------------|----|-----------|---|---|------|-------|------|----------|
| IL_1_sRI      | 2:113832312  | 2  | 113832312 | C | T | 0.60 | 0.29  | 0.05 | 1.4E-08  |
| IL_23_R       | 4:80833795   | 4  | 80833795  | C | T | 0.57 | -0.30 | 0.05 | 5.8E-09  |
| IL_23_R       | 9:83055876   | 9  | 83055876  | G | A | 0.69 | 0.28  | 0.06 | 2.7E-07  |
| IL_27         | 16:28593347  | 16 | 28593347  | T | C | 0.66 | 0.27  | 0.05 | 2.6E-07  |
| IL_5          | 10:15389209  | 10 | 15389209  | T | C | 0.56 | 0.26  | 0.05 | 1.1E-06  |
| IL_5          | 11:101940692 | 11 | 101940692 | T | G | 0.94 | 0.49  | 0.11 | 3.6E-06  |
| IL_5          | 17:26694861  | 17 | 26694861  | G | A | 0.49 | 0.27  | 0.06 | 2.0E-06  |
| IL_5          | 7:7856297    | 7  | 7856297   | C | G | 0.90 | -0.42 | 0.09 | 3.1E-06  |
| IL_5_Ra       | 3:3155047    | 3  | 3155047   | T | G | 0.83 | -0.42 | 0.07 | 3.7E-09  |
| IL_6_sRa      | 1:154364317  | 1  | 154364317 | G | T | 0.83 | -0.50 | 0.07 | 9.8E-13  |
| IL_6_sRa      | 1:154414296  | 1  | 154414296 | C | T | 0.59 | -1.26 | 0.03 | 0.0E+00  |
| IL_6_sRa      | 1:154435346  | 1  | 154435346 | T | C | 0.77 | 0.77  | 0.06 | 1.8E-41  |
| IL_6_sRa      | 1:154505106  | 1  | 154505106 | C | T | 0.83 | 0.67  | 0.08 | 2.7E-19  |
| IL_6_sRa      | 1:154556425  | 1  | 154556425 | G | A | 0.51 | -0.32 | 0.05 | 1.8E-10  |
| IL_6_sRa      | 1:154622234  | 1  | 154622234 | T | C | 0.83 | 0.41  | 0.07 | 3.7E-09  |
| IL_6_sRa      | 1:154630498  | 1  | 154630498 | T | C | 0.72 | -0.52 | 0.05 | 2.8E-21  |
| IL_6_sRa      | 1:154633513  | 1  | 154633513 | G | T | 0.77 | 0.53  | 0.08 | 2.0E-12  |
| ILT_2         | 19:55103603  | 19 | 55103603  | T | C | 0.83 | 1.02  | 0.08 | 1.8E-38  |
| ILT_2         | 19:55109883  | 19 | 55109883  | A | C | 0.76 | -0.55 | 0.08 | 1.6E-12  |
| ILT_2         | 19:55118117  | 19 | 55118117  | G | A | 0.94 | -1.07 | 0.13 | 4.5E-17  |
| ILT_2         | 19:55147445  | 19 | 55147445  | G | C | 0.95 | 2.40  | 0.12 | 4.0E-82  |
| ILT_4         | 19:54793830  | 19 | 54793830  | G | C | 0.81 | 1.52  | 0.06 | 1.3E-142 |
| IR            | 9:136049780  | 9  | 136049780 | A | G | 0.73 | 0.30  | 0.06 | 9.2E-08  |
| IR            | 9:136084941  | 9  | 136084941 | T | C | 0.56 | -0.37 | 0.07 | 8.0E-08  |
| IR            | 9:136139297  | 9  | 136139297 | C | T | 0.60 | -0.30 | 0.05 | 1.6E-08  |
| IR            | 9:136151806  | 9  | 136151806 | T | C | 0.79 | 0.77  | 0.06 | 2.3E-35  |
| IR            | 9:136155359  | 9  | 136155359 | G | A | 0.62 | -0.38 | 0.07 | 2.4E-08  |
| IR            | 9:136163447  | 9  | 136163447 | T | C | 0.77 | -0.46 | 0.08 | 4.3E-09  |
| IR            | 9:136164593  | 9  | 136164593 | T | G | 0.90 | 0.47  | 0.09 | 1.0E-07  |
| JAG1          | 4:72618334   | 4  | 72618334  | C | A | 0.57 | 0.25  | 0.05 | 3.3E-07  |
| JAG1          | 9:136151806  | 9  | 136151806 | T | C | 0.79 | 0.37  | 0.07 | 1.1E-08  |
| Kallikrein_11 | 19:51514622  | 19 | 51514622  | C | T | 0.61 | -0.34 | 0.06 | 1.9E-09  |
| Kallikrein_11 | 19:51523277  | 19 | 51523277  | A | G | 0.72 | 0.77  | 0.07 | 2.5E-31  |
| Kallikrein_11 | 19:51527364  | 19 | 51527364  | G | A | 0.91 | 1.34  | 0.08 | 5.2E-67  |
| kallikrein_12 | 19:51535130  | 19 | 51535130  | G | A | 0.58 | -0.79 | 0.07 | 6.4E-27  |
| kallikrein_12 | 19:51538154  | 19 | 51538154  | G | T | 0.49 | 0.30  | 0.05 | 2.5E-08  |
| Kallikrein_7  | 19:51485194  | 19 | 51485194  | T | C | 0.90 | 0.60  | 0.09 | 3.2E-12  |
| Kallistatin   | 14:94987551  | 14 | 94987551  | T | A | 0.77 | -0.36 | 0.06 | 1.2E-08  |
| Kallistatin   | 14:95024482  | 14 | 95024482  | C | A | 0.77 | 0.54  | 0.06 | 1.8E-19  |
| Kallistatin   | 14:95035374  | 14 | 95035374  | G | A | 0.77 | -0.65 | 0.06 | 2.5E-29  |
| Kallistatin   | 1:38984339   | 1  | 38984339  | C | T | 0.74 | -0.32 | 0.06 | 2.9E-08  |
| KI2L4         | 19:55378490  | 19 | 55378490  | A | G | 0.57 | 0.36  | 0.05 | 9.7E-13  |

|                     |              |    |           |   |   |      |       |      |         |
|---------------------|--------------|----|-----------|---|---|------|-------|------|---------|
| KI2L4               | 1:224423738  | 1  | 224423738 | A | G | 0.92 | 0.98  | 0.16 | 3.0E-09 |
| Kininogen__HMW      | 3:186438648  | 3  | 186438648 | G | A | 0.64 | 0.64  | 0.05 | 6.0E-35 |
| Kininogen__HMW      | 3:186442544  | 3  | 186442544 | G | C | 0.59 | -0.32 | 0.05 | 8.0E-10 |
| Kininogen__HMW      | 3:186445052  | 3  | 186445052 | T | G | 0.89 | 1.37  | 0.07 | 7.4E-81 |
| Kininogen__HMW      | 3:186464107  | 3  | 186464107 | C | T | 0.74 | -0.41 | 0.07 | 2.7E-09 |
| Kininogen__HMW      | 3:186466858  | 3  | 186466858 | A | G | 0.65 | 0.43  | 0.06 | 8.4E-15 |
| KYNU                | 2:143808067  | 2  | 143808067 | G | A | 0.82 | 0.95  | 0.06 | 2.8E-50 |
| Layilin             | 11:111384426 | 11 | 111384426 | T | G | 0.86 | -0.41 | 0.08 | 1.6E-07 |
| Layilin             | 11:111425658 | 11 | 111425658 | A | C | 0.61 | 0.28  | 0.05 | 3.4E-08 |
| Layilin             | 11:111661455 | 11 | 111661455 | G | C | 0.60 | -0.26 | 0.05 | 3.4E-07 |
| Layilin             | 1:231186593  | 1  | 231186593 | G | A | 0.89 | 0.43  | 0.08 | 2.4E-07 |
| LCMT1               | 3:186450863  | 3  | 186450863 | T | C | 0.90 | -0.56 | 0.09 | 5.7E-10 |
| Luteinizing_hormone | 19:49458262  | 19 | 49458262  | T | C | 0.85 | 0.39  | 0.06 | 2.5E-11 |
| Luteinizing_hormone | 19:49504458  | 19 | 49504458  | G | A | 0.92 | 0.83  | 0.07 | 6.0E-32 |
| LY9                 | 14:70498141  | 14 | 70498141  | G | A | 0.85 | -0.36 | 0.07 | 3.3E-07 |
| LY9                 | 1:160762784  | 1  | 160762784 | T | G | 0.80 | -0.33 | 0.06 | 1.1E-07 |
| Lysozyme            | 12:69655167  | 12 | 69655167  | G | A | 0.71 | -0.46 | 0.05 | 4.8E-18 |
| Lysozyme            | 12:69732105  | 12 | 69732105  | T | C | 0.52 | 0.71  | 0.05 | 7.8E-54 |
| Lysozyme            | 12:69744014  | 12 | 69744014  | C | A | 0.94 | -1.21 | 0.10 | 2.3E-35 |
| Lysozyme            | 12:69827409  | 12 | 69827409  | G | C | 0.89 | -0.47 | 0.08 | 1.4E-08 |
| Lysozyme            | 12:70025971  | 12 | 70025971  | C | T | 0.74 | 0.33  | 0.06 | 3.1E-08 |
| MAPKAPK3            | 13:46536291  | 13 | 46536291  | A | G | 0.94 | -1.54 | 0.17 | 2.8E-20 |
| MAPKAPK3            | 13:46582743  | 13 | 46582743  | T | A | 0.94 | 0.77  | 0.15 | 1.9E-07 |
| MAPKAPK3            | 13:46626461  | 13 | 46626461  | G | T | 0.71 | 0.54  | 0.06 | 9.1E-22 |
| MAPKAPK3            | 13:46627677  | 13 | 46627677  | C | T | 0.94 | -1.39 | 0.12 | 2.3E-31 |
| MAPKAPK3            | 13:46629944  | 13 | 46629944  | G | A | 0.69 | -1.26 | 0.03 | 0.0E+00 |
| MAPKAPK3            | 13:46670710  | 13 | 46670710  | C | T | 0.66 | 0.82  | 0.06 | 1.4E-48 |
| MAPKAPK3            | 13:46706598  | 13 | 46706598  | C | A | 0.56 | 0.43  | 0.05 | 3.8E-18 |
| MAPKAPK3            | 13:46708291  | 13 | 46708291  | C | T | 0.90 | -0.44 | 0.08 | 2.2E-08 |
| MAPKAPK3            | 13:46711447  | 13 | 46711447  | C | T | 0.76 | 0.32  | 0.06 | 6.8E-08 |
| MAPKAPK3            | 13:46747184  | 13 | 46747184  | A | G | 0.75 | -0.44 | 0.07 | 2.4E-09 |
| MASP3               | 1:161217024  | 1  | 161217024 | G | A | 0.94 | 0.66  | 0.11 | 2.1E-09 |
| MASP3               | 2:180729601  | 2  | 180729601 | T | G | 0.64 | -0.31 | 0.05 | 6.5E-09 |
| MASP3               | 6:158521159  | 6  | 158521159 | G | A | 0.87 | -0.48 | 0.09 | 4.6E-08 |
| MBL                 | 10:48577553  | 10 | 48577553  | T | A | 0.81 | 0.33  | 0.06 | 5.6E-07 |
| MBL                 | 10:54479518  | 10 | 54479518  | C | T | 0.93 | 0.50  | 0.11 | 1.9E-06 |
| MBL                 | 10:54495617  | 10 | 54495617  | G | T | 0.85 | 0.82  | 0.08 | 1.1E-25 |
| MBL                 | 10:54526206  | 10 | 54526206  | T | C | 0.59 | 0.85  | 0.04 | 9.8E-95 |
| MBL                 | 10:54526762  | 10 | 54526762  | T | C | 0.93 | -1.10 | 0.14 | 5.2E-15 |
| MBL                 | 10:54530636  | 10 | 54530636  | G | A | 0.56 | 0.54  | 0.05 | 3.3E-32 |
| MBL                 | 10:54531242  | 10 | 54531242  | G | A | 0.94 | -1.01 | 0.15 | 4.0E-11 |
| MBL                 | 10:54547088  | 10 | 54547088  | G | A | 0.74 | 0.51  | 0.05 | 6.1E-23 |

|            |              |    |           |   |   |      |       |      |         |
|------------|--------------|----|-----------|---|---|------|-------|------|---------|
| MBL        | 10:54563060  | 10 | 54563060  | G | T | 0.68 | -0.25 | 0.06 | 4.6E-06 |
| MBL        | 10:54601445  | 10 | 54601445  | A | T | 0.73 | -0.36 | 0.06 | 1.6E-08 |
| MBL        | 10:54645437  | 10 | 54645437  | T | G | 0.51 | -0.46 | 0.05 | 1.0E-21 |
| MBL        | 15:73331183  | 15 | 73331183  | G | T | 0.71 | -0.28 | 0.05 | 2.2E-07 |
| MBL        | 5:56279319   | 5  | 56279319  | C | T | 0.92 | 0.74  | 0.16 | 2.1E-06 |
| MBL        | 9:136146077  | 9  | 136146077 | T | G | 0.68 | -0.28 | 0.05 | 2.3E-07 |
| MCP_3      | 16:82644050  | 16 | 82644050  | G | A | 0.74 | -0.29 | 0.06 | 4.8E-06 |
| MCP_3      | 17:32505821  | 17 | 32505821  | G | A | 0.80 | -0.41 | 0.09 | 3.5E-06 |
| MCP_3      | 17:32559642  | 17 | 32559642  | T | C | 0.56 | 0.32  | 0.05 | 3.3E-10 |
| MCP_3      | 17:32634541  | 17 | 32634541  | A | G | 0.60 | -0.26 | 0.05 | 1.3E-06 |
| MCP_3      | 17:32647544  | 17 | 32647544  | A | G | 0.84 | 0.72  | 0.06 | 4.6E-30 |
| MCP_3      | 19:1580334   | 19 | 1580334   | T | C | 0.80 | 0.34  | 0.07 | 2.1E-06 |
| MCP_3      | 22:39568995  | 22 | 39568995  | C | T | 0.93 | 0.62  | 0.12 | 1.6E-07 |
| MCP_3      | 2:220156531  | 2  | 220156531 | A | G | 0.81 | -0.32 | 0.07 | 2.5E-06 |
| Mesothelin | 10:110634573 | 10 | 110634573 | C | T | 0.92 | -0.40 | 0.09 | 2.4E-05 |
| Mesothelin | 10:16519763  | 10 | 16519763  | A | G | 0.64 | 0.26  | 0.05 | 1.4E-06 |
| Mesothelin | 10:96823016  | 10 | 96823016  | G | A | 0.77 | -0.25 | 0.06 | 2.0E-05 |
| Mesothelin | 12:87747907  | 12 | 87747907  | C | A | 0.89 | -0.35 | 0.08 | 5.5E-06 |
| Mesothelin | 15:101930816 | 15 | 101930816 | A | G | 0.67 | -0.30 | 0.07 | 5.4E-06 |
| Mesothelin | 16:83825330  | 16 | 83825330  | C | A | 0.77 | 0.28  | 0.06 | 1.4E-05 |
| Mesothelin | 17:50294106  | 17 | 50294106  | T | C | 0.59 | 0.23  | 0.05 | 1.9E-05 |
| Mesothelin | 1:72233707   | 1  | 72233707  | A | G | 0.92 | -0.41 | 0.10 | 2.7E-05 |
| Mesothelin | 1:81266629   | 1  | 81266629  | G | A | 0.53 | 0.22  | 0.05 | 3.1E-05 |
| Mesothelin | 20:595205    | 20 | 595205    | A | G | 0.75 | -0.43 | 0.09 | 2.0E-06 |
| Mesothelin | 2:123189197  | 2  | 123189197 | G | A | 0.62 | 0.26  | 0.05 | 1.8E-06 |
| Mesothelin | 2:161842448  | 2  | 161842448 | C | T | 0.59 | 0.26  | 0.06 | 3.6E-05 |
| Mesothelin | 2:3062055    | 2  | 3062055   | G | A | 0.53 | 0.29  | 0.07 | 7.7E-06 |
| Mesothelin | 2:3714261    | 2  | 3714261   | A | C | 0.92 | -0.50 | 0.11 | 8.7E-06 |
| Mesothelin | 2:71459295   | 2  | 71459295  | T | A | 0.78 | -0.28 | 0.06 | 8.7E-06 |
| Mesothelin | 3:127062401  | 3  | 127062401 | G | A | 0.80 | -0.28 | 0.07 | 2.1E-05 |
| Mesothelin | 3:29604941   | 3  | 29604941  | T | G | 0.86 | 0.30  | 0.07 | 2.9E-05 |
| Mesothelin | 3:38733246   | 3  | 38733246  | A | G | 0.87 | 0.38  | 0.09 | 2.8E-05 |
| Mesothelin | 3:67536688   | 3  | 67536688  | A | G | 0.77 | 0.28  | 0.07 | 2.2E-05 |
| Mesothelin | 3:77744694   | 3  | 77744694  | C | A | 0.53 | -0.21 | 0.05 | 3.2E-05 |
| Mesothelin | 4:121057894  | 4  | 121057894 | G | A | 0.84 | 0.30  | 0.07 | 4.1E-05 |
| Mesothelin | 4:70950894   | 4  | 70950894  | T | G | 0.90 | 0.35  | 0.09 | 3.9E-05 |
| Mesothelin | 5:124856792  | 5  | 124856792 | T | G | 0.67 | 0.24  | 0.06 | 4.9E-05 |
| Mesothelin | 5:85351431   | 5  | 85351431  | A | G | 0.91 | 0.55  | 0.13 | 1.5E-05 |
| Mesothelin | 5:94935781   | 5  | 94935781  | T | A | 0.69 | 0.25  | 0.06 | 2.5E-05 |
| Mesothelin | 7:130891620  | 7  | 130891620 | A | G | 0.79 | 0.27  | 0.07 | 3.3E-05 |
| Mesothelin | 7:17549009   | 7  | 17549009  | A | C | 0.90 | 0.44  | 0.11 | 4.3E-05 |
| Mesothelin | 7:82183483   | 7  | 82183483  | A | C | 0.83 | -0.30 | 0.07 | 9.4E-06 |



|            |             |    |           |   |   |      |       |      |         |
|------------|-------------|----|-----------|---|---|------|-------|------|---------|
| Mesothelin | 8:13887649  | 8  | 13887649  | G | C | 0.71 | 0.29  | 0.07 | 2.5E-05 |
| Mesothelin | 9:21122071  | 9  | 21122071  | T | C | 0.47 | 0.23  | 0.05 | 1.7E-05 |
| Mesothelin | 9:33715801  | 9  | 33715801  | G | A | 0.94 | -0.54 | 0.13 | 4.9E-05 |
| Mesothelin | 9:7805650   | 9  | 7805650   | C | T | 0.78 | 0.27  | 0.06 | 1.6E-05 |
| Met        | 21:25328443 | 21 | 25328443  | A | G | 0.75 | 0.37  | 0.07 | 2.8E-07 |
| Met        | 9:136155000 | 9  | 136155000 | C | T | 0.82 | 0.38  | 0.07 | 3.0E-08 |
| MIA        | 19:41207206 | 19 | 41207206  | C | G | 0.93 | -0.78 | 0.11 | 5.2E-12 |
| MIA        | 19:41207342 | 19 | 41207342  | G | C | 0.91 | -0.65 | 0.10 | 1.1E-10 |
| MIA        | 19:41265201 | 19 | 41265201  | T | C | 0.66 | -0.50 | 0.05 | 7.8E-23 |
| MIA        | 19:41284915 | 19 | 41284915  | C | T | 0.93 | -1.39 | 0.09 | 5.2E-60 |
| MIA        | 19:41503447 | 19 | 41503447  | T | A | 0.75 | -0.33 | 0.06 | 1.3E-07 |
| MICA       | 5:139145084 | 5  | 139145084 | C | T | 0.94 | -0.58 | 0.11 | 3.1E-07 |
| MICA       | 6:28203056  | 6  | 28203056  | T | G | 0.92 | -0.52 | 0.09 | 1.5E-08 |
| MICA       | 6:29678520  | 6  | 29678520  | G | A | 0.72 | 0.29  | 0.06 | 2.4E-07 |
| MICA       | 6:29970960  | 6  | 29970960  | G | C | 0.90 | -0.56 | 0.09 | 2.0E-10 |
| MICA       | 6:31050348  | 6  | 31050348  | A | G | 0.73 | 0.68  | 0.05 | 3.1E-39 |
| MICA       | 6:31082188  | 6  | 31082188  | G | A | 0.66 | -0.32 | 0.06 | 2.5E-08 |
| MICA       | 6:31091475  | 6  | 31091475  | C | T | 0.59 | 0.38  | 0.05 | 3.7E-13 |
| MICA       | 6:31105265  | 6  | 31105265  | G | A | 0.49 | -0.51 | 0.05 | 1.1E-24 |
| MICA       | 6:31140615  | 6  | 31140615  | C | T | 0.91 | 0.52  | 0.09 | 3.9E-09 |
| MICA       | 6:31151413  | 6  | 31151413  | A | C | 0.81 | 0.49  | 0.07 | 3.4E-13 |
| MICA       | 6:31172225  | 6  | 31172225  | G | A | 0.80 | 0.46  | 0.07 | 3.9E-12 |
| MICA       | 6:31199164  | 6  | 31199164  | C | T | 0.87 | 0.41  | 0.07 | 1.1E-08 |
| MICA       | 6:31228410  | 6  | 31228410  | C | T | 0.63 | -0.69 | 0.06 | 7.3E-33 |
| MICA       | 6:31319815  | 6  | 31319815  | G | A | 0.82 | 0.91  | 0.08 | 2.6E-28 |
| MICA       | 6:31322522  | 6  | 31322522  | C | A | 0.86 | 0.92  | 0.12 | 1.3E-13 |
| MICA       | 6:31323468  | 6  | 31323468  | G | T | 0.81 | 0.96  | 0.10 | 7.7E-22 |
| MICA       | 6:31326166  | 6  | 31326166  | T | C | 0.58 | -0.90 | 0.06 | 3.2E-59 |
| MICA       | 6:31328636  | 6  | 31328636  | C | T | 0.92 | 1.57  | 0.13 | 2.3E-31 |
| MICA       | 6:31334852  | 6  | 31334852  | G | T | 0.75 | 0.83  | 0.05 | 6.1E-59 |
| MICA       | 6:31335330  | 6  | 31335330  | G | C | 0.71 | -0.54 | 0.05 | 3.8E-24 |
| MICA       | 6:31367077  | 6  | 31367077  | G | A | 0.78 | -0.85 | 0.08 | 2.9E-24 |
| MICA       | 6:31367874  | 6  | 31367874  | T | C | 0.94 | 2.02  | 0.18 | 6.6E-30 |
| MICA       | 6:31406562  | 6  | 31406562  | G | A | 0.94 | 0.89  | 0.11 | 3.0E-17 |
| MICA       | 6:31409283  | 6  | 31409283  | G | A | 0.90 | 0.77  | 0.09 | 6.9E-18 |
| MICA       | 6:31411213  | 6  | 31411213  | T | A | 0.88 | -0.86 | 0.08 | 1.4E-26 |
| MICA       | 6:31449022  | 6  | 31449022  | C | T | 0.72 | -0.42 | 0.05 | 5.7E-15 |
| MICA       | 6:31449213  | 6  | 31449213  | A | T | 0.93 | 0.52  | 0.10 | 1.9E-07 |
| MICA       | 6:31456769  | 6  | 31456769  | G | A | 0.65 | 0.38  | 0.06 | 1.1E-10 |
| MICA       | 6:31458752  | 6  | 31458752  | G | A | 0.92 | 0.72  | 0.11 | 3.8E-11 |
| MICA       | 6:31461667  | 6  | 31461667  | T | C | 0.79 | 0.47  | 0.07 | 2.3E-12 |
| MICA       | 6:31485101  | 6  | 31485101  | A | C | 0.76 | -0.33 | 0.06 | 1.3E-07 |

|        |              |    |           |   |   |      |       |      |         |
|--------|--------------|----|-----------|---|---|------|-------|------|---------|
| MICA   | 6:31494202   | 6  | 31494202  | A | G | 0.87 | 0.42  | 0.08 | 8.9E-08 |
| MICA   | 6:31496467   | 6  | 31496467  | C | A | 0.89 | 0.55  | 0.09 | 3.5E-10 |
| MICA   | 6:31540556   | 6  | 31540556  | T | C | 0.74 | 0.48  | 0.06 | 1.4E-16 |
| MICA   | 6:31749804   | 6  | 31749804  | C | T | 0.83 | 0.59  | 0.07 | 1.8E-18 |
| MICA   | 6:32055486   | 6  | 32055486  | G | A | 0.95 | -0.80 | 0.13 | 3.2E-10 |
| MICA   | 6:32189921   | 6  | 32189921  | A | G | 0.87 | -0.58 | 0.07 | 8.3E-15 |
| MICB   | 6:28301195   | 6  | 28301195  | A | G | 0.91 | 0.42  | 0.09 | 1.7E-06 |
| MICB   | 6:29986324   | 6  | 29986324  | T | A | 0.91 | 0.49  | 0.09 | 1.5E-08 |
| MICB   | 6:31052632   | 6  | 31052632  | G | T | 0.91 | -0.48 | 0.09 | 2.3E-07 |
| MICB   | 6:31091992   | 6  | 31091992  | G | A | 0.53 | 0.33  | 0.05 | 8.1E-11 |
| MICB   | 6:31325745   | 6  | 31325745  | C | T | 0.59 | 0.42  | 0.08 | 4.8E-08 |
| MICB   | 6:31328245   | 6  | 31328245  | A | G | 0.70 | -0.42 | 0.06 | 2.1E-12 |
| MICB   | 6:31461771   | 6  | 31461771  | T | A | 0.60 | 0.42  | 0.05 | 2.3E-14 |
| MICB   | 6:31464026   | 6  | 31464026  | T | C | 0.83 | -0.68 | 0.07 | 3.7E-21 |
| MICB   | 6:31469591   | 6  | 31469591  | G | A | 0.52 | -0.50 | 0.05 | 1.5E-21 |
| MICB   | 6:31486307   | 6  | 31486307  | C | T | 0.92 | -0.84 | 0.09 | 3.8E-21 |
| MICB   | 6:31505480   | 6  | 31505480  | A | G | 0.89 | 0.77  | 0.08 | 2.2E-23 |
| MICB   | 6:31698088   | 6  | 31698088  | T | G | 0.65 | 0.27  | 0.05 | 7.0E-07 |
| MICB   | 6:31885930   | 6  | 31885930  | T | C | 0.67 | 0.32  | 0.05 | 7.4E-10 |
| MICB   | 6:32807490   | 6  | 32807490  | C | T | 0.91 | 0.55  | 0.09 | 1.8E-09 |
| MICB   | 7:29017188   | 7  | 29017188  | A | C | 0.69 | -0.25 | 0.05 | 4.4E-06 |
| MIF    | 13:46534080  | 13 | 46534080  | A | C | 0.66 | -0.48 | 0.05 | 1.5E-19 |
| MIF    | 13:46673317  | 13 | 46673317  | G | A | 0.55 | 0.44  | 0.06 | 4.5E-12 |
| MIP_1a | 17:34389361  | 17 | 34389361  | A | G | 0.87 | -0.61 | 0.07 | 6.4E-17 |
| MIP_3b | 3:49710479   | 3  | 49710479  | A | T | 0.78 | 0.38  | 0.07 | 1.6E-07 |
| MIP_5  | 17:34306470  | 17 | 34306470  | G | C | 0.95 | -0.78 | 0.13 | 3.9E-09 |
| MIP_5  | 17:34312215  | 17 | 34312215  | T | C | 0.89 | -0.80 | 0.10 | 1.2E-16 |
| MIP_5  | 17:34338835  | 17 | 34338835  | A | T | 0.93 | -1.67 | 0.09 | 3.8E-83 |
| MIS    | 10:116632130 | 10 | 116632130 | A | T | 0.64 | -0.26 | 0.05 | 9.4E-07 |
| MIS    | 11:6459838   | 11 | 6459838   | C | T | 0.79 | -0.30 | 0.06 | 6.4E-07 |
| MIS    | 1:101643168  | 1  | 101643168 | A | G | 0.81 | -0.34 | 0.07 | 4.7E-06 |
| MIS    | 3:134074730  | 3  | 134074730 | T | A | 0.89 | 0.47  | 0.10 | 3.8E-06 |
| MMP_1  | 11:102679658 | 11 | 102679658 | T | C | 0.51 | -0.38 | 0.05 | 6.5E-14 |
| MMP_12 | 11:102745791 | 11 | 102745791 | T | C | 0.87 | 0.68  | 0.06 | 1.4E-25 |
| MMP_12 | 11:102835591 | 11 | 102835591 | T | C | 0.61 | 0.31  | 0.05 | 2.1E-09 |
| MMP_7  | 11:102376169 | 11 | 102376169 | G | A | 0.55 | 0.34  | 0.06 | 4.5E-08 |
| MMP_7  | 11:102396607 | 11 | 102396607 | T | C | 0.54 | 0.32  | 0.05 | 3.1E-10 |
| MMP_7  | 11:102429620 | 11 | 102429620 | T | C | 0.77 | 0.33  | 0.06 | 6.6E-09 |
| MMP_7  | 11:102436210 | 11 | 102436210 | G | A | 0.76 | -0.31 | 0.06 | 1.6E-07 |
| MMP_7  | 11:102465956 | 11 | 102465956 | C | T | 0.88 | -0.43 | 0.08 | 5.6E-08 |
| MMP_8  | 15:98802455  | 15 | 98802455  | G | A | 0.85 | -0.34 | 0.06 | 1.2E-07 |
| MMP_8  | 2:105253184  | 2  | 105253184 | G | A | 0.51 | -0.32 | 0.06 | 5.7E-07 |

|                 |              |    |           |   |   |      |       |      |          |
|-----------------|--------------|----|-----------|---|---|------|-------|------|----------|
| MMP_8           | 2:17118296   | 2  | 17118296  | G | A | 0.88 | -0.38 | 0.08 | 1.7E-06  |
| MMP_8           | 2:42735736   | 2  | 42735736  | G | C | 0.80 | -0.35 | 0.07 | 1.8E-06  |
| MMP_8           | 5:8558468    | 5  | 8558468   | G | T | 0.76 | 0.31  | 0.07 | 4.6E-06  |
| MMP_8           | 6:31104702   | 6  | 31104702  | C | G | 0.70 | -0.29 | 0.06 | 4.5E-07  |
| MMP_8           | 6:31271216   | 6  | 31271216  | G | T | 0.79 | -0.37 | 0.08 | 2.5E-06  |
| MMP_8           | 6:31318432   | 6  | 31318432  | T | C | 0.89 | 0.67  | 0.14 | 2.2E-06  |
| MMP_8           | 6:31318476   | 6  | 31318476  | G | A | 0.87 | 0.58  | 0.12 | 1.0E-06  |
| MMP_8           | 6:31325430   | 6  | 31325430  | A | G | 0.52 | 0.35  | 0.08 | 3.1E-06  |
| MMP_8           | 6:31341941   | 6  | 31341941  | G | A | 0.71 | 0.38  | 0.07 | 7.6E-08  |
| MMP_8           | 6:31427594   | 6  | 31427594  | C | T | 0.93 | -0.57 | 0.11 | 6.2E-07  |
| MMP_8           | 6:31515140   | 6  | 31515140  | A | G | 0.93 | -0.70 | 0.10 | 2.3E-12  |
| MMP_8           | 6:31811850   | 6  | 31811850  | T | C | 0.61 | -0.28 | 0.05 | 4.5E-08  |
| MMP_8           | 6:31836202   | 6  | 31836202  | A | C | 0.92 | -0.62 | 0.09 | 1.7E-12  |
| MMP_8           | 6:31872383   | 6  | 31872383  | G | A | 0.92 | -0.77 | 0.09 | 1.6E-16  |
| MMP_8           | 6:31907837   | 6  | 31907837  | A | G | 0.49 | 0.32  | 0.05 | 4.4E-11  |
| MMP_8           | 6:31914179   | 6  | 31914179  | C | T | 0.91 | -1.46 | 0.07 | 5.7E-97  |
| MMP_8           | 6:32025326   | 6  | 32025326  | C | T | 0.91 | -0.66 | 0.08 | 4.9E-16  |
| MMP_8           | 6:32105209   | 6  | 32105209  | G | T | 0.91 | -0.44 | 0.09 | 5.5E-07  |
| MO2R1           | 3:112634262  | 3  | 112634262 | G | A | 0.58 | -0.32 | 0.05 | 7.7E-10  |
| MP2K2           | 13:113851874 | 13 | 113851874 | T | C | 0.79 | 0.47  | 0.06 | 5.4E-13  |
| MP2K4           | 1:230297778  | 1  | 230297778 | T | A | 0.59 | -0.35 | 0.05 | 2.4E-11  |
| MP2K4           | 3:186359810  | 3  | 186359810 | T | G | 0.68 | -0.50 | 0.06 | 1.1E-16  |
| MP2K4           | 3:186381717  | 3  | 186381717 | G | A | 0.73 | 0.77  | 0.06 | 8.2E-44  |
| MP2K4           | 3:186394038  | 3  | 186394038 | G | C | 0.80 | -1.04 | 0.06 | 6.7E-68  |
| MP2K4           | 3:186433574  | 3  | 186433574 | A | T | 0.69 | -0.32 | 0.06 | 1.6E-08  |
| MPIF_1          | 17:34321277  | 17 | 34321277  | C | T | 0.89 | -1.00 | 0.10 | 1.3E-25  |
| MSP             | 3:47687940   | 3  | 47687940  | G | A | 0.93 | 1.07  | 0.17 | 2.4E-10  |
| MSP             | 3:48268509   | 3  | 48268509  | T | G | 0.77 | -0.43 | 0.07 | 1.9E-09  |
| MSP             | 3:48541016   | 3  | 48541016  | A | C | 0.94 | 0.70  | 0.11 | 2.2E-10  |
| MSP             | 3:48695834   | 3  | 48695834  | T | C | 0.88 | 0.75  | 0.08 | 4.2E-20  |
| MSP             | 3:48720303   | 3  | 48720303  | G | A | 0.90 | 0.85  | 0.08 | 3.7E-26  |
| MSP             | 3:49381911   | 3  | 49381911  | T | G | 0.71 | -0.47 | 0.06 | 2.6E-15  |
| MSP             | 3:49637049   | 3  | 49637049  | C | G | 0.93 | -1.22 | 0.17 | 1.9E-13  |
| MSP             | 3:49669948   | 3  | 49669948  | G | A | 0.76 | -0.79 | 0.07 | 5.7E-32  |
| MSP             | 3:49706699   | 3  | 49706699  | A | G | 0.93 | 2.35  | 0.13 | 2.0E-75  |
| MSP             | 3:49708769   | 3  | 49708769  | T | C | 0.80 | -0.71 | 0.07 | 6.9E-24  |
| MSP             | 3:49721532   | 3  | 49721532  | G | A | 0.71 | 1.25  | 0.04 | 1.1E-269 |
| MSP             | 3:49726178   | 3  | 49726178  | G | A | 0.94 | 1.82  | 0.16 | 1.7E-30  |
| MSP             | 3:50174184   | 3  | 50174184  | T | C | 0.50 | -0.52 | 0.05 | 3.8E-26  |
| MSP             | 3:50217558   | 3  | 50217558  | C | T | 0.90 | 1.11  | 0.10 | 1.8E-27  |
| MSP             | 3:50478487   | 3  | 50478487  | G | T | 0.59 | 0.40  | 0.06 | 1.7E-10  |
| Myeloperoxidase | 17:56484131  | 17 | 56484131  | T | A | 0.71 | -0.32 | 0.07 | 8.9E-07  |

|                 |              |    |           |   |   |      |       |      |          |
|-----------------|--------------|----|-----------|---|---|------|-------|------|----------|
| Myeloperoxidase | 3:85031153   | 3  | 85031153  | C | T | 0.90 | 0.37  | 0.08 | 4.3E-06  |
| Myeloperoxidase | 4:140850990  | 4  | 140850990 | C | T | 0.64 | 0.24  | 0.05 | 1.9E-06  |
| Myeloperoxidase | 7:149445992  | 7  | 149445992 | A | G | 0.87 | -0.46 | 0.10 | 3.4E-06  |
| Myeloperoxidase | 8:120626105  | 8  | 120626105 | A | G | 0.90 | 0.44  | 0.09 | 1.6E-06  |
| NAGK            | 2:71292522   | 2  | 71292522  | T | C | 0.66 | 0.48  | 0.05 | 2.1E-19  |
| NAGK            | 2:71358709   | 2  | 71358709  | A | G | 0.90 | 0.54  | 0.10 | 3.6E-08  |
| NCAM_120        | 11:112639406 | 11 | 112639406 | C | T | 0.52 | 0.26  | 0.05 | 1.1E-07  |
| Nidogen         | 10:20167649  | 10 | 20167649  | A | G | 0.71 | -0.27 | 0.05 | 8.1E-08  |
| Nidogen         | 10:20235463  | 10 | 20235463  | G | C | 0.70 | 0.34  | 0.05 | 1.0E-11  |
| Nidogen         | 18:1757031   | 18 | 1757031   | C | T | 0.64 | -0.28 | 0.06 | 4.6E-06  |
| Nidogen         | 2:873119     | 2  | 873119    | A | G | 0.48 | -0.23 | 0.05 | 7.7E-07  |
| NKG2D           | 12:10532833  | 12 | 10532833  | T | G | 0.79 | -0.43 | 0.07 | 2.9E-10  |
| NKp30           | 6:31397654   | 6  | 31397654  | A | G | 0.93 | 0.76  | 0.13 | 4.4E-09  |
| NKp30           | 6:31543827   | 6  | 31543827  | G | A | 0.90 | 0.61  | 0.09 | 1.6E-12  |
| Notch_1         | 19:34403671  | 19 | 34403671  | A | G | 0.73 | 0.32  | 0.07 | 5.9E-07  |
| Notch_1         | 1:234955964  | 1  | 234955964 | C | A | 0.88 | -0.48 | 0.10 | 1.9E-06  |
| Notch_1         | 9:136149150  | 9  | 136149150 | C | T | 0.92 | -0.51 | 0.10 | 3.8E-07  |
| NPS_PLA2        | 1:20273680   | 1  | 20273680  | C | G | 0.67 | 0.26  | 0.05 | 3.7E-07  |
| NPS_PLA2        | 1:20292378   | 1  | 20292378  | T | C | 0.73 | 0.38  | 0.05 | 1.8E-14  |
| NPS_PLA2        | 1:20297111   | 1  | 20297111  | C | T | 0.76 | -0.70 | 0.06 | 6.0E-35  |
| NPS_PLA2        | 1:20361508   | 1  | 20361508  | G | A | 0.66 | -0.47 | 0.05 | 6.8E-18  |
| NRP1            | 10:33480713  | 10 | 33480713  | C | T | 0.64 | 0.29  | 0.05 | 4.2E-08  |
| NRP1            | 1:230297778  | 1  | 230297778 | T | A | 0.59 | 0.30  | 0.05 | 1.5E-08  |
| NXPH1           | 1:57377172   | 1  | 57377172  | T | C | 0.71 | -0.35 | 0.05 | 1.5E-10  |
| NXPH1           | 1:57412848   | 1  | 57412848  | G | T | 0.70 | -0.33 | 0.06 | 3.6E-08  |
| OCAD1           | 12:13858102  | 12 | 13858102  | T | A | 0.55 | 0.26  | 0.05 | 2.9E-07  |
| OX2G            | 9:136151806  | 9  | 136151806 | T | C | 0.79 | 0.34  | 0.07 | 2.9E-07  |
| PARC            | 17:34389914  | 17 | 34389914  | A | G | 0.87 | -0.86 | 0.07 | 1.9E-35  |
| PARC            | 8:79908796   | 8  | 79908796  | G | A | 0.58 | -0.31 | 0.05 | 6.7E-09  |
| PCSK7           | 11:117015238 | 11 | 117015238 | C | A | 0.92 | 0.66  | 0.10 | 4.4E-11  |
| PCSK7           | 11:117072525 | 11 | 117072525 | C | T | 0.77 | 0.61  | 0.06 | 1.1E-26  |
| PCSK7           | 11:117094491 | 11 | 117094491 | C | T | 0.84 | -0.52 | 0.11 | 2.9E-06  |
| PCSK7           | 11:124948066 | 11 | 124948066 | G | A | 0.69 | 0.33  | 0.06 | 2.4E-07  |
| PCSK7           | 15:51807464  | 15 | 51807464  | C | A | 0.85 | -0.39 | 0.08 | 1.7E-06  |
| PCSK7           | 3:7660133    | 3  | 7660133   | C | T | 0.63 | 0.26  | 0.05 | 1.7E-06  |
| PDE3A           | 9:112893735  | 9  | 112893735 | C | T | 0.74 | 0.29  | 0.06 | 2.4E-07  |
| PDGF_Rb         | 5:149479852  | 5  | 149479852 | C | A | 0.70 | 0.78  | 0.07 | 1.1E-25  |
| PDGF_Rb         | 5:149501751  | 5  | 149501751 | A | C | 0.54 | 0.61  | 0.05 | 3.0E-35  |
| PDGF_Rb         | 5:149505327  | 5  | 149505327 | A | G | 0.91 | 0.70  | 0.10 | 1.4E-11  |
| PDGF_Rb         | 5:149515074  | 5  | 149515074 | A | G | 0.52 | 1.16  | 0.03 | 3.0e-316 |
| PDGF_Rb         | 5:149521791  | 5  | 149521791 | A | G | 0.89 | 0.98  | 0.08 | 4.3E-34  |
| PDGF_Rb         | 5:149544045  | 5  | 149544045 | G | A | 0.53 | 0.41  | 0.05 | 1.3E-14  |

|               |              |    |           |   |   |      |       |      |          |
|---------------|--------------|----|-----------|---|---|------|-------|------|----------|
| PD_L2         | 9:5472379    | 9  | 5472379   | T | C | 0.78 | -0.42 | 0.06 | 4.6E-11  |
| PD_L2         | 9:5509678    | 9  | 5509678   | G | A | 0.77 | -0.71 | 0.06 | 1.5E-32  |
| PD_L2         | 9:5512459    | 9  | 5512459   | T | C | 0.87 | -0.70 | 0.09 | 4.0E-15  |
| PD_L2         | 9:5512522    | 9  | 5512522   | T | G | 0.74 | -0.39 | 0.06 | 3.3E-10  |
| PGRP_S        | 19:46538325  | 19 | 46538325  | C | T | 0.73 | 0.35  | 0.06 | 2.1E-08  |
| PIGR          | 1:207143422  | 1  | 207143422 | A | G | 0.54 | 0.32  | 0.05 | 2.6E-10  |
| Plasminogen   | 6:161092438  | 6  | 161092438 | C | T | 0.91 | 0.65  | 0.11 | 1.4E-09  |
| Plasminogen   | 6:161252770  | 6  | 161252770 | G | A | 0.92 | 0.56  | 0.10 | 1.1E-08  |
| PLXC1         | 12:94621615  | 12 | 94621615  | T | A | 0.57 | 0.52  | 0.05 | 6.5E-26  |
| PLXC1         | 12:94640095  | 12 | 94640095  | C | T | 0.59 | 0.43  | 0.07 | 1.4E-09  |
| PPAC          | 2:183722     | 2  | 183722    | C | G | 0.67 | 0.39  | 0.06 | 4.2E-12  |
| PPAC          | 2:199502     | 2  | 199502    | T | G | 0.70 | 0.48  | 0.06 | 3.6E-17  |
| PPAC          | 2:271797     | 2  | 271797    | G | A | 0.68 | -1.00 | 0.04 | 8.8E-129 |
| PPID          | 4:159622910  | 4  | 159622910 | A | T | 0.74 | -0.45 | 0.06 | 4.2E-15  |
| PPIE          | 1:40219065   | 1  | 40219065  | C | T | 0.64 | 0.42  | 0.05 | 7.2E-16  |
| Prekallikrein | 3:186439173  | 3  | 186439173 | T | C | 0.71 | 0.28  | 0.05 | 1.1E-07  |
| Prekallikrein | 3:186454180  | 3  | 186454180 | A | C | 0.61 | -0.48 | 0.05 | 3.2E-25  |
| Prekallikrein | 4:187173691  | 4  | 187173691 | A | G | 0.60 | -0.40 | 0.05 | 2.7E-16  |
| Protein_C     | 20:32456567  | 20 | 32456567  | C | T | 0.94 | -0.58 | 0.11 | 1.2E-07  |
| Protein_C     | 20:33677621  | 20 | 33677621  | C | T | 0.64 | -0.30 | 0.06 | 1.0E-07  |
| Protein_C     | 20:33703134  | 20 | 33703134  | G | A | 0.91 | -0.99 | 0.09 | 1.1E-28  |
| Protein_C     | 6:107868962  | 6  | 107868962 | C | T | 0.82 | 0.36  | 0.07 | 1.6E-07  |
| PSA           | 10:26252005  | 10 | 26252005  | A | G | 0.89 | -0.28 | 0.07 | 3.1E-05  |
| PSA           | 10:70844482  | 10 | 70844482  | T | G | 0.63 | 0.19  | 0.04 | 5.9E-06  |
| PSA           | 11:128492549 | 11 | 128492549 | G | T | 0.78 | 0.26  | 0.06 | 5.0E-05  |
| PSA           | 11:82397014  | 11 | 82397014  | C | T | 0.88 | -0.28 | 0.07 | 4.8E-05  |
| PSA           | 13:51482712  | 13 | 51482712  | C | T | 0.68 | -0.23 | 0.05 | 6.0E-07  |
| PSA           | 15:69073361  | 15 | 69073361  | T | G | 0.93 | 0.44  | 0.11 | 3.8E-05  |
| PSA           | 16:64270496  | 16 | 64270496  | C | T | 0.93 | -0.44 | 0.09 | 2.6E-06  |
| PSA           | 16:75246644  | 16 | 75246644  | C | T | 0.78 | 0.24  | 0.06 | 1.2E-05  |
| PSA           | 17:3161297   | 17 | 3161297   | G | A | 0.67 | 0.24  | 0.06 | 1.9E-05  |
| PSA           | 1:200294113  | 1  | 200294113 | T | C | 0.71 | 0.19  | 0.05 | 3.2E-05  |
| PSA           | 1:200852820  | 1  | 200852820 | A | G | 0.60 | -0.20 | 0.04 | 4.8E-06  |
| PSA           | 1:28417367   | 1  | 28417367  | T | C | 0.91 | 0.37  | 0.08 | 1.7E-05  |
| PSA           | 22:30893946  | 22 | 30893946  | G | A | 0.95 | -0.43 | 0.10 | 4.6E-05  |
| PSA           | 2:106208235  | 2  | 106208235 | T | C | 0.90 | 0.30  | 0.07 | 3.7E-05  |
| PSA           | 2:108643385  | 2  | 108643385 | A | G | 0.86 | -0.25 | 0.06 | 3.2E-05  |
| PSA           | 2:157534037  | 2  | 157534037 | C | A | 0.72 | -0.24 | 0.05 | 5.3E-06  |
| PSA           | 2:201561017  | 2  | 201561017 | G | A | 0.83 | -0.33 | 0.08 | 2.4E-05  |
| PSA           | 2:20381830   | 2  | 20381830  | T | C | 0.66 | 0.20  | 0.05 | 1.9E-05  |
| PSA           | 2:225906555  | 2  | 225906555 | G | A | 0.72 | -0.23 | 0.05 | 1.9E-06  |
| PSA           | 2:65659488   | 2  | 65659488  | A | G | 0.57 | 0.17  | 0.04 | 4.7E-05  |

|            |              |    |           |   |   |      |       |      |         |
|------------|--------------|----|-----------|---|---|------|-------|------|---------|
| PSA        | 3:189585208  | 3  | 189585208 | G | A | 0.64 | -0.19 | 0.04 | 8.2E-06 |
| PSA        | 4:127572943  | 4  | 127572943 | T | G | 0.50 | -0.18 | 0.04 | 7.8E-06 |
| PSA        | 4:128471085  | 4  | 128471085 | T | G | 0.58 | -0.22 | 0.05 | 3.0E-05 |
| PSA        | 4:130103121  | 4  | 130103121 | C | T | 0.95 | 0.52  | 0.13 | 3.3E-05 |
| PSA        | 4:39244477   | 4  | 39244477  | A | G | 0.89 | -0.28 | 0.07 | 3.1E-05 |
| PSA        | 4:80049576   | 4  | 80049576  | A | G | 0.83 | -0.32 | 0.07 | 6.1E-06 |
| PSA        | 5:158756968  | 5  | 158756968 | A | G | 0.79 | 0.25  | 0.05 | 5.4E-06 |
| PSA        | 5:26135884   | 5  | 26135884  | G | T | 0.88 | -0.42 | 0.09 | 6.8E-06 |
| PSA        | 6:113969387  | 6  | 113969387 | T | C | 0.64 | -0.20 | 0.05 | 2.3E-05 |
| PSA        | 7:14390962   | 7  | 14390962  | T | C | 0.76 | -0.28 | 0.06 | 4.4E-06 |
| P_Selectin | 10:127211308 | 10 | 127211308 | T | G | 0.77 | -0.32 | 0.06 | 1.0E-07 |
| P_Selectin | 1:169527101  | 1  | 169527101 | T | C | 0.90 | 0.65  | 0.08 | 3.7E-15 |
| P_Selectin | 1:169568698  | 1  | 169568698 | T | G | 0.54 | 0.26  | 0.05 | 5.5E-08 |
| P_Selectin | 9:136131905  | 9  | 136131905 | T | C | 0.65 | -0.27 | 0.05 | 4.2E-07 |
| P_Selectin | 9:136141870  | 9  | 136141870 | C | T | 0.82 | 0.73  | 0.06 | 2.9E-30 |
| P_Selectin | 9:136148000  | 9  | 136148000 | G | A | 0.59 | -0.42 | 0.06 | 6.4E-13 |
| RAP        | 6:31035012   | 6  | 31035012  | C | T | 0.85 | -0.48 | 0.08 | 2.2E-10 |
| RAP        | 6:31077239   | 6  | 31077239  | C | T | 0.90 | -0.60 | 0.08 | 1.6E-13 |
| RAP        | 6:31095294   | 6  | 31095294  | A | G | 0.47 | -0.29 | 0.05 | 5.6E-09 |
| RAP        | 6:31231454   | 6  | 31231454  | A | G | 0.64 | 0.34  | 0.07 | 4.5E-07 |
| RAP        | 6:31271700   | 6  | 31271700  | C | T | 0.59 | 0.33  | 0.06 | 9.8E-08 |
| RAP        | 6:31274647   | 6  | 31274647  | G | A | 0.89 | -0.88 | 0.08 | 5.0E-27 |
| RAP        | 6:31315085   | 6  | 31315085  | A | G | 0.77 | 0.64  | 0.11 | 4.9E-09 |
| RAP        | 6:31315706   | 6  | 31315706  | G | A | 0.88 | -0.90 | 0.13 | 1.9E-12 |
| RAP        | 6:31328636   | 6  | 31328636  | C | T | 0.92 | -1.37 | 0.13 | 2.0E-24 |
| RAP        | 6:31330844   | 6  | 31330844  | T | C | 0.57 | -0.27 | 0.05 | 2.3E-07 |
| RAP        | 6:31354939   | 6  | 31354939  | A | T | 0.94 | -0.81 | 0.14 | 6.0E-09 |
| RAP        | 6:31399945   | 6  | 31399945  | T | C | 0.93 | -1.04 | 0.11 | 2.1E-20 |
| RAP        | 6:31432006   | 6  | 31432006  | G | A | 0.91 | -0.84 | 0.09 | 3.2E-21 |
| RAP        | 6:31449213   | 6  | 31449213  | A | T | 0.93 | -0.91 | 0.09 | 7.9E-22 |
| RAP        | 6:31476297   | 6  | 31476297  | C | A | 0.83 | -0.50 | 0.07 | 2.0E-13 |
| RAP        | 6:31557226   | 6  | 31557226  | G | A | 0.87 | -0.49 | 0.08 | 1.2E-10 |
| RAP        | 6:31746548   | 6  | 31746548  | T | C | 0.92 | -0.65 | 0.09 | 5.6E-12 |
| RAP        | 6:31769479   | 6  | 31769479  | G | A | 0.92 | -0.58 | 0.09 | 3.3E-10 |
| RAP        | 6:31931137   | 6  | 31931137  | T | C | 0.80 | -0.35 | 0.06 | 2.5E-08 |
| RAP        | 6:32852647   | 6  | 32852647  | T | C | 0.90 | -0.44 | 0.08 | 3.6E-08 |
| RELT       | 11:73159312  | 11 | 73159312  | T | C | 0.80 | -0.32 | 0.06 | 5.7E-08 |
| RELT       | 13:110083898 | 13 | 110083898 | A | G | 0.90 | -0.35 | 0.08 | 3.2E-06 |
| RELT       | 1:77323124   | 1  | 77323124  | C | T | 0.79 | -0.27 | 0.06 | 2.9E-06 |
| RELT       | 6:167136154  | 6  | 167136154 | G | A | 0.80 | 0.32  | 0.07 | 4.8E-06 |
| RELT       | 6:94206433   | 6  | 94206433  | C | G | 0.91 | -0.37 | 0.08 | 4.2E-06 |
| RET        | 10:43384889  | 10 | 43384889  | T | C | 0.79 | 0.36  | 0.06 | 8.6E-09 |

|               |             |    |           |   |   |      |       |      |          |
|---------------|-------------|----|-----------|---|---|------|-------|------|----------|
| RET           | 10:43605902 | 10 | 43605902  | G | A | 0.76 | 0.34  | 0.06 | 1.8E-09  |
| RGM_C         | 7:57408960  | 7  | 57408960  | C | T | 0.70 | -0.34 | 0.06 | 3.2E-09  |
| RGM_C         | 9:35739876  | 9  | 35739876  | G | A | 0.56 | 0.30  | 0.06 | 5.9E-08  |
| RGM_C         | 9:35829390  | 9  | 35829390  | T | C | 0.63 | -0.35 | 0.05 | 1.6E-11  |
| ROR1          | 1:64614011  | 1  | 64614011  | T | C | 0.83 | 0.42  | 0.06 | 3.6E-11  |
| ROR1          | 1:64625169  | 1  | 64625169  | G | A | 0.71 | 0.36  | 0.06 | 1.1E-10  |
| SAA           | 11:18281786 | 11 | 18281786  | A | G | 0.78 | 0.67  | 0.07 | 7.3E-22  |
| SAA           | 11:18286402 | 11 | 18286402  | A | C | 0.74 | 0.86  | 0.08 | 4.6E-25  |
| SAA           | 11:18287034 | 11 | 18287034  | C | G | 0.67 | -0.90 | 0.04 | 1.8E-89  |
| SAA           | 11:18287809 | 11 | 18287809  | G | A | 0.90 | -0.56 | 0.09 | 1.6E-09  |
| SAA           | 11:18370969 | 11 | 18370969  | T | C | 0.56 | -0.70 | 0.05 | 8.6E-54  |
| SAA           | 11:18446663 | 11 | 18446663  | C | T | 0.86 | -0.46 | 0.07 | 1.7E-10  |
| Semaphorin_3A | 17:26472623 | 17 | 26472623  | C | G | 0.95 | -1.14 | 0.17 | 1.7E-11  |
| Semaphorin_3A | 17:26557777 | 17 | 26557777  | G | C | 0.76 | -0.58 | 0.06 | 1.9E-19  |
| Semaphorin_3A | 17:26558329 | 17 | 26558329  | G | T | 0.78 | 0.46  | 0.06 | 1.3E-13  |
| Semaphorin_3A | 17:26578159 | 17 | 26578159  | T | C | 0.92 | 0.70  | 0.10 | 1.4E-11  |
| Semaphorin_3A | 17:26694861 | 17 | 26694861  | G | A | 0.49 | -1.04 | 0.04 | 1.8E-125 |
| Semaphorin_3A | 17:26700470 | 17 | 26700470  | G | A | 0.92 | -1.32 | 0.15 | 6.4E-18  |
| Semaphorin_3A | 17:26710347 | 17 | 26710347  | C | T | 0.91 | 0.87  | 0.12 | 9.3E-14  |
| Semaphorin_3A | 17:26719788 | 17 | 26719788  | G | A | 0.83 | 0.71  | 0.07 | 7.0E-22  |
| Semaphorin_3A | 17:26742060 | 17 | 26742060  | G | A | 0.72 | -1.14 | 0.08 | 7.8E-42  |
| Semaphorin_3A | 17:26757423 | 17 | 26757423  | G | A | 0.56 | 0.67  | 0.06 | 2.4E-29  |
| Semaphorin_3A | 3:52261031  | 3  | 52261031  | A | G | 0.61 | 0.31  | 0.05 | 9.8E-09  |
| Semaphorin_3E | 7:82919330  | 7  | 82919330  | G | A | 0.68 | 0.34  | 0.06 | 1.6E-09  |
| Semaphorin_3E | 7:82932914  | 7  | 82932914  | A | T | 0.59 | 0.31  | 0.05 | 5.3E-09  |
| Semaphorin_3E | 7:82990977  | 7  | 82990977  | T | C | 0.86 | 0.53  | 0.07 | 2.0E-13  |
| Semaphorin_3E | 7:83039780  | 7  | 83039780  | T | A | 0.87 | 0.92  | 0.07 | 8.4E-40  |
| Semaphorin_3E | 7:83091534  | 7  | 83091534  | A | G | 0.59 | 0.40  | 0.05 | 1.4E-16  |
| Semaphorin_3E | 7:83148436  | 7  | 83148436  | C | G | 0.63 | 0.30  | 0.05 | 1.4E-08  |
| Semaphorin_3E | 7:83167775  | 7  | 83167775  | G | A | 0.94 | 0.72  | 0.14 | 2.8E-07  |
| Semaphorin_3E | 7:83278893  | 7  | 83278893  | T | C | 0.65 | -0.43 | 0.05 | 2.7E-16  |
| sE_Selectin   | 9:136080536 | 9  | 136080536 | G | A | 0.69 | 0.37  | 0.06 | 1.1E-09  |
| sE_Selectin   | 9:136139754 | 9  | 136139754 | T | C | 0.57 | -0.35 | 0.05 | 1.1E-11  |
| sE_Selectin   | 9:136141870 | 9  | 136141870 | C | T | 0.82 | 1.10  | 0.06 | 1.6E-82  |
| sE_Selectin   | 9:136148231 | 9  | 136148231 | T | C | 0.57 | -0.61 | 0.06 | 5.6E-28  |
| sFRP_3        | 2:183702964 | 2  | 183702964 | G | A | 0.88 | -0.70 | 0.08 | 5.2E-19  |
| sICAM_1       | 19:10394792 | 19 | 10394792  | G | A | 0.89 | 1.78  | 0.11 | 8.4E-57  |
| sICAM_1       | 19:10406635 | 19 | 10406635  | T | A | 0.55 | 1.20  | 0.04 | 2.3E-225 |
| sICAM_1       | 19:10422730 | 19 | 10422730  | G | T | 0.78 | 0.80  | 0.08 | 1.0E-25  |
| sICAM_1       | 19:10432334 | 19 | 10432334  | T | G | 0.85 | 0.52  | 0.07 | 9.1E-14  |
| sICAM_1       | 19:10462513 | 19 | 10462513  | C | T | 0.69 | -0.77 | 0.08 | 3.4E-22  |
| sICAM_5       | 10:28593981 | 10 | 28593981  | T | C | 0.91 | -0.47 | 0.11 | 1.5E-05  |

|         |              |    |           |   |   |      |       |      |         |
|---------|--------------|----|-----------|---|---|------|-------|------|---------|
| sICAM_5 | 11:125973274 | 11 | 125973274 | G | A | 0.90 | -0.44 | 0.10 | 2.5E-05 |
| sICAM_5 | 11:40058649  | 11 | 40058649  | C | A | 0.64 | 0.29  | 0.07 | 1.8E-05 |
| sICAM_5 | 11:44182483  | 11 | 44182483  | T | A | 0.63 | 0.23  | 0.05 | 1.6E-05 |
| sICAM_5 | 12:59897359  | 12 | 59897359  | G | A | 0.87 | -0.31 | 0.08 | 3.8E-05 |
| sICAM_5 | 13:47533654  | 13 | 47533654  | G | A | 0.61 | 0.22  | 0.05 | 4.1E-05 |
| sICAM_5 | 13:69004125  | 13 | 69004125  | C | T | 0.60 | 0.21  | 0.05 | 4.4E-05 |
| sICAM_5 | 14:58242572  | 14 | 58242572  | T | C | 0.87 | -0.38 | 0.09 | 1.6E-05 |
| sICAM_5 | 18:34902573  | 18 | 34902573  | C | G | 0.89 | 0.44  | 0.10 | 5.0E-06 |
| sICAM_5 | 18:34928639  | 18 | 34928639  | T | C | 0.64 | 0.26  | 0.05 | 1.7E-06 |
| sICAM_5 | 18:39315461  | 18 | 39315461  | A | T | 0.76 | 0.24  | 0.06 | 3.4E-05 |
| sICAM_5 | 18:42969806  | 18 | 42969806  | A | T | 0.68 | -0.24 | 0.06 | 3.0E-05 |
| sICAM_5 | 18:43138567  | 18 | 43138567  | C | T | 0.94 | 0.39  | 0.10 | 4.9E-05 |
| sICAM_5 | 19:10394792  | 19 | 10394792  | G | A | 0.89 | -0.81 | 0.13 | 9.4E-11 |
| sICAM_5 | 19:10402131  | 19 | 10402131  | C | T | 0.51 | 0.65  | 0.06 | 5.0E-31 |
| sICAM_5 | 19:10418661  | 19 | 10418661  | T | C | 0.67 | -0.37 | 0.09 | 1.6E-05 |
| sICAM_5 | 19:10424951  | 19 | 10424951  | C | T | 0.83 | 0.95  | 0.11 | 7.0E-17 |
| sICAM_5 | 19:10472933  | 19 | 10472933  | G | A | 0.52 | -0.38 | 0.07 | 3.0E-08 |
| sICAM_5 | 19:10959660  | 19 | 10959660  | A | T | 0.94 | 0.77  | 0.16 | 2.7E-06 |
| sICAM_5 | 1:238706527  | 1  | 238706527 | T | A | 0.53 | 0.24  | 0.06 | 1.7E-05 |
| sICAM_5 | 1:238722959  | 1  | 238722959 | A | G | 0.91 | -0.43 | 0.10 | 1.6E-05 |
| sICAM_5 | 1:73896518   | 1  | 73896518  | C | T | 0.81 | 0.31  | 0.07 | 1.4E-05 |
| sICAM_5 | 1:90568148   | 1  | 90568148  | G | A | 0.91 | 0.49  | 0.11 | 1.1E-05 |
| sICAM_5 | 22:27865878  | 22 | 27865878  | T | C | 0.80 | 0.25  | 0.06 | 3.1E-05 |
| sICAM_5 | 2:140511671  | 2  | 140511671 | T | C | 0.92 | 0.46  | 0.11 | 3.0E-05 |
| sICAM_5 | 2:217586055  | 2  | 217586055 | A | G | 0.82 | -0.28 | 0.07 | 2.2E-05 |
| sICAM_5 | 3:31691928   | 3  | 31691928  | A | G | 0.63 | 0.23  | 0.05 | 2.2E-05 |
| sICAM_5 | 3:61137550   | 3  | 61137550  | T | C | 0.54 | 0.23  | 0.05 | 4.0E-06 |
| sICAM_5 | 3:6275720    | 3  | 6275720   | A | G | 0.88 | -0.35 | 0.08 | 1.5E-05 |
| sICAM_5 | 3:9197231    | 3  | 9197231   | T | C | 0.65 | 0.31  | 0.06 | 7.5E-07 |
| sICAM_5 | 4:29798323   | 4  | 29798323  | T | G | 0.83 | 0.30  | 0.07 | 4.4E-06 |
| sICAM_5 | 4:30239088   | 4  | 30239088  | A | T | 0.94 | -0.62 | 0.14 | 1.4E-05 |
| sICAM_5 | 4:60398672   | 4  | 60398672  | A | G | 0.81 | -0.30 | 0.07 | 2.6E-05 |
| sICAM_5 | 5:162643100  | 5  | 162643100 | T | C | 0.96 | -0.66 | 0.16 | 3.7E-05 |
| sICAM_5 | 5:25407758   | 5  | 25407758  | C | T | 0.78 | -0.37 | 0.08 | 8.9E-07 |
| sICAM_5 | 5:5869722    | 5  | 5869722   | T | C | 0.59 | 0.21  | 0.05 | 3.6E-05 |
| sICAM_5 | 6:79305288   | 6  | 79305288  | G | C | 0.66 | -0.23 | 0.05 | 1.1E-05 |
| sICAM_5 | 6:84750171   | 6  | 84750171  | G | C | 0.88 | -0.38 | 0.09 | 9.5E-06 |
| sICAM_5 | 7:120209948  | 7  | 120209948 | T | C | 0.93 | -0.61 | 0.11 | 4.6E-08 |
| sICAM_5 | 7:123590489  | 7  | 123590489 | G | A | 0.85 | -0.31 | 0.07 | 1.2E-05 |
| sICAM_5 | 7:96978250   | 7  | 96978250  | G | A | 0.88 | 0.38  | 0.09 | 9.0E-06 |
| sICAM_5 | 8:14855673   | 8  | 14855673  | G | T | 0.69 | 0.23  | 0.06 | 4.4E-05 |
| sICAM_5 | 9:136151806  | 9  | 136151806 | T | C | 0.79 | 0.34  | 0.07 | 1.6E-07 |



|             |             |    |           |   |   |      |       |      |          |
|-------------|-------------|----|-----------|---|---|------|-------|------|----------|
| sICAM_5     | 9:25283201  | 9  | 25283201  | T | C | 0.56 | 0.21  | 0.05 | 3.1E-05  |
| SIG14       | 19:52130337 | 19 | 52130337  | T | C | 0.94 | 0.61  | 0.11 | 1.5E-08  |
| SIG14       | 19:52158316 | 19 | 52158316  | G | T | 0.88 | 1.13  | 0.09 | 1.7E-33  |
| SIG14       | 19:52163786 | 19 | 52163786  | G | A | 0.77 | -0.41 | 0.06 | 1.0E-11  |
| SIG14       | 19:52186090 | 19 | 52186090  | G | A | 0.66 | 0.59  | 0.06 | 1.0E-21  |
| Siglec_3    | 19:51701891 | 19 | 51701891  | A | G | 0.70 | -0.41 | 0.05 | 8.2E-14  |
| Siglec_3    | 19:51727962 | 19 | 51727962  | C | A | 0.69 | 1.08  | 0.05 | 1.7E-95  |
| Siglec_3    | 19:51780131 | 19 | 51780131  | T | C | 0.75 | 0.53  | 0.06 | 1.0E-19  |
| Siglec_3    | 19:51797119 | 19 | 51797119  | G | A | 0.58 | 0.56  | 0.06 | 5.7E-18  |
| Siglec_6    | 19:51993028 | 19 | 51993028  | T | A | 0.92 | -0.71 | 0.11 | 2.5E-10  |
| Siglec_6    | 19:52014146 | 19 | 52014146  | C | T | 0.93 | -0.59 | 0.10 | 1.6E-09  |
| Siglec_6    | 19:52033206 | 19 | 52033206  | G | A | 0.93 | -1.17 | 0.09 | 4.2E-40  |
| Siglec_6    | 19:52033742 | 19 | 52033742  | A | G | 0.59 | -0.62 | 0.05 | 1.9E-39  |
| Siglec_6    | 19:52039311 | 19 | 52039311  | C | T | 0.87 | -0.69 | 0.07 | 2.8E-21  |
| Siglec_6    | 19:52053655 | 19 | 52053655  | C | G | 0.62 | 0.31  | 0.05 | 7.7E-09  |
| Siglec_6    | 19:52058654 | 19 | 52058654  | T | A | 0.73 | -0.50 | 0.06 | 3.2E-19  |
| Siglec_9    | 19:51595560 | 19 | 51595560  | C | G | 0.79 | -0.60 | 0.07 | 8.2E-20  |
| Siglec_9    | 19:51595623 | 19 | 51595623  | T | A | 0.75 | -0.68 | 0.07 | 1.1E-20  |
| Siglec_9    | 19:51596941 | 19 | 51596941  | A | G | 0.73 | 0.63  | 0.08 | 7.3E-16  |
| Siglec_9    | 19:51597421 | 19 | 51597421  | G | A | 0.73 | 0.93  | 0.07 | 2.1E-40  |
| Siglec_9    | 19:51619495 | 19 | 51619495  | C | T | 0.93 | 0.59  | 0.11 | 3.9E-08  |
| Siglec_9    | 19:51627766 | 19 | 51627766  | G | T | 0.57 | -1.28 | 0.03 | 0.0E+00  |
| SIRT2       | 17:64190920 | 17 | 64190920  | G | T | 0.95 | -0.94 | 0.12 | 2.9E-14  |
| SLAF7       | 1:160723448 | 1  | 160723448 | T | G | 0.71 | 0.80  | 0.05 | 4.8E-55  |
| SLAF7       | 1:160754964 | 1  | 160754964 | A | G | 0.67 | -0.39 | 0.06 | 7.3E-12  |
| SLAF7       | 1:160825313 | 1  | 160825313 | C | T | 0.56 | -0.32 | 0.06 | 1.6E-08  |
| SLAF7       | 1:160845485 | 1  | 160845485 | T | C | 0.88 | 0.81  | 0.08 | 7.6E-22  |
| sLeptin_R   | 1:66014359  | 1  | 66014359  | T | C | 0.52 | 0.40  | 0.05 | 7.3E-14  |
| sLeptin_R   | 1:66053804  | 1  | 66053804  | A | T | 0.56 | 0.53  | 0.05 | 1.8E-23  |
| sLeptin_R   | 1:66063341  | 1  | 66063341  | T | C | 0.57 | -0.52 | 0.05 | 7.2E-27  |
| sLeptin_R   | 1:66069020  | 1  | 66069020  | G | A | 0.81 | 1.39  | 0.04 | 3.9E-237 |
| sLeptin_R   | 1:66143044  | 1  | 66143044  | C | T | 0.53 | -0.50 | 0.05 | 3.8E-24  |
| sL_Selectin | 1:169572947 | 1  | 169572947 | T | G | 0.56 | 0.30  | 0.05 | 1.4E-10  |
| sL_Selectin | 1:169637078 | 1  | 169637078 | C | T | 0.68 | 0.33  | 0.05 | 2.7E-09  |
| sL_Selectin | 1:169665551 | 1  | 169665551 | G | T | 0.74 | 0.52  | 0.05 | 9.7E-25  |
| SPARCL1     | 4:88384074  | 4  | 88384074  | C | T | 0.57 | -0.33 | 0.05 | 1.2E-09  |
| SPARCL1     | 4:88416223  | 4  | 88416223  | G | A | 0.60 | 0.36  | 0.05 | 8.3E-13  |
| SPARCL1     | 4:88447128  | 4  | 88447128  | A | G | 0.77 | -0.64 | 0.05 | 9.5E-33  |
| SPHK2       | 10:27905762 | 10 | 27905762  | T | C | 0.66 | -0.25 | 0.06 | 8.0E-06  |
| SPHK2       | 10:57062373 | 10 | 57062373  | A | C | 0.92 | -0.48 | 0.10 | 1.1E-06  |
| SPHK2       | 10:58923778 | 10 | 58923778  | T | C | 0.76 | 0.27  | 0.06 | 6.5E-06  |
| SPHK2       | 10:71277329 | 10 | 71277329  | G | C | 0.94 | 0.52  | 0.13 | 4.3E-05  |

|           |             |    |           |   |   |      |       |      |         |
|-----------|-------------|----|-----------|---|---|------|-------|------|---------|
| SPHK2     | 11:44568837 | 11 | 44568837  | A | G | 0.83 | -0.37 | 0.09 | 5.0E-05 |
| SPHK2     | 12:10532833 | 12 | 10532833  | T | G | 0.79 | -0.28 | 0.07 | 3.9E-05 |
| SPHK2     | 12:41020477 | 12 | 41020477  | G | C | 0.91 | -0.49 | 0.12 | 2.8E-05 |
| SPHK2     | 12:51866103 | 12 | 51866103  | C | T | 0.89 | -0.55 | 0.11 | 2.2E-07 |
| SPHK2     | 12:95387363 | 12 | 95387363  | T | C | 0.58 | 0.23  | 0.05 | 2.0E-05 |
| SPHK2     | 14:23104574 | 14 | 23104574  | A | C | 0.76 | 0.25  | 0.06 | 2.0E-05 |
| SPHK2     | 17:32069611 | 17 | 32069611  | G | A | 0.68 | -0.22 | 0.05 | 4.3E-05 |
| SPHK2     | 18:20566532 | 18 | 20566532  | A | G | 0.86 | -0.31 | 0.07 | 3.2E-05 |
| SPHK2     | 18:25976116 | 18 | 25976116  | T | C | 0.78 | 0.26  | 0.06 | 4.9E-05 |
| SPHK2     | 18:75071036 | 18 | 75071036  | G | A | 0.84 | -0.29 | 0.07 | 2.0E-05 |
| SPHK2     | 19:35806491 | 19 | 35806491  | C | T | 0.77 | 0.28  | 0.07 | 2.6E-05 |
| SPHK2     | 19:36031270 | 19 | 36031270  | C | T | 0.75 | 0.25  | 0.06 | 4.0E-05 |
| SPHK2     | 1:15119413  | 1  | 15119413  | A | G | 0.73 | -0.29 | 0.07 | 6.9E-06 |
| SPHK2     | 1:194876885 | 1  | 194876885 | A | T | 0.73 | 0.24  | 0.06 | 4.7E-05 |
| SPHK2     | 20:22400907 | 20 | 22400907  | T | G | 0.82 | -0.28 | 0.07 | 2.1E-05 |
| SPHK2     | 21:41345008 | 21 | 41345008  | G | A | 0.61 | -0.23 | 0.05 | 2.2E-05 |
| SPHK2     | 21:43169357 | 21 | 43169357  | C | G | 0.85 | 0.31  | 0.08 | 3.8E-05 |
| SPHK2     | 22:49327625 | 22 | 49327625  | C | T | 0.80 | -0.32 | 0.08 | 2.1E-05 |
| SPHK2     | 2:147027750 | 2  | 147027750 | G | A | 0.88 | -0.47 | 0.11 | 4.1E-05 |
| SPHK2     | 2:22008855  | 2  | 22008855  | T | C | 0.63 | 0.27  | 0.06 | 3.0E-05 |
| SPHK2     | 2:2540775   | 2  | 2540775   | G | A | 0.87 | 0.54  | 0.10 | 1.0E-07 |
| SPHK2     | 2:69907095  | 2  | 69907095  | A | G | 0.87 | -0.34 | 0.08 | 1.9E-05 |
| SPHK2     | 3:101609650 | 3  | 101609650 | C | T | 0.82 | 0.28  | 0.07 | 4.6E-05 |
| SPHK2     | 3:143510847 | 3  | 143510847 | C | T | 0.57 | 0.24  | 0.06 | 3.2E-05 |
| SPHK2     | 4:45184442  | 4  | 45184442  | G | A | 0.58 | -0.23 | 0.05 | 1.0E-05 |
| SPHK2     | 5:72922376  | 5  | 72922376  | G | A | 0.55 | -0.21 | 0.05 | 3.8E-05 |
| SPHK2     | 6:159259696 | 6  | 159259696 | A | G | 0.88 | 0.36  | 0.08 | 1.7E-05 |
| SPHK2     | 7:120910746 | 7  | 120910746 | G | A | 0.80 | 0.32  | 0.07 | 2.3E-06 |
| SPHK2     | 7:67904436  | 7  | 67904436  | A | G | 0.82 | -0.28 | 0.07 | 2.6E-05 |
| SPHK2     | 8:101669027 | 8  | 101669027 | G | T | 0.80 | 0.35  | 0.09 | 4.1E-05 |
| SPHK2     | 9:132337492 | 9  | 132337492 | G | A | 0.56 | -0.26 | 0.05 | 8.6E-07 |
| SPHK2     | 9:31968163  | 9  | 31968163  | T | C | 0.69 | 0.22  | 0.05 | 4.1E-05 |
| SPHK2     | 9:92211862  | 9  | 92211862  | G | A | 0.78 | 0.25  | 0.06 | 3.5E-05 |
| SPINT2    | 19:38759103 | 19 | 38759103  | T | C | 0.86 | -0.47 | 0.08 | 4.7E-10 |
| SPINT2    | 19:38760375 | 19 | 38760375  | C | T | 0.94 | 0.69  | 0.10 | 2.9E-11 |
| SPINT2    | 19:38791055 | 19 | 38791055  | C | T | 0.88 | 0.51  | 0.08 | 2.2E-10 |
| SPINT2    | 19:38791841 | 19 | 38791841  | A | G | 0.74 | 0.85  | 0.06 | 1.4E-50 |
| SPINT2    | 19:38917869 | 19 | 38917869  | A | T | 0.90 | 0.68  | 0.10 | 1.7E-12 |
| Spondin_1 | 11:14038621 | 11 | 14038621  | G | A | 0.50 | -0.39 | 0.05 | 7.3E-17 |
| Spondin_1 | 11:14106672 | 11 | 14106672  | T | A | 0.59 | 0.27  | 0.05 | 4.2E-08 |
| sRAGE     | 14:66021192 | 14 | 66021192  | G | T | 0.61 | 0.29  | 0.05 | 4.3E-08 |
| sRAGE     | 6:32133344  | 6  | 32133344  | A | C | 0.96 | 0.71  | 0.12 | 2.4E-09 |

|          |             |    |           |   |   |      |       |      |          |
|----------|-------------|----|-----------|---|---|------|-------|------|----------|
| SREC_I   | 17:1519075  | 17 | 1519075   | T | C | 0.65 | -0.85 | 0.08 | 1.4E-23  |
| SREC_I   | 17:1587212  | 17 | 1587212   | A | G | 0.79 | -0.54 | 0.06 | 4.2E-19  |
| SREC_I   | 17:1588930  | 17 | 1588930   | C | T | 0.70 | 0.51  | 0.06 | 5.6E-18  |
| ST4S6    | 9:136145425 | 9  | 136145425 | C | A | 0.79 | 0.49  | 0.07 | 6.6E-13  |
| ST4S6    | 9:136157133 | 9  | 136157133 | G | A | 0.58 | 0.39  | 0.06 | 2.8E-10  |
| STAB2    | 1:26346284  | 1  | 26346284  | C | T | 0.61 | -0.28 | 0.05 | 3.9E-07  |
| STAB2    | 1:41289993  | 1  | 41289993  | T | C | 0.69 | -0.28 | 0.06 | 3.4E-07  |
| STAB2    | 8:81613715  | 8  | 81613715  | G | T | 0.94 | 0.71  | 0.14 | 1.3E-07  |
| STAB2    | 9:122461528 | 9  | 122461528 | T | C | 0.91 | -0.49 | 0.10 | 2.2E-07  |
| sTie_1   | 3:98406794  | 3  | 98406794  | T | C | 0.54 | 0.28  | 0.05 | 2.5E-07  |
| sTie_1   | 8:94633233  | 8  | 94633233  | T | C | 0.68 | 0.27  | 0.05 | 4.7E-07  |
| sTie_1   | 9:136142185 | 9  | 136142185 | C | T | 0.92 | -1.01 | 0.09 | 7.9E-28  |
| sTie_1   | 9:136144297 | 9  | 136144297 | A | G | 0.71 | -0.51 | 0.06 | 4.3E-18  |
| sTie_1   | 9:136176125 | 9  | 136176125 | A | G | 0.79 | -0.52 | 0.08 | 4.8E-10  |
| sTie_1   | 9:136190948 | 9  | 136190948 | G | A | 0.76 | -0.38 | 0.07 | 1.6E-07  |
| sTie_2   | 9:136142185 | 9  | 136142185 | C | T | 0.92 | -0.98 | 0.09 | 8.3E-27  |
| sTie_2   | 9:136163447 | 9  | 136163447 | T | C | 0.77 | -0.54 | 0.08 | 3.0E-12  |
| sTie_2   | 9:27184940  | 9  | 27184940  | G | T | 0.94 | -0.66 | 0.11 | 7.6E-09  |
| TAFI     | 13:46513168 | 13 | 46513168  | T | A | 0.67 | 0.49  | 0.05 | 3.7E-19  |
| TAFI     | 13:46536291 | 13 | 46536291  | A | G | 0.94 | 1.20  | 0.17 | 2.4E-12  |
| TAFI     | 13:46627677 | 13 | 46627677  | C | T | 0.94 | 1.03  | 0.13 | 1.3E-16  |
| TAFI     | 13:46669550 | 13 | 46669550  | T | A | 0.56 | -1.00 | 0.05 | 9.6E-84  |
| TAFI     | 13:46675295 | 13 | 46675295  | G | T | 0.63 | 1.07  | 0.05 | 1.4E-115 |
| TAFI     | 13:46706598 | 13 | 46706598  | C | A | 0.56 | -0.30 | 0.05 | 8.1E-09  |
| TARC     | 15:93902325 | 15 | 93902325  | T | C | 0.60 | 0.27  | 0.05 | 4.3E-07  |
| TARC     | 16:57444002 | 16 | 57444002  | T | G | 0.92 | -0.43 | 0.09 | 4.8E-06  |
| TARC     | 22:45372925 | 22 | 45372925  | C | G | 0.73 | -0.27 | 0.06 | 2.9E-06  |
| TARC     | 2:31464385  | 2  | 31464385  | A | T | 0.70 | -0.26 | 0.06 | 2.8E-06  |
| TCCR     | 11:26297704 | 11 | 26297704  | G | A | 0.83 | -0.35 | 0.07 | 2.6E-07  |
| TCCR     | 12:50345206 | 12 | 50345206  | A | G | 0.51 | 0.26  | 0.05 | 2.7E-07  |
| TCCR     | 2:48736839  | 2  | 48736839  | G | A | 0.73 | 0.35  | 0.07 | 5.8E-07  |
| TCCR     | 3:94856020  | 3  | 94856020  | A | G | 0.77 | -0.30 | 0.06 | 3.7E-06  |
| TCCR     | 9:11537883  | 9  | 11537883  | A | C | 0.67 | 0.25  | 0.05 | 3.5E-06  |
| TCCR     | 9:136131461 | 9  | 136131461 | G | A | 0.92 | -0.48 | 0.10 | 5.3E-07  |
| TCCR     | 9:83282844  | 9  | 83282844  | C | T | 0.67 | -0.30 | 0.06 | 1.4E-06  |
| Tenascin | 8:27810577  | 8  | 27810577  | T | G | 0.75 | -0.38 | 0.06 | 1.8E-11  |
| Tenascin | 9:117739168 | 9  | 117739168 | G | A | 0.88 | -0.55 | 0.09 | 1.5E-10  |
| Tenascin | 9:117805201 | 9  | 117805201 | C | G | 0.86 | -1.14 | 0.07 | 1.1E-64  |
| Tenascin | 9:117823114 | 9  | 117823114 | T | C | 0.48 | 0.29  | 0.05 | 2.8E-08  |
| Tenascin | 9:117832416 | 9  | 117832416 | T | C | 0.77 | 0.37  | 0.06 | 1.4E-10  |
| Tenascin | 9:117842307 | 9  | 117842307 | G | A | 0.55 | -0.35 | 0.05 | 2.2E-11  |
| Tenascin | 9:117965039 | 9  | 117965039 | T | C | 0.93 | 0.59  | 0.11 | 3.1E-08  |

|                   |              |    |           |   |   |      |       |      |         |
|-------------------|--------------|----|-----------|---|---|------|-------|------|---------|
| Tenascin          | 9:117972357  | 9  | 117972357 | A | G | 0.56 | -0.28 | 0.05 | 4.4E-08 |
| Tenascin          | 9:118027057  | 9  | 118027057 | T | C | 0.85 | -0.45 | 0.07 | 2.8E-10 |
| TF                | 20:10551996  | 20 | 10551996  | C | T | 0.95 | -0.52 | 0.11 | 2.3E-06 |
| TF                | 2:234612690  | 2  | 234612690 | A | C | 0.54 | -0.26 | 0.05 | 4.2E-07 |
| TF                | 8:68319668   | 8  | 68319668  | G | A | 0.89 | 0.40  | 0.08 | 2.1E-06 |
| TFPI              | 11:100008998 | 11 | 100008998 | C | T | 0.69 | -0.29 | 0.05 | 1.8E-07 |
| TFPI              | 1:169467610  | 1  | 169467610 | G | A | 0.93 | 0.55  | 0.10 | 7.5E-08 |
| TFPI              | 1:169513436  | 1  | 169513436 | C | A | 0.76 | -0.34 | 0.06 | 2.3E-09 |
| TIG2              | 7:150045302  | 7  | 150045302 | G | A | 0.74 | -0.41 | 0.06 | 4.0E-13 |
| TIMD3             | 5:156376703  | 5  | 156376703 | G | A | 0.93 | -0.51 | 0.09 | 1.2E-08 |
| TIMD3             | 5:156480648  | 5  | 156480648 | T | A | 0.63 | -0.37 | 0.06 | 3.0E-09 |
| TIMD3             | 5:156532366  | 5  | 156532366 | A | C | 0.83 | -0.74 | 0.06 | 4.3E-33 |
| TIMD3             | 5:156574889  | 5  | 156574889 | A | G | 0.66 | -0.31 | 0.05 | 8.9E-09 |
| TIMP_2            | 14:74162845  | 14 | 74162845  | C | G | 0.85 | 0.33  | 0.07 | 3.1E-06 |
| TIMP_2            | 2:27598097   | 2  | 27598097  | C | T | 0.55 | 0.26  | 0.06 | 3.9E-06 |
| TIMP_2            | 4:123782568  | 4  | 123782568 | C | A | 0.84 | -0.47 | 0.10 | 1.0E-06 |
| TIMP_2            | 5:161217476  | 5  | 161217476 | G | A | 0.69 | 0.26  | 0.06 | 3.6E-06 |
| TIMP_2            | 6:119721494  | 6  | 119721494 | A | C | 0.55 | -0.26 | 0.05 | 2.4E-06 |
| TIMP_3            | 22:33160208  | 22 | 33160208  | C | T | 0.72 | -0.66 | 0.05 | 6.6E-39 |
| TIMP_3            | 22:33178147  | 22 | 33178147  | C | T | 0.91 | -0.64 | 0.09 | 1.6E-11 |
| TIMP_3            | 22:33224439  | 22 | 33224439  | C | T | 0.63 | 0.41  | 0.05 | 6.3E-16 |
| TIMP_3            | 22:33241769  | 22 | 33241769  | T | C | 0.75 | 0.41  | 0.06 | 5.0E-12 |
| TIMP_3            | 22:33266865  | 22 | 33266865  | T | C | 0.81 | -0.36 | 0.07 | 2.7E-08 |
| TLR4_MD_2_complex | 9:120315320  | 9  | 120315320 | C | T | 0.93 | 0.60  | 0.12 | 2.0E-07 |
| TLR4_MD_2_complex | 9:120475302  | 9  | 120475302 | A | G | 0.93 | 1.13  | 0.10 | 2.3E-29 |
| TLR4_MD_2_complex | 9:120629344  | 9  | 120629344 | C | T | 0.85 | 0.41  | 0.08 | 3.9E-07 |
| TPSB2             | 10:13740314  | 10 | 13740314  | T | C | 0.76 | 0.25  | 0.06 | 2.3E-05 |
| TPSB2             | 10:22976697  | 10 | 22976697  | T | C | 0.95 | -0.62 | 0.13 | 6.8E-07 |
| TPSB2             | 12:129477365 | 12 | 129477365 | C | T | 0.81 | -0.32 | 0.06 | 6.7E-07 |
| TPSB2             | 12:49268519  | 12 | 49268519  | G | A | 0.92 | -0.37 | 0.09 | 4.5E-05 |
| TPSB2             | 13:32715398  | 13 | 32715398  | T | C | 0.90 | 0.34  | 0.08 | 4.8E-05 |
| TPSB2             | 14:69177725  | 14 | 69177725  | T | A | 0.94 | -0.48 | 0.12 | 4.5E-05 |
| TPSB2             | 14:77079823  | 14 | 77079823  | T | C | 0.82 | 0.28  | 0.07 | 4.3E-05 |
| TPSB2             | 15:24105353  | 15 | 24105353  | A | G | 0.91 | -0.46 | 0.11 | 2.0E-05 |
| TPSB2             | 15:48104128  | 15 | 48104128  | C | T | 0.88 | -0.33 | 0.07 | 9.3E-06 |
| TPSB2             | 15:62925509  | 15 | 62925509  | C | T | 0.90 | -0.37 | 0.08 | 9.7E-06 |
| TPSB2             | 16:1261219   | 16 | 1261219   | G | A | 0.60 | -0.75 | 0.07 | 1.8E-26 |
| TPSB2             | 16:1337123   | 16 | 1337123   | C | T | 0.90 | -0.51 | 0.11 | 1.8E-06 |
| TPSB2             | 17:55755726  | 17 | 55755726  | A | G | 0.88 | 0.42  | 0.09 | 2.2E-06 |
| TPSB2             | 17:65491018  | 17 | 65491018  | G | T | 0.92 | 0.42  | 0.10 | 1.8E-05 |
| TPSB2             | 18:73824773  | 18 | 73824773  | A | T | 0.91 | -0.41 | 0.10 | 1.9E-05 |
| TPSB2             | 1:33319277   | 1  | 33319277  | A | G | 0.90 | -0.36 | 0.09 | 3.8E-05 |

|           |             |    |           |   |   |      |       |      |         |
|-----------|-------------|----|-----------|---|---|------|-------|------|---------|
| TPSB2     | 1:76792423  | 1  | 76792423  | G | A | 0.88 | 0.32  | 0.08 | 2.2E-05 |
| TPSB2     | 21:22512056 | 21 | 22512056  | C | A | 0.63 | 0.25  | 0.05 | 2.0E-06 |
| TPSB2     | 22:31618597 | 22 | 31618597  | A | G | 0.65 | 0.26  | 0.06 | 4.2E-05 |
| TPSB2     | 2:186881195 | 2  | 186881195 | T | A | 0.86 | 0.33  | 0.08 | 3.2E-05 |
| TPSB2     | 2:195042006 | 2  | 195042006 | T | C | 0.83 | 0.46  | 0.08 | 4.7E-08 |
| TPSB2     | 2:239367057 | 2  | 239367057 | G | A | 0.66 | 0.23  | 0.05 | 1.5E-05 |
| TPSB2     | 2:32364093  | 2  | 32364093  | C | T | 0.69 | 0.23  | 0.05 | 3.1E-05 |
| TPSB2     | 3:49940078  | 3  | 49940078  | C | T | 0.93 | 0.45  | 0.11 | 3.7E-05 |
| TPSB2     | 3:89261061  | 3  | 89261061  | G | A | 0.83 | 0.27  | 0.07 | 3.7E-05 |
| TPSB2     | 4:28440972  | 4  | 28440972  | C | T | 0.51 | -0.23 | 0.05 | 1.2E-05 |
| TPSB2     | 4:41536714  | 4  | 41536714  | C | G | 0.93 | -0.43 | 0.10 | 4.2E-05 |
| TPSB2     | 4:6054719   | 4  | 6054719   | C | G | 0.83 | 0.29  | 0.07 | 3.0E-05 |
| TPSB2     | 4:72604344  | 4  | 72604344  | C | T | 0.70 | -0.23 | 0.06 | 3.4E-05 |
| TPSB2     | 5:42795088  | 5  | 42795088  | A | G | 0.73 | 0.24  | 0.06 | 2.4E-05 |
| TPSB2     | 6:132822306 | 6  | 132822306 | C | T | 0.91 | -0.49 | 0.11 | 1.5E-05 |
| TPSB2     | 6:137316830 | 6  | 137316830 | C | T | 0.75 | -0.32 | 0.07 | 1.7E-05 |
| TPSB2     | 6:147080353 | 6  | 147080353 | A | G | 0.77 | 0.25  | 0.06 | 3.2E-05 |
| TPSB2     | 6:161206213 | 6  | 161206213 | C | T | 0.62 | -0.23 | 0.05 | 2.4E-05 |
| TPSB2     | 7:38174213  | 7  | 38174213  | T | C | 0.88 | 0.43  | 0.10 | 1.1E-05 |
| TPSB2     | 7:5038559   | 7  | 5038559   | G | C | 0.77 | -0.30 | 0.07 | 3.0E-05 |
| TPSB2     | 8:62382763  | 8  | 62382763  | A | T | 0.90 | -0.35 | 0.08 | 2.2E-05 |
| TPSB2     | 9:100276776 | 9  | 100276776 | T | C | 0.58 | -0.26 | 0.06 | 1.0E-05 |
| TPSB2     | 9:16571394  | 9  | 16571394  | G | A | 0.91 | 0.42  | 0.10 | 3.0E-05 |
| TPSB2     | 9:38533004  | 9  | 38533004  | T | C | 0.74 | -0.30 | 0.07 | 2.7E-05 |
| Trypsin_2 | 7:142503071 | 7  | 142503071 | C | A | 0.49 | 0.26  | 0.05 | 1.5E-07 |
| TSG_6     | 20:15057002 | 20 | 15057002  | T | A | 0.58 | -0.25 | 0.05 | 4.1E-06 |
| TSG_6     | 2:152142088 | 2  | 152142088 | C | T | 0.61 | -0.35 | 0.05 | 4.9E-12 |
| TSG_6     | 2:152206720 | 2  | 152206720 | C | T | 0.54 | -0.33 | 0.05 | 1.2E-10 |
| TSG_6     | 2:152216048 | 2  | 152216048 | A | G | 0.86 | 0.39  | 0.07 | 2.2E-07 |
| TSG_6     | 9:341063    | 9  | 341063    | A | C | 0.52 | -0.27 | 0.06 | 3.3E-06 |
| TSP2      | 6:169617889 | 6  | 169617889 | G | A | 0.91 | -0.83 | 0.08 | 9.1E-26 |
| TSP2      | 6:169647022 | 6  | 169647022 | T | C | 0.73 | -0.35 | 0.06 | 2.8E-10 |
| TSP2      | 6:169650165 | 6  | 169650165 | G | A | 0.77 | -0.38 | 0.06 | 3.5E-10 |
| TXD12     | 3:48525955  | 3  | 48525955  | A | T | 0.67 | -0.33 | 0.06 | 9.4E-09 |
| TXD12     | 3:48635432  | 3  | 48635432  | G | A | 0.92 | -0.71 | 0.10 | 2.1E-12 |
| TXD12     | 3:48768586  | 3  | 48768586  | C | T | 0.89 | -0.90 | 0.13 | 2.3E-12 |
| TXD12     | 3:49224316  | 3  | 49224316  | G | A | 0.68 | 0.59  | 0.08 | 4.9E-14 |
| TXD12     | 3:49335745  | 3  | 49335745  | C | T | 0.92 | 1.11  | 0.09 | 3.1E-33 |
| TXD12     | 3:49444904  | 3  | 49444904  | C | T | 0.66 | 0.41  | 0.06 | 7.1E-11 |
| TXD12     | 3:49502779  | 3  | 49502779  | G | A | 0.88 | -0.95 | 0.09 | 3.7E-26 |
| TXD12     | 3:49651534  | 3  | 49651534  | C | T | 0.89 | -1.06 | 0.09 | 4.3E-31 |
| TXD12     | 3:49899795  | 3  | 49899795  | G | A | 0.57 | 0.40  | 0.05 | 1.8E-15 |

|          |             |    |           |   |   |      |       |      |         |
|----------|-------------|----|-----------|---|---|------|-------|------|---------|
| TXD12    | 3:50250747  | 3  | 50250747  | C | T | 0.88 | 0.48  | 0.09 | 4.4E-07 |
| TXD12    | 3:50764842  | 3  | 50764842  | A | G | 0.93 | -1.06 | 0.16 | 1.8E-11 |
| UNC5H3   | 4:96437762  | 4  | 96437762  | G | A | 0.67 | -0.27 | 0.05 | 3.1E-08 |
| UNC5H3   | 4:96558214  | 4  | 96558214  | A | T | 0.53 | 0.37  | 0.05 | 3.1E-14 |
| UNC5H3   | 4:96624466  | 4  | 96624466  | C | A | 0.82 | 0.35  | 0.06 | 1.3E-08 |
| uPA      | 10:75653904 | 10 | 75653904  | T | A | 0.58 | -0.28 | 0.05 | 2.3E-08 |
| VEGF_sR2 | 9:136148231 | 9  | 136148231 | T | C | 0.57 | -0.31 | 0.06 | 4.8E-08 |
| VEGF_sR2 | 9:136155000 | 9  | 136155000 | C | T | 0.82 | 0.47  | 0.07 | 2.9E-12 |
| VEGF_sR3 | 13:92569206 | 13 | 92569206  | A | G | 0.84 | 0.35  | 0.08 | 3.7E-06 |
| VEGF_sR3 | 14:62450377 | 14 | 62450377  | T | A | 0.61 | 0.27  | 0.05 | 2.7E-07 |
| VEGF_sR3 | 17:73551200 | 17 | 73551200  | A | G | 0.56 | -0.24 | 0.05 | 2.1E-06 |
| VEGF_sR3 | 3:98261407  | 3  | 98261407  | C | G | 0.69 | -0.40 | 0.06 | 3.9E-11 |
| VEGF_sR3 | 3:98279115  | 3  | 98279115  | T | C | 0.82 | 0.44  | 0.08 | 2.1E-07 |
| VEGF_sR3 | 3:98282957  | 3  | 98282957  | T | G | 0.62 | 0.30  | 0.06 | 7.4E-07 |
| VEGF_sR3 | 3:98287344  | 3  | 98287344  | A | G | 0.94 | 0.81  | 0.17 | 2.9E-06 |
| VEGF_sR3 | 3:98287817  | 3  | 98287817  | T | G | 0.76 | -0.37 | 0.06 | 2.2E-09 |
| VEGF_sR3 | 3:98396350  | 3  | 98396350  | C | T | 0.92 | -0.83 | 0.11 | 1.4E-13 |
| VEGF_sR3 | 3:98406794  | 3  | 98406794  | T | C | 0.54 | 0.84  | 0.05 | 3.0E-77 |
| VEGF_sR3 | 3:98430494  | 3  | 98430494  | T | C | 0.82 | -0.33 | 0.07 | 6.5E-07 |
| VEGF_sR3 | 3:98447074  | 3  | 98447074  | C | T | 0.78 | -0.49 | 0.06 | 1.6E-14 |
| VEGF_sR3 | 3:98489686  | 3  | 98489686  | A | G | 0.60 | -0.38 | 0.06 | 2.0E-10 |
| VEGF_sR3 | 3:98516386  | 3  | 98516386  | C | G | 0.84 | -0.48 | 0.08 | 8.8E-09 |
| VEGF_sR3 | 9:136045486 | 9  | 136045486 | G | A | 0.72 | 0.31  | 0.06 | 3.0E-07 |
| VEGF_sR3 | 9:136131905 | 9  | 136131905 | T | C | 0.65 | -0.30 | 0.05 | 3.4E-08 |
| VEGF_sR3 | 9:136148000 | 9  | 136148000 | G | A | 0.59 | -0.43 | 0.06 | 6.4E-13 |
| VEGF_sR3 | 9:136149399 | 9  | 136149399 | G | A | 0.82 | 0.77  | 0.06 | 4.0E-33 |
| VEGF_sR3 | 9:136163447 | 9  | 136163447 | T | C | 0.77 | -0.42 | 0.08 | 1.1E-07 |
| vWF      | 9:136131315 | 9  | 136131315 | C | G | 0.92 | -0.53 | 0.09 | 2.3E-08 |
| vWF      | 9:136137106 | 9  | 136137106 | G | A | 0.68 | -0.51 | 0.05 | 1.1E-23 |
| WFKN2    | 17:48919039 | 17 | 48919039  | T | C | 0.68 | -0.58 | 0.05 | 9.4E-30 |
| WISP_1   | 17:26592946 | 17 | 26592946  | C | T | 0.53 | -0.31 | 0.05 | 4.9E-09 |

**Supplementary Table 4:** Variance in the plasma levels of a protein explained by the predicted biomarker in the MDCS validation set. R-squared values are adjusted for age and sex.

| <b>Protein</b>         | <b>r-square</b> |
|------------------------|-----------------|
| sLeptin R              | 0.65            |
| Cripto                 | 0.65            |
| PPAC                   | 0.64            |
| PDGF Rb                | 0.62            |
| Siglec 9               | 0.61            |
| MSP                    | 0.59            |
| BST1                   | 0.57            |
| ARTS1                  | 0.53            |
| IL 6 sRa               | 0.52            |
| sICAM 1                | 0.51            |
| MIP 5                  | 0.47            |
| Hemopexin              | 0.44            |
| Gro a                  | 0.44            |
| Kininogen HMW          | 0.44            |
| MICA                   | 0.44            |
| EphA1                  | 0.43            |
| MP2K4                  | 0.43            |
| Siglec 3               | 0.42            |
| Haptoglobin Mixed Type | 0.40            |
| SAA                    | 0.40            |
| HRG                    | 0.39            |
| HGFA                   | 0.39            |
| CAMK1                  | 0.38            |
| IL 1 R AcP             | 0.36            |
| DC SIGN                | 0.36            |
| ILT 2                  | 0.36            |
| kallikrein 12          | 0.35            |
| sE Selectin            | 0.35            |
| TIMP 3                 | 0.35            |
| Coagulation Factor VII | 0.34            |
| IL 17 sR               | 0.33            |
| SPINT2                 | 0.33            |
| Chitotriosidase 1      | 0.32            |
| HCG                    | 0.32            |
| VEGF sR3               | 0.31            |
| CNTN2                  | 0.31            |

|                       |      |
|-----------------------|------|
| TXD12                 | 0.31 |
| Semaphorin 3E         | 0.29 |
| HCC 4                 | 0.29 |
| MBL                   | 0.29 |
| SLAF7                 | 0.27 |
| CYTD                  | 0.27 |
| ILT 4                 | 0.27 |
| Prekallikrein         | 0.27 |
| MIA                   | 0.26 |
| ASAHL                 | 0.25 |
| SIG14                 | 0.25 |
| IL 18 Ra              | 0.24 |
| IL 1 R4               | 0.24 |
| CPNE1                 | 0.24 |
| FCN2                  | 0.24 |
| TAFI                  | 0.23 |
| Coagulation Factor XI | 0.23 |
| MCP 3                 | 0.22 |
| Tenascin              | 0.22 |
| ATS13                 | 0.21 |
| KYNU                  | 0.21 |
| HCC 1                 | 0.21 |
| RAP                   | 0.21 |
| Granulysin            | 0.20 |
| PCSK7                 | 0.20 |
| MICB                  | 0.19 |
| IGF II receptor       | 0.18 |
| CD109                 | 0.18 |
| AK1A1                 | 0.18 |
| GCP 2                 | 0.17 |
| ECM1                  | 0.17 |
| sTie 1                | 0.17 |
| Angiogenin            | 0.17 |
| Fucosyltransferase 3  | 0.17 |
| ASAH2                 | 0.17 |
| CYTN                  | 0.16 |
| PARC                  | 0.16 |
| Factor B              | 0.15 |
| Lysozyme              | 0.14 |
| GRN                   | 0.14 |



|                       |      |
|-----------------------|------|
| Carbonic anhydrase 6  | 0.14 |
| GPC5                  | 0.13 |
| Ck b 8 1              | 0.13 |
| IR                    | 0.13 |
| Protein C             | 0.13 |
| PD L2                 | 0.13 |
| C34 gp41 HIV Fragment | 0.13 |
| Factor H              | 0.13 |
| sL Selectin           | 0.13 |
| FUT5                  | 0.13 |
| C1 Esterase Inhibitor | 0.13 |
| ENTP5                 | 0.13 |
| Cathepsin S           | 0.12 |
| Kallikrein 11         | 0.12 |
| TIMD3                 | 0.12 |
| Siglec 6              | 0.12 |
| Kallistatin           | 0.12 |
| NPS PLA2              | 0.11 |
| P Selectin            | 0.11 |
| WFKN2                 | 0.11 |
| SPARCL1               | 0.11 |
| C4                    | 0.11 |
| a2 HS Glycoprotein    | 0.11 |
| PPID                  | 0.11 |
| TSP2                  | 0.11 |
| IDUA                  | 0.10 |
| CYTT                  | 0.10 |
| SREC I                | 0.10 |
| C7                    | 0.10 |
| CDON                  | 0.10 |
| IL 17E                | 0.10 |
| MPIF 1                | 0.10 |
| Esterase D            | 0.10 |
| BGH3                  | 0.10 |
| C1s                   | 0.10 |
| Cadherin 5            | 0.09 |
| DERM                  | 0.09 |
| sICAM 5               | 0.09 |
| CYTF                  | 0.09 |
| Plasminogen           | 0.09 |

|                               |      |
|-------------------------------|------|
| TIG2                          | 0.09 |
| PPIE                          | 0.09 |
| Heparin cofactor II           | 0.08 |
| vWF                           | 0.08 |
| VEGF sR2                      | 0.08 |
| CD36 ANTIGEN                  | 0.08 |
| TSG 6                         | 0.08 |
| sRAGE                         | 0.08 |
| TLR4 MD 2 complex             | 0.07 |
| Galectin 3                    | 0.07 |
| CLM6                          | 0.07 |
| a1 Antitrypsin                | 0.07 |
| DAF                           | 0.07 |
| GPVI                          | 0.07 |
| sFRP 3                        | 0.07 |
| gp130 soluble                 | 0.07 |
| Coagulation Factor V          | 0.07 |
| sTie 2                        | 0.07 |
| b Endorphin                   | 0.07 |
| Spondin 1                     | 0.07 |
| Apo E3                        | 0.07 |
| CATZ                          | 0.07 |
| MMP 12                        | 0.06 |
| NRP1                          | 0.06 |
| NXPH1                         | 0.06 |
| Apo E2                        | 0.06 |
| C4b                           | 0.06 |
| HAI 1                         | 0.06 |
| Endoglin                      | 0.06 |
| MP2K2                         | 0.05 |
| G CSF                         | 0.05 |
| WISP 1                        | 0.05 |
| CD27                          | 0.05 |
| Luteinizing hormone           | 0.05 |
| MIP 1a                        | 0.05 |
| ADAMTS 5                      | 0.05 |
| IL 17 RD                      | 0.05 |
| MMP 1                         | 0.05 |
| RET                           | 0.05 |
| complement factor H related 5 | 0.05 |

|                           |      |
|---------------------------|------|
| IGFBP 7                   | 0.05 |
| BPI                       | 0.05 |
| Cathepsin A               | 0.05 |
| annexin II                | 0.05 |
| IL 5 Ra                   | 0.04 |
| Cathepsin B               | 0.04 |
| ROR1                      | 0.04 |
| EPHB2                     | 0.04 |
| CD23                      | 0.04 |
| IGFBP 3                   | 0.04 |
| Semaphorin 3A             | 0.04 |
| OX2G                      | 0.04 |
| Carbonic anhydrase XIII   | 0.04 |
| Angiotensinogen           | 0.04 |
| Met                       | 0.03 |
| IL 1 sRI                  | 0.03 |
| IL 17B R                  | 0.03 |
| FCRL3                     | 0.03 |
| MAPKAPK3                  | 0.03 |
| IL 18 Rb                  | 0.03 |
| GFRa 2                    | 0.03 |
| Cystatin C                | 0.03 |
| Kallikrein 7              | 0.03 |
| UNC5H3                    | 0.03 |
| Apo E                     | 0.03 |
| Eotaxin                   | 0.03 |
| TFPI                      | 0.03 |
| Alkaline phosphatase bone | 0.03 |
| Factor I                  | 0.03 |
| PIGR                      | 0.03 |
| CAPG                      | 0.03 |
| a1 Antichymotrypsin       | 0.02 |
| NKp30                     | 0.02 |
| CD30 Ligand               | 0.02 |
| Contactin 5               | 0.02 |
| NCAM 120                  | 0.02 |
| MMP 7                     | 0.02 |
| NAGK                      | 0.02 |
| Elafin                    | 0.02 |
| CAMK1D                    | 0.02 |

|             |       |
|-------------|-------|
| FCG3B       | 0.02  |
| contactin 1 | 0.02  |
| Ficolin 3   | 0.02  |
| CLC1B       | 0.02  |
| MO2R1       | 0.02  |
| Trypsin 2   | 0.02  |
| PLXC1       | 0.02  |
| ST4S6       | 0.02  |
| ETHE1       | 0.01  |
| ER          | 0.01  |
| LY9         | 0.01  |
| Catalase    | 0.01  |
| Nidogen     | 0.01  |
| IL 12 Rb1   | 0.01  |
| TPSB2       | 0.01  |
| IL 15 Ra    | 0.01  |
| RGM C       | 0.01  |
| Apo E4      | 0.01  |
| KI2L4       | 0.01  |
| IL 1Rrp2    | 0.01  |
| RELT        | 0.01  |
| uPA         | 0.01  |
| Contactin 4 | 0.01  |
| SIRT2       | 0.01  |
| JAG1        | 0.01  |
| Fibronectin | 0.01  |
| Layilin     | 0.01  |
| ARSB        | 0.01  |
| DBNL        | 0.01  |
| IL 19       | 0.01  |
| GPNMB       | 0.01  |
| TCCR        | 0.01  |
| SPHK2       | 0.01  |
| TARC        | 0.005 |
| IL 5        | 0.004 |
| IL 23 R     | 0.004 |
| IL 27       | 0.003 |
| CK MB       | 0.003 |
| MASP3       | 0.003 |
| 6Ckine      | 0.003 |

|                                |       |
|--------------------------------|-------|
| IL 1a                          | 0.003 |
| LCMT1                          | 0.002 |
| IL 10 Rb                       | 0.002 |
| IL 11 RA                       | 0.002 |
| MMP 8                          | 0.002 |
| TF                             | 0.001 |
| PGRP S                         | 0.001 |
| TIMP 2                         | 0.001 |
| STAB2                          | 0.001 |
| Myeloperoxidase                | 0.001 |
| MIF                            | 0.001 |
| discoidin domain receptor 1    | 0.001 |
| MIP 3b                         | 0.001 |
| Ferritin                       | 0.001 |
| BCAM                           | 0.001 |
| C8                             | 0.001 |
| CD48                           | 0.001 |
| DnaJ homolog                   | 0.000 |
| FN1 3                          | 0.000 |
| GFRa 1                         | 0.000 |
| PDE3A                          | 0.000 |
| FCG2A B                        | 0.000 |
| BSSP4                          | 0.000 |
| Mesothelin                     | 0.000 |
| DKK3                           | 0.000 |
| FN1 4                          | 0.000 |
| OCAD1                          | 0.000 |
| NKG2D                          | 0.000 |
| Endothelin converting enzyme 1 | 0.000 |
| MIS                            | 0.000 |
| Notch 1                        | 0.000 |
| PSA                            | 0.000 |

**Supplementary Table 5: Significant associations between a genetically predicted protein levels and a EHR phenotype (FDR  $q < 0.1$ ).**

Association statistics are shown for each of the predictors generated for the protein.

| Protein Identifier | Clinical phenotype/diagnosis                                      | Phenotype category | Cases  | Controls | Odds-ratio | 95% confidence interval | p-value | FDR p-value |
|--------------------|-------------------------------------------------------------------|--------------------|--------|----------|------------|-------------------------|---------|-------------|
| Angiotensinogen    | Degeneration of intervertebral disc                               | Joint disease      | 4,074  | 26,083   | 1.07       | (1.04-1.11)             | 1.5E-05 | 2.3E-02     |
| annexin II         | Cellulitis and abscess of fingers/toes                            | Dermatology        | 977    | 30,631   | 0.88       | (0.82-0.94)             | 9.5E-05 | 9.9E-02     |
| Apo E              | Hypercholesterolemia                                              | Lipid disorders    | 8,511  | 13,436   | 1.07       | (1.04-1.11)             | 6.2E-06 | 1.1E-02     |
| Apo E              | Hyperlipidemia                                                    | Lipid disorders    | 22,646 | 14,038   | 1.05       | (1.02-1.07)             | 4.7E-05 | 5.9E-02     |
| Apo E              | Disorders of lipid metabolism                                     | Lipid disorders    | 22,733 | 14,038   | 1.05       | (1.02-1.07)             | 6.2E-05 | 7.4E-02     |
| Apo E2             | Dementias                                                         | Dementias          | 1,832  | 28,323   | 1.42       | (1.34-1.50)             | 1.1E-35 | 2.6E-30     |
| Apo E2             | Alzheimer's disease                                               | Dementias          | 829    | 24,093   | 1.62       | (1.49-1.75)             | 1.3E-31 | 1.4E-26     |
| Apo E2             | Delirium dementia and amnestic and other cognitive disorders      | Dementias          | 2,478  | 28,323   | 1.28       | (1.23-1.34)             | 6.4E-27 | 3.7E-22     |
| Apo E2             | Other persistent mental disorders due to conditions classified el | Dementias          | 1,516  | 29,922   | 1.27       | (1.20-1.34)             | 4.6E-17 | 9.6E-13     |
| Apo E2             | Memory loss                                                       | Dementias          | 1,189  | 29,922   | 1.26       | (1.18-1.33)             | 7.6E-14 | 7.6E-10     |
| Apo E2             | Hyperlipidemia                                                    | Lipid disorders    | 22,646 | 14,038   | 1.09       | (1.06-1.11)             | 1.2E-12 | 1.0E-08     |
| Apo E2             | Disorders of lipid metabolism                                     | Lipid disorders    | 22,733 | 14,038   | 1.09       | (1.06-1.11)             | 1.5E-12 | 1.2E-08     |
| Apo E2             | Hypercholesterolemia                                              | Lipid disorders    | 8,511  | 13,436   | 1.10       | (1.07-1.14)             | 4.1E-10 | 2.3E-06     |
| Apo E2             | Senile dementia                                                   | Dementias          | 558    | 12,015   | 1.34       | (1.21-1.47)             | 6.0E-09 | 2.9E-05     |
| Apo E2             | Neurological disorders                                            | Dementias          | 4,351  | 30,977   | 1.10       | (1.06-1.14)             | 1.4E-08 | 5.6E-05     |
| Apo E2             | Macular degeneration (senile) of retina NOS                       | Eye disorders      | 1,094  | 21,702   | 0.83       | (0.77-0.89)             | 1.7E-07 | 5.3E-04     |
| Apo E2             | Specific nonpsychotic mental disorders due to brain damage        | Dementias          | 461    | 22,355   | 1.31       | (1.18-1.45)             | 2.4E-07 | 7.2E-04     |
| Apo E2             | Mixed hyperlipidemia                                              | Lipid disorders    | 5,717  | 14,137   | 1.07       | (1.04-1.11)             | 1.7E-05 | 2.5E-02     |
| Apo E2             | Hyperglyceridemia                                                 | Lipid disorders    | 953    | 12,638   | 1.16       | (1.08-1.25)             | 7.3E-05 | 8.3E-02     |
| Apo E3             | Dementias                                                         | Dementias          | 1,832  | 28,323   | 1.36       | (1.29-1.44)             | 8.4E-28 | 6.5E-23     |
| Apo E3             | Alzheimer's disease                                               | Dementias          | 829    | 24,093   | 1.51       | (1.39-1.64)             | 1.4E-23 | 6.2E-19     |
| Apo E3             | Delirium dementia and amnestic and other cognitive disorders      | Dementias          | 2,478  | 28,323   | 1.25       | (1.19-1.30)             | 4.3E-21 | 1.2E-16     |

|        |                                                                   |                 |        |        |      |             |         |         |
|--------|-------------------------------------------------------------------|-----------------|--------|--------|------|-------------|---------|---------|
| Apo E3 | Other persistent mental disorders due to conditions classified el | Dementias       | 1,516  | 29,922 | 1.24 | (1.18-1.32) | 2.7E-14 | 3.5E-10 |
| Apo E3 | Hyperlipidemia                                                    | Lipid disorders | 22,646 | 14,038 | 1.09 | (1.07-1.12) | 6.0E-14 | 6.3E-10 |
| Apo E3 | Disorders of lipid metabolism                                     | Lipid disorders | 22,733 | 14,038 | 1.09 | (1.07-1.11) | 9.1E-14 | 8.4E-10 |
| Apo E3 | Hypercholesterolemia                                              | Lipid disorders | 8,511  | 13,436 | 1.12 | (1.08-1.15) | 4.5E-12 | 3.2E-08 |
| Apo E3 | Memory loss                                                       | Dementias       | 1,189  | 29,922 | 1.23 | (1.15-1.30) | 3.7E-11 | 2.5E-07 |
| Apo E3 | Hyperglyceridemia                                                 | Lipid disorders | 953    | 12,638 | 1.20 | (1.12-1.29) | 8.7E-07 | 2.3E-03 |
| Apo E3 | Neurological disorders                                            | Dementias       | 4,351  | 30,977 | 1.08 | (1.05-1.12) | 1.4E-06 | 3.3E-03 |
| Apo E3 | Senile dementia                                                   | Dementias       | 558    | 12,015 | 1.27 | (1.15-1.40) | 1.5E-06 | 3.6E-03 |
| Apo E3 | Mixed hyperlipidemia                                              | Lipid disorders | 5,717  | 14,137 | 1.08 | (1.05-1.12) | 1.5E-06 | 3.6E-03 |
| Apo E3 | Macular degeneration (senile) of retina NOS                       | Eye disorders   | 1,094  | 21,702 | 0.85 | (0.79-0.91) | 2.6E-06 | 5.4E-03 |
| Apo E3 | Specific nonpsychotic mental disorders due to brain damage        | Dementias       | 461    | 22,355 | 1.27 | (1.15-1.41) | 4.3E-06 | 8.5E-03 |
| Apo E3 | Calculus of bile duct                                             | Liver disease   | 308    | 32,702 | 0.80 | (0.71-0.89) | 7.5E-05 | 8.3E-02 |
| Apo E4 | Hypercholesterolemia                                              | Lipid disorders | 8,511  | 13,436 | 1.07 | (1.04-1.11) | 5.7E-06 | 1.0E-02 |
| Apo E4 | Hyperlipidemia                                                    | Lipid disorders | 22,646 | 14,038 | 1.05 | (1.02-1.07) | 4.3E-05 | 5.6E-02 |
| Apo E4 | Disorders of lipid metabolism                                     | Lipid disorders | 22,733 | 14,038 | 1.05 | (1.02-1.07) | 5.8E-05 | 6.9E-02 |
| ASAHL  | Chronic liver disease and cirrhosis                               | Liver disease   | 2,064  | 28,645 | 1.10 | (1.05-1.15) | 8.7E-05 | 9.4E-02 |
| ATS13  | Pancytopenia                                                      | Other           | 613    | 20,955 | 0.86 | (0.80-0.92) | 4.6E-05 | 5.8E-02 |
| ATS13  | Aplastic anemia                                                   | Other           | 841    | 22,449 | 0.88 | (0.82-0.94) | 8.2E-05 | 8.9E-02 |
| BCAM   | Deep vein thrombosis [DVT]                                        | Thrombosis      | 1,491  | 23,786 | 1.14 | (1.08-1.20) | 1.3E-06 | 3.3E-03 |
| BCAM   | Other venous embolism and thrombosis                              | Thrombosis      | 3,537  | 23,786 | 1.09 | (1.05-1.13) | 3.4E-06 | 6.9E-03 |
| BCAM   | Disorder of skin and subcutaneous tissue NOS                      | Dermatology     | 4,036  | 32,157 | 0.92 | (0.88-0.95) | 9.8E-06 | 1.6E-02 |
| C4     | Type 1 diabetes with renal manifestations                         | Autoimmune      | 311    | 17,918 | 0.71 | (0.63-0.79) | 2.0E-09 | 1.2E-05 |
| C4     | Type 1 diabetes with ophthalmic manifestations                    | Autoimmune      | 324    | 17,982 | 0.72 | (0.64-0.80) | 7.0E-09 | 3.2E-05 |
| C4     | Type 1 diabetes with neurological manifestations                  | Autoimmune      | 498    | 20,002 | 0.79 | (0.72-0.86) | 2.3E-07 | 6.9E-04 |
| C4     | Diabetic retinopathy                                              | Eye disorders   | 1,211  | 29,679 | 0.86 | (0.81-0.92) | 1.4E-06 | 3.4E-03 |
| C4     | Psoriasis and related disorders                                   | Autoimmune      | 911    | 29,298 | 1.18 | (1.10-1.26) | 2.6E-06 | 5.4E-03 |
| C4     | Nephritis and nephropathy without mention of glomerulonephritis   | Kidney disease  | 911    | 27,526 | 0.85 | (0.80-0.91) | 5.2E-06 | 9.6E-03 |
| C4     | Psoriasis vulgaris                                                | Autoimmune      | 718    | 29,298 | 1.19 | (1.10-1.29) | 5.8E-06 | 1.0E-02 |

|              |                                                                   |                 |       |        |      |             |         |         |
|--------------|-------------------------------------------------------------------|-----------------|-------|--------|------|-------------|---------|---------|
| C4           | Lupus (localized and systemic)                                    | Autoimmune      | 430   | 28,681 | 0.81 | (0.73-0.89) | 1.1E-05 | 1.8E-02 |
| C4           | Systemic lupus erythematosus                                      | Autoimmune      | 379   | 26,373 | 0.80 | (0.72-0.88) | 1.5E-05 | 2.3E-02 |
| C4           | Psoriasis                                                         | Autoimmune      | 848   | 29,298 | 1.17 | (1.09-1.25) | 1.6E-05 | 2.5E-02 |
| C4           | Urinary calculus                                                  | Kidney disease  | 2,291 | 37,065 | 1.10 | (1.05-1.15) | 2.7E-05 | 3.9E-02 |
| C4           | Nephritis and nephropathy in diseases classified elsewhere        | Kidney disease  | 658   | 25,534 | 0.85 | (0.79-0.92) | 6.9E-05 | 8.0E-02 |
| C4b          | Rheumatoid arthritis and other inflammatory polyarthropathies     | Autoimmune      | 1,896 | 31,665 | 0.88 | (0.84-0.92) | 9.3E-08 | 3.1E-04 |
| C4b          | Rheumatoid arthritis                                              | Autoimmune      | 1,535 | 31,665 | 0.88 | (0.84-0.93) | 9.7E-07 | 2.5E-03 |
| C4b          | Open-angle glaucoma                                               | Eye disorders   | 1,639 | 26,718 | 0.89 | (0.84-0.94) | 1.4E-05 | 2.2E-02 |
| Catalase     | Hypercholesterolemia                                              | Lipid disorders | 8,511 | 13,436 | 1.07 | (1.04-1.10) | 1.1E-05 | 1.8E-02 |
| Cathepsin B  | Shock                                                             | Other           | 975   | 26,212 | 1.16 | (1.08-1.24) | 4.6E-05 | 5.8E-02 |
| Cathepsin B  | Vascular hamartomas and non-neoplastic nevi                       | Dermatology     | 425   | 26,323 | 0.80 | (0.72-0.89) | 5.1E-05 | 6.3E-02 |
| CD36 ANTIGEN | Other venous embolism and thrombosis                              | Thrombosis      | 3,537 | 23,786 | 0.84 | (0.81-0.87) | 1.6E-23 | 6.2E-19 |
| CD36 ANTIGEN | Deep vein thrombosis [DVT]                                        | Thrombosis      | 1,491 | 23,786 | 0.82 | (0.78-0.86) | 1.4E-15 | 2.5E-11 |
| CD36 ANTIGEN | Pulmonary embolism and infarction, acute                          | Thrombosis      | 1,098 | 30,986 | 0.84 | (0.79-0.89) | 1.0E-09 | 6.8E-06 |
| CD36 ANTIGEN | Acute pulmonary heart disease                                     | Thrombosis      | 1,138 | 30,986 | 0.84 | (0.80-0.89) | 2.0E-09 | 1.0E-05 |
| CD36 ANTIGEN | Arterial embolism and thrombosis                                  | Thrombosis      | 829   | 27,237 | 0.84 | (0.78-0.89) | 6.0E-08 | 2.1E-04 |
| CD36 ANTIGEN | Pulmonary heart disease                                           | Thrombosis      | 3,648 | 30,986 | 0.91 | (0.88-0.94) | 6.7E-08 | 2.3E-04 |
| CD36 ANTIGEN | Encounter for long-term (current) use of anticoagulants           | Thrombosis      | 5,688 | 28,488 | 0.93 | (0.90-0.96) | 7.0E-07 | 1.9E-03 |
| CD36 ANTIGEN | Arterial embolism and thrombosis of lower extremity artery        | Thrombosis      | 301   | 20,938 | 0.78 | (0.70-0.86) | 1.1E-06 | 2.9E-03 |
| CD36 ANTIGEN | Phlebitis and thrombophlebitis                                    | Thrombosis      | 1,098 | 23,786 | 0.87 | (0.82-0.92) | 2.2E-06 | 4.8E-03 |
| CD36 ANTIGEN | Phlebitis and thrombophlebitis of lower extremities               | Thrombosis      | 753   | 23,786 | 0.85 | (0.79-0.92) | 1.2E-05 | 2.0E-02 |
| CD36 ANTIGEN | Coagulation defects                                               | Thrombosis      | 2,623 | 28,488 | 0.92 | (0.89-0.96) | 4.2E-05 | 5.5E-02 |
| CD36 ANTIGEN | Hypercoagulable state                                             | Thrombosis      | 382   | 25,700 | 0.83 | (0.75-0.91) | 7.2E-05 | 8.2E-02 |
| CLC1B        | Atherosclerosis of the extremities                                | Atherosclerosis | 2,683 | 24,460 | 1.14 | (1.09-1.18) | 3.0E-09 | 1.5E-05 |
| CLC1B        | Atherosclerosis of native arteries of the extremities with interm | Atherosclerosis | 1,680 | 23,573 | 1.14 | (1.08-1.20) | 1.3E-06 | 3.3E-03 |
| CLC1B        | Peripheral vascular disease, unspecified                          | Atherosclerosis | 3,493 | 24,460 | 1.09 | (1.05-1.13) | 1.8E-06 | 4.1E-03 |
| CLC1B        | Atherosclerosis                                                   | Atherosclerosis | 4,987 | 24,460 | 1.08 | (1.05-1.12) | 2.3E-06 | 4.9E-03 |
| CLC1B        | Peripheral vascular disease                                       | Atherosclerosis | 4,057 | 26,108 | 1.08 | (1.04-1.12) | 8.2E-06 | 1.4E-02 |



|                       |                                                         |               |       |        |      |             |         |         |
|-----------------------|---------------------------------------------------------|---------------|-------|--------|------|-------------|---------|---------|
| Coagulation Factor XI | Other venous embolism and thrombosis                    | Thrombosis    | 3,537 | 23,786 | 1.12 | (1.08-1.16) | 4.0E-09 | 1.8E-05 |
| Coagulation Factor XI | Deep vein thrombosis [DVT]                              | Thrombosis    | 1,491 | 23,786 | 1.13 | (1.07-1.20) | 4.9E-06 | 9.5E-03 |
| Coagulation Factor XI | Phlebitis and thrombophlebitis                          | Thrombosis    | 1,098 | 23,786 | 1.15 | (1.08-1.22) | 2.2E-05 | 3.2E-02 |
| Coagulation Factor XI | Phlebitis and thrombophlebitis of lower extremities     | Thrombosis    | 753   | 23,786 | 1.18 | (1.09-1.27) | 2.9E-05 | 4.1E-02 |
| Contactin 5           | Hyperpotasemia                                          | Other         | 2,212 | 25,728 | 1.09 | (1.05-1.14) | 5.5E-05 | 6.7E-02 |
| Cystatin C            | Carcinoma in situ of skin                               | Dermatology   | 676   | 29,260 | 0.86 | (0.80-0.92) | 2.9E-05 | 4.0E-02 |
| CYTN                  | Seborrheic keratosis                                    | Autoimmune    | 5,997 | 26,429 | 0.94 | (0.91-0.97) | 4.1E-05 | 5.5E-02 |
| DC SIGN               | Other venous embolism and thrombosis                    | Thrombosis    | 3,537 | 23,786 | 1.16 | (1.12-1.21) | 2.4E-16 | 4.5E-12 |
| DC SIGN               | Deep vein thrombosis [DVT]                              | Thrombosis    | 1,491 | 23,786 | 1.22 | (1.16-1.29) | 3.0E-14 | 3.6E-10 |
| DC SIGN               | Acute pulmonary heart disease                           | Thrombosis    | 1,138 | 30,986 | 1.16 | (1.09-1.23) | 9.7E-07 | 2.5E-03 |
| DC SIGN               | Pulmonary heart disease                                 | Thrombosis    | 3,648 | 30,986 | 1.09 | (1.05-1.13) | 1.8E-06 | 4.1E-03 |
| DC SIGN               | Encounter for long-term (current) use of anticoagulants | Thrombosis    | 5,688 | 28,488 | 1.07 | (1.04-1.11) | 1.8E-06 | 4.1E-03 |
| DC SIGN               | Phlebitis and thrombophlebitis                          | Thrombosis    | 1,098 | 23,786 | 1.16 | (1.09-1.24) | 1.9E-06 | 4.2E-03 |
| DC SIGN               | Pulmonary embolism and infarction, acute                | Thrombosis    | 1,098 | 30,986 | 1.15 | (1.09-1.22) | 2.7E-06 | 5.5E-03 |
| DC SIGN               | Phlebitis and thrombophlebitis of lower extremities     | Thrombosis    | 753   | 23,786 | 1.19 | (1.10-1.28) | 5.6E-06 | 1.0E-02 |
| DC SIGN               | Arterial embolism and thrombosis                        | Thrombosis    | 829   | 27,237 | 1.16 | (1.09-1.24) | 1.7E-05 | 2.6E-02 |
| Endoglin              | Other venous embolism and thrombosis                    | Thrombosis    | 3,537 | 23,786 | 0.91 | (0.87-0.94) | 1.8E-07 | 5.5E-04 |
| EphA1                 | Cardiac shunt/ heart septal defect                      | Other         | 534   | 35,498 | 0.86 | (0.80-0.93) | 6.5E-05 | 7.6E-02 |
| Factor H              | Macular degeneration (senile) of retina NOS             | Eye disorders | 1,094 | 21,702 | 0.74 | (0.69-0.80) | 1.6E-15 | 2.5E-11 |
| Factor H              | Degeneration of macula and posterior pole of retina     | Eye disorders | 3,441 | 24,814 | 0.85 | (0.81-0.89) | 1.2E-12 | 1.0E-08 |
| Factor H              | Macular degeneration, dry                               | Eye disorders | 1,178 | 21,702 | 0.76 | (0.70-0.82) | 1.3E-12 | 1.0E-08 |
| Factor H              | Macular degeneration, wet                               | Eye disorders | 443   | 21,035 | 0.68 | (0.61-0.75) | 2.2E-12 | 1.6E-08 |
| Factor H              | Drusen (degenerative) of retina                         | Eye disorders | 697   | 24,005 | 0.78 | (0.72-0.86) | 6.5E-08 | 2.3E-04 |
| Factor H              | Other retinal disorders                                 | Eye disorders | 4,828 | 29,679 | 0.91 | (0.88-0.94) | 4.9E-07 | 1.4E-03 |
| Factor I              | Abnormal serum enzyme levels                            | Liver disease | 1,433 | 28,841 | 1.12 | (1.06-1.18) | 5.6E-05 | 6.8E-02 |
| Factor I              | Gram negative septicemia                                | Other         | 520   | 26,281 | 1.20 | (1.10-1.31) | 7.0E-05 | 8.0E-02 |

|                 |                                                     |                 |        |        |      |             |         |         |
|-----------------|-----------------------------------------------------|-----------------|--------|--------|------|-------------|---------|---------|
| FCRL3           | Disorders of optic nerve and visual pathways        | Eye disorders   | 703    | 27,398 | 0.83 | (0.76-0.91) | 4.2E-05 | 5.6E-02 |
| GRN             | Hyperlipidemia                                      | Lipid disorders | 22,646 | 14,038 | 1.08 | (1.05-1.10) | 8.1E-11 | 5.2E-07 |
| GRN             | Disorders of lipid metabolism                       | Lipid disorders | 22,733 | 14,038 | 1.08 | (1.05-1.10) | 1.3E-10 | 7.9E-07 |
| GRN             | Hypercholesterolemia                                | Lipid disorders | 8,511  | 13,436 | 1.09 | (1.06-1.13) | 1.0E-08 | 4.2E-05 |
| GRN             | Mixed hyperlipidemia                                | Lipid disorders | 5,717  | 14,137 | 1.08 | (1.05-1.12) | 5.1E-06 | 9.6E-03 |
| Hemopexin       | Degeneration of macula and posterior pole of retina | Eye disorders   | 3,441  | 24,814 | 1.15 | (1.11-1.20) | 3.2E-11 | 2.1E-07 |
| Hemopexin       | Macular degeneration (senile) of retina NOS         | Eye disorders   | 1,094  | 21,702 | 1.23 | (1.15-1.32) | 2.0E-09 | 9.5E-06 |
| Hemopexin       | Macular degeneration, dry                           | Eye disorders   | 1,178  | 21,702 | 1.24 | (1.16-1.33) | 2.0E-09 | 1.2E-05 |
| Hemopexin       | Other retinal disorders                             | Eye disorders   | 4,828  | 29,679 | 1.11 | (1.07-1.15) | 4.6E-08 | 1.7E-04 |
| Hemopexin       | Drusen (degenerative) of retina                     | Eye disorders   | 697    | 24,005 | 1.23 | (1.13-1.34) | 8.9E-07 | 2.3E-03 |
| IGF II receptor | Other inflammatory spondylopathies                  | Autoimmune      | 428    | 29,069 | 0.83 | (0.75-0.91) | 6.5E-05 | 7.6E-02 |
| IGFBP 3         | Nontoxic uninodular goiter                          | Other           | 978    | 29,343 | 1.17 | (1.09-1.24) | 3.4E-06 | 6.9E-03 |
| IGFBP 3         | Nontoxic nodular goiter                             | Other           | 1,656  | 30,402 | 1.12 | (1.07-1.18) | 5.2E-06 | 9.6E-03 |
| IGFBP 3         | Nontoxic multinodular goiter                        | Other           | 905    | 29,343 | 1.15 | (1.07-1.23) | 6.4E-05 | 7.6E-02 |
| IL 27           | Hypercholesterolemia                                | Lipid disorders | 8,511  | 13,436 | 1.07 | (1.03-1.10) | 3.6E-05 | 4.9E-02 |
| IR              | Other venous embolism and thrombosis                | Thrombosis      | 3,537  | 23,786 | 0.87 | (0.84-0.90) | 3.4E-14 | 4.0E-10 |
| IR              | Deep vein thrombosis [DVT]                          | Thrombosis      | 1,491  | 23,786 | 0.87 | (0.82-0.91) | 9.9E-08 | 3.2E-04 |
| IR              | Pulmonary heart disease                             | Thrombosis      | 3,648  | 30,986 | 0.92 | (0.89-0.95) | 8.2E-07 | 2.2E-03 |
| IR              | Acute pulmonary heart disease                       | Thrombosis      | 1,138  | 30,986 | 0.87 | (0.82-0.92) | 2.0E-06 | 4.4E-03 |
| IR              | Pulmonary embolism and infarction, acute            | Thrombosis      | 1,098  | 30,986 | 0.87 | (0.82-0.92) | 2.1E-06 | 4.5E-03 |
| JAG1            | Other venous embolism and thrombosis                | Thrombosis      | 3,537  | 23,786 | 0.87 | (0.84-0.90) | 2.4E-15 | 3.5E-11 |
| JAG1            | Deep vein thrombosis [DVT]                          | Thrombosis      | 1,491  | 23,786 | 0.85 | (0.80-0.89) | 1.9E-10 | 1.1E-06 |
| JAG1            | Pulmonary embolism and infarction, acute            | Thrombosis      | 1,098  | 30,986 | 0.88 | (0.83-0.93) | 1.9E-05 | 2.8E-02 |
| JAG1            | Phlebitis and thrombophlebitis                      | Thrombosis      | 1,098  | 23,786 | 0.88 | (0.83-0.94) | 5.0E-05 | 6.2E-02 |
| JAG1            | Acute pulmonary heart disease                       | Thrombosis      | 1,138  | 30,986 | 0.89 | (0.84-0.94) | 5.9E-05 | 7.0E-02 |
| MCP 3           | Palpitations                                        | Other           | 4,037  | 18,634 | 1.07 | (1.04-1.11) | 9.0E-05 | 9.6E-02 |
| Met             | Other venous embolism and thrombosis                | Thrombosis      | 3,537  | 23,786 | 0.89 | (0.86-0.92) | 1.7E-10 | 9.8E-07 |
| Met             | Deep vein thrombosis [DVT]                          | Thrombosis      | 1,491  | 23,786 | 0.87 | (0.82-0.91) | 9.6E-08 | 3.1E-04 |

|          |                                                                   |                 |       |        |      |             |         |         |
|----------|-------------------------------------------------------------------|-----------------|-------|--------|------|-------------|---------|---------|
| Met      | Encounter for long-term (current) use of anticoagulants           | Thrombosis      | 5,688 | 28,488 | 0.93 | (0.91-0.96) | 4.4E-06 | 8.6E-03 |
| Met      | Pulmonary embolism and infarction, acute                          | Thrombosis      | 1,098 | 30,986 | 0.87 | (0.82-0.93) | 5.1E-06 | 9.6E-03 |
| Met      | Arterial embolism and thrombosis                                  | Thrombosis      | 829   | 27,237 | 0.86 | (0.80-0.92) | 5.3E-06 | 9.6E-03 |
| Met      | Phlebitis and thrombophlebitis of lower extremities               | Thrombosis      | 753   | 23,786 | 0.84 | (0.78-0.91) | 5.9E-06 | 1.0E-02 |
| Met      | Acute pulmonary heart disease                                     | Thrombosis      | 1,138 | 30,986 | 0.88 | (0.83-0.93) | 6.0E-06 | 1.0E-02 |
| Met      | Phlebitis and thrombophlebitis                                    | Thrombosis      | 1,098 | 23,786 | 0.87 | (0.82-0.92) | 7.0E-06 | 1.2E-02 |
| Met      | Pulmonary heart disease                                           | Thrombosis      | 3,648 | 30,986 | 0.93 | (0.90-0.96) | 1.8E-05 | 2.7E-02 |
| Met      | Arterial embolism and thrombosis of lower extremity artery        | Thrombosis      | 301   | 20,938 | 0.80 | (0.72-0.89) | 4.6E-05 | 5.8E-02 |
| MICA     | Occlusion and stenosis of precerebral arteries                    | Atherosclerosis | 3,784 | 27,696 | 1.08 | (1.04-1.11) | 7.9E-05 | 8.8E-02 |
| MICA     | Psoriasis and related disorders                                   | Autoimmune      | 911   | 29,298 | 0.87 | (0.81-0.93) | 9.6E-05 | 1.0E-01 |
| MICB     | Psoriasis and related disorders                                   | Autoimmune      | 911   | 29,298 | 1.23 | (1.15-1.32) | 7.0E-09 | 3.2E-05 |
| MICB     | Psoriasis vulgaris                                                | Autoimmune      | 718   | 29,298 | 1.25 | (1.16-1.36) | 1.4E-08 | 5.6E-05 |
| MICB     | Type 1 diabetes with renal manifestations                         | Autoimmune      | 311   | 17,918 | 0.74 | (0.66-0.82) | 1.6E-08 | 6.2E-05 |
| MICB     | Type 1 diabetes with ophthalmic manifestations                    | Autoimmune      | 324   | 17,982 | 0.74 | (0.67-0.83) | 2.8E-08 | 1.1E-04 |
| MICB     | Psoriasis                                                         | Autoimmune      | 848   | 29,298 | 1.22 | (1.14-1.31) | 5.8E-08 | 2.1E-04 |
| MICB     | Chronic renal failure [CKD]                                       | Kidney disease  | 5,972 | 27,526 | 0.94 | (0.91-0.96) | 9.3E-06 | 1.5E-02 |
| MICB     | Type 1 diabetes with neurological manifestations                  | Autoimmune      | 498   | 20,002 | 0.84 | (0.77-0.91) | 5.0E-05 | 6.3E-02 |
| MICB     | Urinary calculus                                                  | Kidney disease  | 2,291 | 37,065 | 1.09 | (1.05-1.14) | 5.3E-05 | 6.5E-02 |
| MICB     | Renal failure                                                     | Kidney disease  | 8,336 | 27,526 | 0.95 | (0.93-0.98) | 9.3E-05 | 9.8E-02 |
| MMP 8    | Systemic lupus erythematosus                                      | Autoimmune      | 379   | 26,373 | 0.79 | (0.70-0.88) | 4.2E-05 | 5.5E-02 |
| NPS PLA2 | Infection/inflammation of internal prosthetic device; implant; an | Other           | 1,320 | 35,668 | 1.13 | (1.07-1.19) | 2.4E-05 | 3.5E-02 |
| OX2G     | Other venous embolism and thrombosis                              | Thrombosis      | 3,537 | 23,786 | 0.84 | (0.81-0.87) | 1.9E-22 | 6.2E-18 |
| OX2G     | Deep vein thrombosis [DVT]                                        | Thrombosis      | 1,491 | 23,786 | 0.82 | (0.78-0.86) | 2.6E-14 | 3.5E-10 |
| OX2G     | Pulmonary embolism and infarction, acute                          | Thrombosis      | 1,098 | 30,986 | 0.85 | (0.80-0.89) | 6.0E-09 | 2.7E-05 |
| OX2G     | Acute pulmonary heart disease                                     | Thrombosis      | 1,138 | 30,986 | 0.85 | (0.81-0.90) | 1.5E-08 | 6.2E-05 |
| OX2G     | Pulmonary heart disease                                           | Thrombosis      | 3,648 | 30,986 | 0.92 | (0.89-0.95) | 4.8E-07 | 1.4E-03 |

|             |                                                                   |                 |       |        |      |             |         |         |
|-------------|-------------------------------------------------------------------|-----------------|-------|--------|------|-------------|---------|---------|
| OX2G        | Arterial embolism and thrombosis                                  | Thrombosis      | 829   | 27,237 | 0.86 | (0.81-0.92) | 8.0E-06 | 1.4E-02 |
| OX2G        | Encounter for long-term (current) use of anticoagulants           | Thrombosis      | 5,688 | 28,488 | 0.94 | (0.91-0.96) | 1.3E-05 | 2.0E-02 |
| OX2G        | Phlebitis and thrombophlebitis                                    | Thrombosis      | 1,098 | 23,786 | 0.88 | (0.83-0.93) | 2.1E-05 | 3.0E-02 |
| OX2G        | Hypercoagulable state                                             | Thrombosis      | 382   | 25,700 | 0.82 | (0.74-0.90) | 2.6E-05 | 3.7E-02 |
| OX2G        | Coagulation defects                                               | Thrombosis      | 2,623 | 28,488 | 0.92 | (0.88-0.96) | 3.4E-05 | 4.7E-02 |
| P Selectin  | Other venous embolism and thrombosis                              | Thrombosis      | 3,537 | 23,786 | 0.89 | (0.86-0.92) | 8.6E-11 | 5.3E-07 |
| P Selectin  | Deep vein thrombosis [DVT]                                        | Thrombosis      | 1,491 | 23,786 | 0.86 | (0.82-0.91) | 3.2E-08 | 1.2E-04 |
| P Selectin  | Arterial embolism and thrombosis                                  | Thrombosis      | 829   | 27,237 | 0.87 | (0.82-0.93) | 8.9E-05 | 9.6E-02 |
| P Selectin  | Acute pulmonary heart disease                                     | Thrombosis      | 1,138 | 30,986 | 0.89 | (0.84-0.94) | 9.1E-05 | 9.6E-02 |
| PCSK7       | Atherosclerosis of native arteries of the extremities with ulcers | Atherosclerosis | 487   | 26,108 | 1.23 | (1.12-1.36) | 1.8E-05 | 2.7E-02 |
| PDGF Rb     | Acute, but ill-defined cerebrovascular disease                    | Atherosclerosis | 1,184 | 28,518 | 0.88 | (0.83-0.94) | 4.6E-05 | 5.8E-02 |
| PDGF Rb     | Fever of unknown origin                                           | Other           | 5,223 | 32,052 | 0.94 | (0.91-0.97) | 7.3E-05 | 8.3E-02 |
| PPAC        | Peripheral enthesopathies and allied syndromes                    | Joint disease   | 8,354 | 23,812 | 1.06 | (1.03-1.09) | 4.4E-05 | 5.7E-02 |
| PPAC        | Suppurative and unspecified otitis media                          | Eye disorders   | 1,123 | 34,873 | 1.13 | (1.07-1.20) | 7.0E-05 | 8.0E-02 |
| PPAC        | Hepatitis NOS                                                     | Liver disease   | 306   | 29,453 | 1.24 | (1.12-1.39) | 9.2E-05 | 9.7E-02 |
| RGM C       | Dyschromia and Vitiligo                                           | Autoimmune      | 1,591 | 30,869 | 1.11 | (1.05-1.17) | 7.0E-05 | 8.0E-02 |
| sE Selectin | Other venous embolism and thrombosis                              | Thrombosis      | 3,537 | 23,786 | 0.85 | (0.82-0.88) | 6.3E-19 | 1.6E-14 |
| sE Selectin | Deep vein thrombosis [DVT]                                        | Thrombosis      | 1,491 | 23,786 | 0.82 | (0.78-0.86) | 5.7E-14 | 6.2E-10 |
| sE Selectin | Pulmonary heart disease                                           | Thrombosis      | 3,648 | 30,986 | 0.91 | (0.88-0.94) | 2.1E-08 | 8.0E-05 |
| sE Selectin | Acute pulmonary heart disease                                     | Thrombosis      | 1,138 | 30,986 | 0.86 | (0.81-0.91) | 8.0E-08 | 2.7E-04 |
| sE Selectin | Pulmonary embolism and infarction, acute                          | Thrombosis      | 1,098 | 30,986 | 0.86 | (0.81-0.91) | 2.3E-07 | 6.9E-04 |
| sE Selectin | Arterial embolism and thrombosis                                  | Thrombosis      | 829   | 27,237 | 0.84 | (0.79-0.90) | 3.1E-07 | 8.7E-04 |
| sE Selectin | Arterial embolism and thrombosis of lower extremity artery        | Thrombosis      | 301   | 20,938 | 0.77 | (0.69-0.86) | 1.9E-06 | 4.2E-03 |
| sE Selectin | Encounter for long-term (current) use of anticoagulants           | Thrombosis      | 5,688 | 28,488 | 0.93 | (0.91-0.96) | 4.4E-06 | 8.7E-03 |
| sE Selectin | Phlebitis and thrombophlebitis                                    | Thrombosis      | 1,098 | 23,786 | 0.87 | (0.82-0.92) | 5.2E-06 | 9.6E-03 |
| sE Selectin | Phlebitis and thrombophlebitis of lower extremities               | Thrombosis      | 753   | 23,786 | 0.85 | (0.79-0.92) | 2.0E-05 | 2.9E-02 |
| sE Selectin | Occlusion of cerebral arteries                                    | Atherosclerosis | 1,772 | 29,416 | 0.91 | (0.87-0.95) | 8.0E-05 | 8.8E-02 |

|               |                                                                   |               |        |        |      |             |         |         |
|---------------|-------------------------------------------------------------------|---------------|--------|--------|------|-------------|---------|---------|
| sE Selectin   | Hypercoagulable state                                             | Thrombosis    | 382    | 25,700 | 0.83 | (0.75-0.91) | 9.5E-05 | 9.9E-02 |
| Semaphorin 3E | Cardiac and circulatory congenital anomalies                      | Other         | 1,251  | 38,927 | 0.90 | (0.85-0.95) | 7.4E-05 | 8.3E-02 |
| Siglec 6      | Pain in joint                                                     | Joint disease | 16,646 | 19,613 | 1.05 | (1.02-1.07) | 4.2E-05 | 5.5E-02 |
| sLeptin R     | Corneal opacity and other disorders of cornea                     | Eye disorders | 888    | 26,718 | 0.86 | (0.80-0.92) | 3.0E-05 | 4.2E-02 |
| sRAGE         | Rheumatoid arthritis                                              | Autoimmune    | 1,535  | 31,665 | 0.88 | (0.84-0.92) | 7.8E-08 | 2.7E-04 |
| sRAGE         | Rheumatoid arthritis and other inflammatory polyarthropathies     | Autoimmune    | 1,896  | 31,665 | 0.90 | (0.86-0.94) | 1.3E-06 | 3.3E-03 |
| ST4S6         | Other venous embolism and thrombosis                              | Thrombosis    | 3,537  | 23,786 | 0.88 | (0.85-0.92) | 1.4E-11 | 1.0E-07 |
| ST4S6         | Deep vein thrombosis [DVT]                                        | Thrombosis    | 1,491  | 23,786 | 0.86 | (0.82-0.90) | 1.1E-08 | 4.7E-05 |
| ST4S6         | Acute pulmonary heart disease                                     | Thrombosis    | 1,138  | 30,986 | 0.89 | (0.84-0.94) | 4.5E-05 | 5.8E-02 |
| ST4S6         | Arterial embolism and thrombosis                                  | Thrombosis    | 829    | 27,237 | 0.87 | (0.81-0.93) | 5.5E-05 | 6.7E-02 |
| ST4S6         | Pulmonary embolism and infarction, acute                          | Thrombosis    | 1,098  | 30,986 | 0.89 | (0.84-0.94) | 8.7E-05 | 9.4E-02 |
| sTie 1        | Deep vein thrombosis [DVT]                                        | Thrombosis    | 1,491  | 23,786 | 1.15 | (1.10-1.21) | 3.4E-08 | 1.3E-04 |
| sTie 1        | Other venous embolism and thrombosis                              | Thrombosis    | 3,537  | 23,786 | 1.10 | (1.06-1.14) | 1.3E-07 | 4.1E-04 |
| sTie 1        | Other persistent mental disorders due to conditions classified el | Dementias     | 1,516  | 29,922 | 1.11 | (1.06-1.17) | 6.9E-05 | 8.0E-02 |
| TF            | Cardiac congenital anomalies                                      | Other         | 1,059  | 38,927 | 1.15 | (1.08-1.22) | 5.3E-06 | 9.6E-03 |
| VEGF sR2      | Other venous embolism and thrombosis                              | Thrombosis    | 3,537  | 23,786 | 0.85 | (0.82-0.89) | 6.7E-18 | 1.5E-13 |
| VEGF sR2      | Deep vein thrombosis [DVT]                                        | Thrombosis    | 1,491  | 23,786 | 0.82 | (0.78-0.86) | 9.1E-14 | 8.4E-10 |
| VEGF sR2      | Arterial embolism and thrombosis                                  | Thrombosis    | 829    | 27,237 | 0.84 | (0.78-0.90) | 2.7E-07 | 7.9E-04 |
| VEGF sR2      | Acute pulmonary heart disease                                     | Thrombosis    | 1,138  | 30,986 | 0.86 | (0.81-0.91) | 2.9E-07 | 8.3E-04 |
| VEGF sR2      | Pulmonary embolism and infarction, acute                          | Thrombosis    | 1,098  | 30,986 | 0.86 | (0.81-0.91) | 5.5E-07 | 1.5E-03 |
| VEGF sR2      | Pulmonary heart disease                                           | Thrombosis    | 3,648  | 30,986 | 0.92 | (0.89-0.95) | 1.6E-06 | 3.8E-03 |
| VEGF sR2      | Arterial embolism and thrombosis of lower extremity artery        | Thrombosis    | 301    | 20,938 | 0.78 | (0.70-0.87) | 8.3E-06 | 1.4E-02 |
| VEGF sR2      | Phlebitis and thrombophlebitis                                    | Thrombosis    | 1,098  | 23,786 | 0.87 | (0.82-0.93) | 1.2E-05 | 1.9E-02 |
| VEGF sR2      | Encounter for long-term (current) use of anticoagulants           | Thrombosis    | 5,688  | 28,488 | 0.94 | (0.91-0.97) | 1.9E-05 | 2.8E-02 |
| VEGF sR2      | Other and unspecified coagulation defects                         | Thrombosis    | 1,176  | 24,191 | 0.89 | (0.83-0.94) | 4.1E-05 | 5.5E-02 |

|          |                                                         |                 |       |        |      |             |         |         |
|----------|---------------------------------------------------------|-----------------|-------|--------|------|-------------|---------|---------|
| VEGF sR2 | Phlebitis and thrombophlebitis of lower extremities     | Thrombosis      | 753   | 23,786 | 0.86 | (0.80-0.92) | 5.4E-05 | 6.6E-02 |
| VEGF sR2 | Occlusion of cerebral arteries                          | Atherosclerosis | 1,772 | 29,416 | 0.91 | (0.87-0.95) | 7.5E-05 | 8.3E-02 |
| VEGF sR2 | Acute, but ill-defined cerebrovascular disease          | Atherosclerosis | 1,184 | 28,518 | 0.89 | (0.84-0.94) | 8.6E-05 | 9.3E-02 |
| VEGF sR3 | Other venous embolism and thrombosis                    | Thrombosis      | 3,537 | 23,786 | 0.92 | (0.89-0.96) | 3.0E-05 | 4.2E-02 |
| vWF      | Other venous embolism and thrombosis                    | Thrombosis      | 3,537 | 23,786 | 1.16 | (1.12-1.20) | 1.5E-15 | 2.5E-11 |
| vWF      | Deep vein thrombosis [DVT]                              | Thrombosis      | 1,491 | 23,786 | 1.20 | (1.14-1.26) | 1.3E-12 | 1.0E-08 |
| vWF      | Acute pulmonary heart disease                           | Thrombosis      | 1,138 | 30,986 | 1.15 | (1.09-1.22) | 1.8E-06 | 4.1E-03 |
| vWF      | Pulmonary heart disease                                 | Thrombosis      | 3,648 | 30,986 | 1.08 | (1.05-1.12) | 4.5E-06 | 8.7E-03 |
| vWF      | Pulmonary embolism and infarction, acute                | Thrombosis      | 1,098 | 30,986 | 1.14 | (1.08-1.21) | 5.0E-06 | 9.6E-03 |
| vWF      | Phlebitis and thrombophlebitis                          | Thrombosis      | 1,098 | 23,786 | 1.15 | (1.08-1.22) | 7.3E-06 | 1.2E-02 |
| vWF      | Phlebitis and thrombophlebitis of lower extremities     | Thrombosis      | 753   | 23,786 | 1.18 | (1.10-1.27) | 8.7E-06 | 1.4E-02 |
| vWF      | Encounter for long-term (current) use of anticoagulants | Thrombosis      | 5,688 | 28,488 | 1.06 | (1.03-1.10) | 2.9E-05 | 4.0E-02 |

**Supplementary Table 6: Summary of associations for proteins associated with thrombosis phenotype.** Shown are associated with either "Deep vein thrombosis" (n=1,491 case) or "Other venous embolism and thrombosis" (n=3,537 cases). A "Yes" in the ABO column indicates that the association was not significant ( $p > 0.01$ ) when SNPs located in the ABO region were removed from the predictor.

| Protein      | Cases | Controls | ABO | Odds-ratio | 95% CI      | p-value               |
|--------------|-------|----------|-----|------------|-------------|-----------------------|
| BCAM         | 1,491 | 23,786   | Yes | 1.14       | (1.08-1.20) | $1.3 \times 10^{-6}$  |
| CD36 Antigen | 3,537 | 23,786   | Yes | 0.84       | (0.81-0.87) | $1.6 \times 10^{-23}$ |
| F11          | 3,537 | 23,786   | No  | 1.12       | (1.08-1.16) | $4.0 \times 10^{-9}$  |
| DC SIGN      | 3,537 | 23,786   | No  | 1.16       | (1.12-1.21) | $2.4 \times 10^{-16}$ |
| Endoglin     | 3,537 | 23,786   | Yes | 0.91       | (0.87-0.94) | $1.8 \times 10^{-7}$  |
| INSR         | 3,537 | 23,786   | Yes | 0.87       | (0.84-0.90) | $3.4 \times 10^{-14}$ |
| JAG1         | 3,537 | 23,786   | Yes | 0.87       | (0.84-0.90) | $2.4 \times 10^{-15}$ |
| Met          | 3,537 | 23,786   | Yes | 0.89       | (0.86-0.92) | $1.7 \times 10^{-10}$ |
| OX2G         | 3,537 | 23,786   | Yes | 0.84       | (0.81-0.87) | $1.9 \times 10^{-22}$ |
| P-Selectin   | 3,537 | 23,786   | Yes | 0.89       | (0.86-0.92) | $8.6 \times 10^{-11}$ |
| sE-Selectin  | 3,537 | 23,786   | Yes | 0.85       | (0.82-0.88) | $6.3 \times 10^{-19}$ |
| ST4S6        | 3,537 | 23,786   | No  | 0.88       | (0.85-0.92) | $1.4 \times 10^{-11}$ |
| sTie-1       | 1,491 | 23,786   | No  | 1.15       | (1.10-1.21) | $3.4 \times 10^{-8}$  |
| VEGF-sR2     | 3,537 | 23,786   | Yes | 0.85       | (0.82-0.89) | $6.7 \times 10^{-18}$ |
| VEGF-sR3     | 3,537 | 23,786   | Yes | 0.92       | (0.89-0.96) | $3.0 \times 10^{-5}$  |
| vWF          | 3,537 | 23,786   | Yes | 1.16       | (1.12-1.20) | $1.5 \times 10^{-15}$ |

**Supplementary Table 7: Partial correlation coefficients and r-squared values for genetically predicted levels of the lipid and atherosclerosis proteins and measured levels of the proteins in the MDCS data set.** The Pearson's correlation coefficient was adjusted for age and sex, between the genetically predicted and measured levels of the protein.

| <b>Category</b> | <b>Protein</b> | <b>Partial correlation</b> | <b>r-square</b> |
|-----------------|----------------|----------------------------|-----------------|
| Lipids          | ApoE           | 0.17                       | 0.03            |
| Lipids          | ApoE2          | 0.25                       | 0.06            |
| Lipids          | ApoE3          | 0.26                       | 0.07            |
| Lipids          | ApoE4          | 0.10                       | 0.01            |
| Lipids          | Catalase       | 0.11                       | 0.01            |
| Lipids          | GRN            | 0.38                       | 0.14            |
| Lipids          | IL-27          | 0.06                       | 0.003           |
|                 |                |                            |                 |
| Atherosclerosis | CLC1B          | 0.14                       | 0.02            |
| Atherosclerosis | MICA           | 0.66                       | 0.44            |
| Atherosclerosis | PCSK7          | 0.44                       | 0.20            |
| Atherosclerosis | PDGFR- $\beta$ | 0.79                       | 0.62            |
| Atherosclerosis | sE-Selectin    | 0.59                       | 0.35            |
| Atherosclerosis | VEGF-sR2       | 0.28                       | 0.08            |
